# Supplementary material
Source: publisher site journal article supplement (https://en-cdn.bio-protocol.org/attached/file/20190513/3242%20Supplementary%20file%20fura2%20analysis.xlsx)
Supplement: Supplementary file 1 [file 3242%20Supplementary%20file%20fura2%20analysis.xlsx]

## Sheet: ANALYSIS
STEP 1	count number of total cells imaged in each trial								STEP 4	calculate descriptive statistics
	total cells									responding cells
	100 uM ATP	10 uM ATP	1 uM ATP	100 nM ATP						100 uM ATP	10 uM ATP	1 uM ATP	100 nM ATP
trial 1	5	5	7	7					mean	1	1	0.8	0.142857
trial 2	10	8	8	7					median	1	1	1	0.142857
trial 3	6	12	6	8					std	0	0	0.447214	0.142857
trial 4	6	9	9						n	5	4	5	3
trial 5	6		10						sem	0	0	0.2	0.0824786
STEP 2	count number of cells that had discernable calcium response								STEP 5	plot results
	responding cells								[ATP], µM	100	10	1	0.1
	100 uM ATP	10 uM ATP	1 uM ATP	100 nM ATP					mean	1	1	0.8	0.142857
trial 1	5	5	7	1					sem	0	0	0.2	0.0824786
trial 2	10	8	0	2
trial 3	6	12	6	0
trial 4	6	9	9
trial 5	6		10
STEP 3	calculate responding fraction for each trial
	responding cells
	100 uM ATP	10 uM ATP	1 uM ATP	100 nM ATP
trial 1	1	1	1	0.142857
trial 2	1	1	0	0.285714
trial 3	1	1	1	0
trial 4	1	1	1
trial 5	1		1

## Sheet: 100uM ATP (fura2)
Rel. Time (s)	Mean of ROI Object 1 (Fura 2)	Mean of ROI Object 2 (Fura 2)	Mean of ROI Object 3 (Fura 2)	Mean of ROI Object 4 (Fura 2)	Mean of ROI Object 5 (Fura 2)		Rel. Time (s)	Mean of ROI Object 1 (Fura 2)	Mean of ROI Object 2 (Fura 2)	Mean of ROI Object 3 (Fura 2)	Mean of ROI Object 4 (Fura 2)	Mean of ROI Object 5 (Fura 2)	Mean of ROI Object 6 (Fura 2)	Mean of ROI Object 7 (Fura 2)	Mean of ROI Object 8 (Fura 2)	Mean of ROI Object 9 (Fura 2)	Mean of ROI Object 10 (Fura 2)		Rel. Time (s)	Mean of ROI Object 1 (Luc)	Mean of ROI Object 2 (Luc)	Mean of ROI Object 3 (Luc)	Mean of ROI Object 4 (Luc)	Mean of ROI Object 5 (Luc)	Mean of ROI Object 6 (Luc)		Rel. Time (s)	Mean of ROI Object 1 (Luc)	Mean of ROI Object 2 (Luc)	Mean of ROI Object 3 (Luc)	Mean of ROI Object 4 (Luc)	Mean of ROI Object 5 (Luc)	Mean of ROI Object 6 (Luc)		Rel. Time (s)	Mean of ROI Object 1 (Fura 2)	Mean of ROI Object 2 (Fura 2)	Mean of ROI Object 3 (Fura 2)	Mean of ROI Object 4 (Fura 2)	Mean of ROI Object 5 (Fura 2)	Mean of ROI Object 6 (Fura 2)
0	1087.67	904.647	879.102	954.535	968.424		0	857.22	845.556	848.659	928.531	863.156	956.951	854.709	936.136	907.534	939.459		0	498.221	500.904	494.487	481.907	569.593	533.982		0	1146.24	1427.46	1016.53	1105.32	1122.91	1087.44		0	1068.33	1013.11	1082.71	1071.49	1208.65	888.998
1.36996	1089.29	900.909	877.737	952.48	967.586		1.37849	856.359	847.995	849.283	930.994	863.786	961.336	855.899	939.793	911.966	948.154		1.68501	501.273	503.96	509.874	486.442	574.384	539.171		1.16172	1147.75	1422.55	1015.24	1098.3	1121.71	1086.52		1.17388	1066.72	1008.12	1077.85	1070.48	1208.44	886.734
2.54014	1094.38	901.823	877.978	952.439	969.452		2.54917	856.45	846.104	848.788	925.841	863.072	957.788	854.48	941.109	911.845	951.788		2.71115	499.693	500.205	502.253	483.784	571.55	536.378		2.15809	1145.1	1419.84	1014.76	1099.52	1120.03	1084.85		2.34576	1067.1	1007.26	1080.29	1068.36	1206.95	885.619
3.70983	1088.44	896.081	873.759	950.226	965.793		3.71968	852.48	841.354	844.697	928.183	860.561	956.589	850.55	938.097	909.705	950.674		3.73394	502.512	505.267	511.103	488.312	574.803	541.116		3.15629	1148.7	1428.15	1017.82	1102.01	1123.41	1091.34		3.51521	1067.43	1010.62	1079.88	1070.06	1208.2	889.926
4.87979	1091.79	895.645	871.764	945.079	964.301		4.89097	852.311	838.802	844.788	923.428	861.046	955.944	850.856	942.533	907.783	948.951		4.75516	499.252	504.059	515.834	485.305	571.876	538.364		4.15414	1146.82	1427.29	1016.8	1102.22	1120.44	1089.66		4.68487	1072.96	1014.39	1082.3	1072.43	1213.21	891.951
6.04518	1085.88	894.716	867.499	945.843	963.971		6.06312	852.945	836.109	845.342	925.635	862.431	960.031	852.076	944.942	911.151	953.805		5.68589	503.345	504.426	522.981	487.958	576.537	539.394		5.15205	1146.53	1427.09	1015.34	1098.67	1121.76	1086.14		5.85491	1070.17	1013.55	1081.58	1071.61	1210.16	891.303
7.21561	1088.48	894.139	870.344	946.088	964.159		7.23365	851.356	833.545	841.512	916.181	855.473	956.392	847.707	939.761	906.058	945.005		6.71119	498.606	501.041	509.111	483.062	571.255	536.578		6.15012	1144.44	1427.02	1014.59	1100.82	1122.66	1085.93		7.02563	1075.07	1018.56	1089.44	1073.87	1215.33	896.114
8.38568	1088.19	892.03	865.006	945.665	965.351		8.40478	854.499	838.569	843.564	920.991	862.241	957.902	851.862	945.301	909.327	955.673		7.72964	500.83	503.029	492.463	484.754	571.565	538.958		7.14813	1143.07	1426.95	1015.4	1102.4	1122.54	1086.84		8.19552	1071.68	1021.94	1084.75	1072.89	1214.34	892.978
9.556	1087.68	892.841	866.928	943.213	964.086		9.57579	855.514	834.782	844.77	920.248	862.194	959.904	850.204	945.337	912.579	955.602		8.74886	499.725	506.321	489.826	487.461	573.918	540.536		8.14692	1145.37	1425.49	1015.05	1099.58	1122.09	1088.19		9.36488	1077.57	1023.93	1090.3	1080.15	1218.85	897.485
10.7265	1082.91	891.055	866.756	943.18	965.113		10.7461	849.646	831.489	841.208	917.137	856.778	955.093	846.902	942.553	906.741	948.985		9.76736	503.489	507.1	492.57	485.961	574.043	541.338		9.14458	1147.68	1428.26	1017.31	1102.79	1125.58	1086.52		10.5344	1079.76	1028.98	1094.88	1081.78	1223.71	896.522
11.8982	1085.08	889.223	863.592	937.544	964.241		11.9163	851.227	829.097	841.492	916.021	856.375	956.324	846.838	943.885	910.453	951.356		10.6913	503.762	504.215	503.226	488.36	576.938	541.912		10.1435	1145.26	1426.59	1014.56	1102.68	1124.67	1088.93		11.704	1078.99	1029.66	1088.43	1079.44	1222.92	866.569
13.0688	1086.17	891.389	865.777	941.266	968.934		13.0879	850.981	829.129	843.643	918.232	856.781	957.166	848.626	943.28	907.955	952.285		11.714	501.12	503.153	496.752	483.127	571.03	537.459		11.1413	1148.34	1432.5	1017.91	1103.07	1129.18	1089.51		12.8731	1073.99	1024.97	1056.54	1063.32	1218.23	806.891
14.2391	1028.45	867.007	838.971	897.562	927.263		14.259	846.571	824.531	841.026	913.34	854.615	955.374	844.117	940.182	906.629	948.446		12.7385	499.986	502.388	483.046	485.429	570.114	536.673		12.1394	1143.09	1425.53	1016.33	1099.58	1122.86	1084.49		14.0436	1039.89	1022.97	865.205	952.258	1218.52	809.304
15.409	948.764	831.951	792.831	839.219	870.848		15.4251	849.841	828.463	841.393	914.681	854.416	956.727	844.663	943.344	908.984	952.589		13.7631	503.771	507.823	475.446	485.802	575.364	540.914		13.1372	1149.1	1427.29	1018.47	1104.09	1127.22	1089.09		15.2147	859.008	1005.96	858.99	871.903	1212.77	809.587
16.5798	642.187	759.971	641.188	637.507	628.52		16.5958	846.483	823.458	841.394	910.066	851.815	955.08	843.421	943.539	906.11	949.963		14.6876	503.451	510.29	468.832	484.497	572.751	540.38		14.1354	1148.82	1431.17	1020	1107.76	1136.64	1095.5		16.3798	843.778	822.877	863.763	866.03	1145.36	811.601
17.75	595.471	684.429	563.034	588.032	583.135		17.7654	846.32	823.714	840.001	910.063	849.992	954.392	840.379	940.2	903.514	945.246		15.7093	497.555	511.477	461.856	482.059	571.482	537.463		15.1336	1156.64	1439.84	1029.94	1116.18	1135.07	1100.23		17.5496	838.875	809.659	864.058	864.551	911.904	813.565
18.9198	587.786	590.121	549.585	579.177	573.815		18.9377	846.706	822.744	838.914	906.116	849.344	949.661	837.676	938.392	900.779	946.796		16.7323	501.714	512.255	465.825	485.536	574.11	540.7		16.1321	1161.26	1447.82	1038.15	1119.68	1141.56	1104.28		18.7193	839.205	805.654	872.75	866.127	900.274	812.617
20.0904	585.846	561.742	545.048	571.402	570.103		20.1092	869.205	830.859	866.636	932.095	873.67	980.141	851.978	966.893	917.395	985.134		17.7571	498.948	507.192	464.876	483.81	569.9	539.169		17.1298	1157.98	1442.23	1032.95	1116.92	1135.36	1103.61		19.8893	841.562	807.672	878.761	870.17	899.853	814.754
21.2611	589.778	557.961	545.322	571.83	568.59		21.2806	848.124	760.925	836.849	910.284	875.802	934.69	842.008	942.547	781.631	965.744		18.6859	498.236	506.741	463.307	483.64	570.471	536.951		18.1221	1159.63	1447.38	1036.79	1122.2	1139.73	1106.83		21.0592	839.401	811.237	881.393	870.077	900.053	813.814
22.4332	587.116	554.367	548.347	572.705	573.11		22.4513	753.229	725.68	755.633	772.592	803.787	821.695	767.015	809.602	753.77	814.953		19.7076	493.234	509.653	464.289	483.946	573.429	535.377		19.1204	1155.68	1445.72	1034.19	1119.79	1137.77	1107.12		22.0829	841.745	816.666	880.806	872.711	905.208	816.185
23.6032	592.832	557.115	550.114	574.266	576.636		23.6218	737.483	716.053	738.967	758.306	770.756	798.518	750.115	785.007	746.861	797.194		20.7299	451.022	489.91	454.78	480.401	558.267	482.909		20.1178	1149.56	1444.62	1032.84	1117.75	1138.77	1103.46		23.1058	838.561	817.665	875.71	872.847	907.305	815.158
24.7734	595.488	559.042	552.086	578.657	579.301		24.7922	727.93	711.381	732.858	749.529	761.321	786.848	742.156	779.928	741.167	790.919		21.7544	447.999	465.395	454.912	469.493	485.385	475.306		21.1167	1136.39	1439.95	958.059	1115.97	1134.98	1101.94		24.1288	839.287	818.499	868.055	867.595	909.729	811.178
25.7973	600.956	563.882	557.366	580.501	581.68		25.9637	721.956	703.273	729.432	740.253	754.555	780.333	735.748	786.142	732.015	783.617		22.6869	448.497	472.175	459.686	463.602	488.814	479.134		22.1147	1038.2	1434.31	940.881	1112.47	1122.08	1106.4		25.1458	842.724	820.338	869.313	872.369	916.203	817.31
26.8203	602.275	567.302	558.623	582.968	583.743		27.1351	713.423	693.169	720.088	730.212	741.846	767.646	717.813	792.724	711.651	769.751		23.7082	447.354	470.531	453.863	459.499	485.964	476.676		23.1132	969.074	1397.44	939.397	1075.4	1011.43	1104.39		26.1688	842.676	814.314	867.462	870.626	917.555	812.454
27.8433	605.866	571.637	564.984	587.849	589.866		28.3059	704.319	678.175	709.002	717.724	728.681	757.434	701.731	778.841	690.649	756.836		24.7314	444.527	464.799	452.162	458.75	483.484	474.114		24.0109	961.107	1166.24	934.601	987.429	989.734	1100.71		27.1918	840.283	810.557	868.117	870.022	917.926	815.124
28.8663	606.661	574.347	567.711	591.857	591.644		29.4777	688.26	661.133	693.947	699.491	706.084	742.713	677.482	746.457	669.475	731.486		25.7555	447.592	466.136	455.575	462.189	490.943	479.056		25.0109	958.527	1030.86	935.333	977.726	981.91	1083.35		28.2138	841.091	805.418	868.961	868.189	920.125	813.789
29.8893	609.453	580.391	571.038	595.222	594.946		30.6488	672.171	644.584	677.659	683.625	690.392	729.185	661.062	712.067	653.68	712.88		26.6861	444.595	460.782	451.766	454.796	485.943	472.615		26.0109	956.169	1031.15	936.808	978.063	982.893	1003.65		29.2368	842.921	801.278	871.024	867.539	916.579	815.107
30.9123	613.249	586.656	574.497	596.446	596.37		31.6729	656.826	635.181	661.324	670.158	678.256	717.259	649.605	694.978	645.605	702.842		27.7074	442.62	462.952	451.772	457.805	486.327	473.137		27.0109	962.35	1042.65	939.483	980.382	984.453	984.853		30.2588	842.377	800.026	870.052	866.184	913.419	815.771
31.9353	614.038	588.763	579.949	600.022	599.684		32.6959	650.624	629.467	652.214	662.025	672.052	706.805	645.751	685.553	643.995	693.615		28.6859	450.392	467.037	452.812	461.375	491.551	477.668		28.0109	961.307	1053.39	935.608	974.987	983.093	977.228		31.2818	844.981	802.079	873.088	869.36	910.07	813.225
32.9583	615.622	591.341	582.391	601.863	600.809		33.7139	642.053	626.629	646.487	653.841	664.814	696.672	642.037	679.455	639.083	689.845		29.6859	450.592	467.393	453.412	460.138	493.481	475.947		29.0109	965.107	1070.8	942.082	979.808	987.386	974.601		32.3048	844.269	798.175	870.864	863.909	905.694	813.806
33.9823	616.978	594.598	589.979	605.861	605.964		34.7369	641.601	623.423	643.839	651.183	665.363	693.996	641.04	677.364	641.087	689.046		30.6859	444.458	461.002	450.692	456.217	487.74	471.398		30.0109	967.595	1087.7	941.61	979.01	989.344	975.633		33.3278	847.485	805.354	876.045	871.505	904.839	815.731
35.0053	619.226	596.672	591.658	607.663	606.242		35.7599	642.32	625.223	644.068	653.343	665.313	690.568	641.468	680.062	641.405	689.221		31.6859	444.226	461.832	453.236	457.758	487.519	472.48		31.0109	972.097	1106.93	939.759	982.134	990.641	974.172		34.3508	851.656	805.673	878.478	869.822	905.843	816.108
36.0243	619.985	597.702	592.548	611.889	608.812		36.7829	639.866	623.263	642.09	651.327	663.029	688.033	641.702	675.939	640.043	689.995		32.6859	447.588	462.612	453.564	455.885	486.579	472.48		32.0109	977.082	1131.64	942.5	985.969	996.307	977.199		35.3688	850.422	806.484	877.015	868.765	902.504	815.772
37.0483	624.471	601.82	597.999	616.7	611.613		37.8059	640.785	623.529	638.939	649.803	663.19	686.745	641.629	679.125	643.197	688.941		33.6859	441.602	459.641	447.842	453.657	485.091	470.056		33.0109	983.514	1152.09	942.393	989.126	1001.05	983.715		36.3918	856.013	808.367	881.638	871.794	904.79	816.919
38.0713	624.91	605.473	599.738	618.405	615.686		38.8289	641.982	625.523	640.369	649.32	662.863	685.168	641.585	677.114	642.11	688.266		34.6859	446.371	463.9	454.059	459.371	486.992	473.229		34.0109	985.171	1168.64	942.012	989.985	999.282	981.208		37.4148	857.702	811.895	880.985	874.91	908.429	818.324
39.0943	626.205	607.83	605.084	623.549	618.516		39.8519	640.071	627.456	641.221	652.261	662.663	687.238	641.954	677.742	643.256	690.952		35.6859	439.21	459.903	447.118	452.292	481.066	469.612		35.0109	989.578	1192.3	943.198	996.107	1004.6	989.492		38.4328	861.263	811.812	883.346	875.969	911.046	817.546
40.1173	625.45	610.706	605.941	622	618.672		40.8699	637.688	627.686	645.139	653.05	661.402	689.123	641.818	679.823	644.075	691.953		36.6859	443.881	462.198	448.629	454.829	485.339	473.183		36.0109	988.595	1209.74	940.116	996.154	1002.93	989.35		39.4558	860.649	810.616	883.224	875.7	906.291	817.607
41.1403	629.808	613.856	609.656	626.402	618.7		41.8879	637.72	627.144	646.307	652.685	660.093	686.847	643.188	679.016	644.817	693.275		37.6859	441.375	460.645	447.964	453.244	482.85	470.288		37.0109	987.944	1230.09	940.95	1005.42	1008.27	996.825		40.4788	862.894	810.406	883.627	876.281	912.179	817.944
42.1633	629.093	614.631	611.936	629.835	620.363		42.9109	638.582	627.965	646.731	654.705	662.483	689.401	643.674	681.246	647.585	694.362		38.6859	444.039	460.578	449.16	455.544	482.399	472.031		38.0109	983.153	1246.63	938.975	1003.95	1005.71	995.319		41.5018	870.323	814.498	888.708	882.789	917.012	818.664
43.1863	631.352	619.221	617.995	631.07	626.049		43.9339	640.861	630.051	647.476	656.219	663.951	691.223	644.716	682.968	649.238	697.371		39.6859	443.259	461.832	452.469	458.636	486.381	473.518		39.0109	977.49	1255.65	939.484	1008.91	1005.24	995.328		42.5248	875.75	813.873	887.885	886.042	919.955	819.846
44.2093	629.64	620.836	618.293	637.878	624.551		44.9569	638.963	628.585	650.553	655.836	662.667	688.664	643.102	681.223	645.219	696.844		40.6859	439.036	456.263	444.459	451.663	479.901	468.31		40.011	973.749	1264.84	939.958	1009.76	1007.97	996.868		43.5428	869.534	810.583	883.706	883.306	917.734	817.943
45.2313	634.249	626.52	623.112	640.863	628.235		45.9799	642.183	628.225	656.164	656.649	664.897	691.682	646.239	684.052	648.385	698.703		41.6859	442.958	459.995	449.447	455.649	483.295	472.12		41.0109	969.943	1262.94	936.363	1004.71	1003.38	993.234		44.5668	878.576	813.73	884.967	884.523	919.726	818.876
46.2543	632.562	630.292	626.693	642.491	629.152		47.0029	642.978	630.276	657.958	659.211	663.876	692.839	646.278	684.02	648.949	698.111		42.6859	443.423	460.568	450.293	455.697	484.476	471.776		42.011	964.999	1265.83	935.843	1004.51	998.819	986.442		45.5898	881.02	814.793	886.284	887.412	921.778	820.22
47.2803	636.146	632.002	629.569	647.151	632.481		48.0259	645.205	633.189	659.845	662.401	666.215	695.041	647.239	688.976	651.873	700.296		43.6859	440.588	456.644	447.504	452.403	480.242	469.151		43.0109	968.639	1264.95	941.597	1008.01	998.768	986.52		46.6138	886.767	816.325	894.104	892.705	923.69	823.174
48.3033	636.305	635.859	631.482	651.426	634.599		49.0489	640.792	631.241	655.299	659.869	664.779	692.198	643.215	682.811	647.063	698.309		44.6859	444.087	460.189	447.92	453.388	483.614	470.113		44.0109	969.068	1258.64	939.585	1005.85	998.516	981.42		47.6358	889.304	814.832	894.15	892.68	922.985	822.041
49.3283	635.146	635.625	636.495	655.262	636.561		50.0719	639.232	630.697	649.895	658.73	662.895	690.308	645.057	681.215	647.402	698.277		45.6859	447.35	463.36	449.072	454.685	484.987	473.49		45.0109	974.288	1254.7	946.711	1006.6	999.629	982.677		48.6588	891.279	817.678	895.211	893.186	922.042	823.397
50.3523	640.124	641.949	639.834	658.086	638.555		51.0969	626.544	624.589	638.265	648.763	654.676	683.066	639.073	675.53	644.785	694.743		46.6859	444.275	462.531	448.284	454.615	486.497	472.427		46.0109	974.923	1235.74	946.295	1000.23	995.211	975.781		49.6818	898.316	819.218	900.718	896.485	927.819	823.622
51.3763	642.234	645.425	645.72	665.703	641.429		52.1219	602.864	610.368	616.927	623.353	638.241	665.895	627.812	663.395	637.798	684.063		47.6859	441.403	455.914	445.578	450.971	481.081	467.829		47.0109	978.383	1221.06	949.419	1001.38	998.077	978.403		50.7068	903.012	817.796	898.185	897.98	927.105	822.002
52.3993	639.31	646.23	647.734	667.285	640.443		53.1459	567.224	584.924	583.858	593.439	609.146	637.61	608.38	642.09	619.908	663.763		48.6859	443.571	458.396	446.994	452.348	483.109	469.686		48.0109	976.851	1189.47	946.446	994.847	996.249	972.722		51.7297	907.266	821.452	901.514	900.447	929.528	821.899
53.4193	640.548	646.85	651.293	669.673	643.51		54.1689	522.12	548.665	539.817	548.029	569.286	598.703	580.502	611.335	600.547	642.886		49.6859	447.648	461.016	449.52	456.1	484.927	473.608		49.011	981.712	1168.03	948.565	996.711	1002.2	976.262		52.7528	912.975	821.472	905.364	903.208	930.658	825.535
54.4443	643.802	651.12	656.189	675.334	646.368		55.1929	465.975	506.625	488.719	496.388	520.813	550.598	543.068	573.161	573.272	608.85		50.6859	441.081	458.079	444.577	451.878	481.722	468.941		50.0109	989.222	1144.51	951.979	995.449	1002.86	979.618		53.7758	916.49	820.732	906.02	901.157	934.307	825.754
55.4633	644.598	650.58	657.354	675.118	647.581		56.2189	403.916	453.798	429.073	435.037	465.606	498.431	501.019	524.629	536.513	569.246		51.6859	442.663	459.876	446.171	453.658	484.105	472.146		51.0109	983.78	1128.04	947.439	989.474	1001.79	973.622		54.7988	924.626	821.52	905.641	909.184	940.337	825.908
56.4863	647.746	655.537	664.685	679.395	651.192		57.2439	358.137	394.141	374.944	379.407	402.955	431.541	445.511	469.917	492.394	518.283		52.6859	444.166	463.236	448.304	456.373	486.2	472.31		52.0109	989.931	1132.99	947.455	998.121	1007.36	980.818		55.8218	929.107	823.994	909.182	910.577	940.48	827.401
57.5113	647.3	658.852	666.3	682.24	652.121		58.2669	339.564	358.735	350.127	350.637	365.795	384.151	392.297	408.412	435.829	461.697		53.6859	440.141	458.127	445.184	450.679	481.366	469.205		53.0109	992.362	1135.88	944.662	997.259	1010.78	984.314		56.8448	931.865	823.861	909.461	910.88	938.059	825.635
58.5353	651.11	660.746	668.903	688.728	656.008		59.2919	334.736	343.486	340.956	341.123	349.683	360.566	359.546	370.849	386.968	405.978		54.6859	444.552	461.514	448.423	455.942	486.825	472.164		54.0109	992.92	1145.47	943.432	997.178	1009.73	985.541		57.8678	942.28	824.794	912.363	913.988	944.887	826.743
59.5593	653.522	662.853	673.385	694.412	656.592		60.3079	334.839	339.384	339.159	337.561	343.647	351.148	347.95	351.005	358.754	373.924		55.6859	445.696	462.637	448.23	455.327	486.934	472.792		55.0109	982.265	1158.33	940.358	997.825	1009.42	985.126		58.8908	944.053	825.936	915.422	915.879	947.029	826.491
60.5823	651.801	665.212	678.091	690.615	660.205		61.3319	334.624	338.278	339.035	338.117	344.464	346.292	341.629	345.145	348.224	359.303		56.6809	442.353	461.099	446.093	453.046	486.022	471.592		56.0109	982.737	1174.84	942.283	1001.63	1010.09	991.998		59.9138	949.768	826.142	917.888	918.686	946.456	826.805
61.6063	652.57	667.763	680.433	693.49	660.812		62.3599	331.422	335.397	335.228	332.951	341.327	344.568	339.062	340.798	343.104	353.951		57.6859	442.478	461.019	446.693	454.334	487.987	472.011		57.011	980.636	1194.16	939.123	998.686	1009.3	987.59		60.9369	956.57	827.336	918.198	921.147	948.447	825.665
62.6313	656.336	672.028	685.687	700.392	665.108		63.3839	325.744	335.113	330.771	329.276	340.253	342.663	339.489	339.41	340.965	349.862		58.6859	444.246	464.297	449.303	457.372	487.592	475.232		58.0109	982.581	1212.82	942.325	1004.51	1011.06	989.95		61.9618	956.91	826.831	923.097	921.835	949.095	826.684
63.6563	661.353	675.266	688.377	702.944	667.718		64.4079	315.871	328.737	324.524	320.914	331.189	338.283	337.143	336.048	339.25	345.249		59.6859	439.621	458.944	444.616	452.329	483.236	471.305		59.0109	987.337	1233.77	942.98	1006.56	1012.93	989.736		62.9798	968.342	828.862	923.147	927.975	952.117	831.918
64.6823	659.248	675.849	692.545	707.002	668.91		65.4339	305.835	324.644	316.929	314.811	327.273	330.765	332.885	331.857	336.392	341.914		60.6859	440.625	458.181	444.571	451.184	484.739	469.883		60.0109	987.635	1250.07	940.788	1009.82	1009.91	983.895		64.0028	971.343	829.288	921.503	928.063	954.367	830.059
65.7033	663.075	678.547	697.281	710.805	671.68		66.4579	298.533	313.913	305.404	303.273	315.496	322.294	325.089	325.869	331.922	336.702		61.6859	445.564	461.476	447.592	455.637	488.056	474.404		61.0109	994.192	1269.17	948.453	1015.32	1014.98	988.757		65.0258	977.866	834.205	920.996	929.78	957.358	832.784
66.7293	664.144	682.72	699.43	716.245	672.672		67.4839	293.218	306.06	298.859	298.683	307.981	311.405	317.829	319.022	325.925	331.565		62.6859	441.615	459.129	445.391	454.547	486.008	470.442		62.0109	991.29	1279.99	947.669	1015.77	1012.24	985.469		66.0488	980.395	829.811	921.089	931.971	956.008	830.663
67.7543	667.716	682.277	698.687	717.92	676.178		68.5089	290.935	298.825	294.799	293.33	301.107	306.117	311.672	312.573	319.778	325.122		63.6859	443.087	460.429	446.498	454.3	488.033	472.392		63.0109	996.696	1290.65	950.53	1016.96	1012.78	983.336		67.0718	984.968	832.109	919.117	934.041	959.85	831.592
68.7793	666.801	685.883	703.972	721.677	676.178		69.5339	290.795	296.687	290.781	289.558	297.705	300.795	305.601	304.799	313.034	316.771		64.6859	448.185	461.846	448.27	455.67	490.005	474.489		64.0109	995.469	1301.11	950.209	1014.82	1010.6	981.556		68.0958	990.209	836.359	925.099	938.399	961.661	832.72
69.8043	670.573	687.295	707.467	728.514	683.12		70.5589	289.143	295.604	292.585	292.069	295.562	296.417	299.716	299.381	306.897	311.309		65.6859	442.019	457.178	443.119	451.497	486.26	470.456		65.0109	1002.72	1313.11	955.715	1019.57	1014.34	980.805		69.1188	994.293	834.39	925.167	940.802	965.829	833.843
70.8273	673.402	691.261	708.737	729.351	681.042		71.5849	288.317	291.519	291.364	290.097	295.728	295.196	296.632	295.066	301.089	306.695		66.6859	446.139	461.907	447.71	456.21	490.661	475.781		66.0109	1001.13	1320.4	957.858	1018.67	1014.7	981.734		70.1428	995.341	835.182	924.511	940.918	967.378	835.031
71.8503	672.347	692.039	709.547	734.516	683.846		72.6089	287.825	291.824	289.683	287.083	293.029	293.571	294.119	292.679	298.821	302.137		67.6859	445.622	460.656	446.755	455.015	489.127	474.298		67.0109	1000.84	1314.73	955.819	1014.4	1010.17	978.889		71.1658	997.251	836.815	926.612	944.341	969.544	837.181
72.8743	674.097	692.761	712.232	739.745	685.8		73.6289	287.251	290.648	289.483	287.949	292.098	292.29	291.031	290.639	294.254	296.69		68.6859	441.551	456.862	442.202	451.869	486.316	470.111		68.0109	1003.58	1317.21	953.807	1015.04	1011.16	979.088		72.1888	1002.64	837.306	929.609	944.9	972.52	838.573
73.8993	678.275	696.625	716.025	738.421	688.215		74.6539	287.486	289.907	288.449	286.266	293.422	292.884	291.545	289.658	292.432	294.311		69.6859	445.137	459.451	446.957	456.429	490.683	472.572		69.0109	1010.09	1323.34	954.803	1018.44	1014.89	984.516		73.2058	1008.53	842.334	935.161	949.99	975.571	838.79
74.9223	683.661	700.169	718.204	743.141	691.951		75.6799	284.334	289.275	287.863	284.835	291.125	290.301	289.846	288.482	290.066	292.303		70.6859	445.605	462.278	446.18	457.846	491.7	475.548		70.0109	1005.43	1320.27	953.074	1014	1012.48	984.342		74.2288	1008.97	839.591	936.063	946.984	975.754	837.384
75.9413	684.386	702.303	717.629	748.051	693.336		76.7059	284.276	288.69	286.851	285.763	290.127	289.452	289.863	287.917	289.669	290.905		71.6859	444.233	456.945	444.52	454.134	490.167	471.175		71.0109	1005.18	1308.66	947.683	1013.49	1013.38	986.86		75.2518	1010.37	840.884	941.324	948.551	978.406	838.608
76.9663	688.13	704.663	721.178	752.379	696.657		77.7329	283.311	287.307	286.141	284.155	288.907	288.157	288.225	287.014	288.363	290.772		72.6859	446.703	461.878	447.743	458.175	493.734	476.059		72.0109	1007.02	1298.51	944.17	1014.08	1011.16	988.542		76.2748	1011.85	841.273	945.178	950.151	979.541	841.939
77.9903	689.405	706.05	722.856	756.005	702.069		78.7579	284.346	287.906	286.846	284.663	289.04	289.69	287.454	285.763	287.454	290.475		73.6859	445.058	459.803	445.763	456.371	490.91	474.09		73.0109	1005.16	1286.9	940.389	1010.36	1011.27	988.921		77.2978	1014.8	843.447	943.107	953.297	980.206	840.89
79.0133	693.698	705.764	723.402	759.004	701.126		79.7829	283.016	286.371	284.1	282.378	287.323	288.463	287.388	285.168	285.886	288.712		74.6859	444.048	457.741	443.051	452.503	490.094	471.728		74.0109	1004.12	1275.88	943.884	1011.39	1015.3	991.349		78.3209	1016.5	844.21	944.539	955.989	985.51	844.494
80.0363	695.342	710.335	727.156	765.907	706.788		80.8069	283.159	285.496	285.139	283.44	289.255	289.177	285.991	285.763	287.641	288.024		75.6859	446.708	463.219	448.436	459.562	497.193	477.427		75.0109	1004.97	1259.4	941.162	1009.56	1012.62	991.587		79.3428	1019.7	844.82	950.354	958.511	984.983	844.151
81.0593	695.818	709.682	726.51	768.653	708.799		81.8309	282.9	286.57	284.181	282.347	286.939	287.769	287.213	285.418	287.018	287.436		76.6859	445.188	461.55	448.022	458.627	495.23	473.598		76.011	1002.79	1242.01	942.51	1004.83	1012.82	991.08		80.3658	1020.91	844.795	944.134	954.192	986.212	843.451
82.0823	699.897	711.405	730.069	768.168	711.675		82.8559	282.025	284.086	284.049	282.353	287.232	287.144	286.094	284.484	285.535	288.353		77.6859	441.988	457.614	442.838	453.991	491.692	472.89		77.011	1000.73	1220.68	949.834	1011.23	1015.5	996.214		81.3888	1027.32	849.772	948.835	964.446	996.158	847.446
83.1053	700.759	710.857	727.977	770.268	708.672		83.8789	281.042	286.192	283.603	282.129	286.118	286.294	284.757	283.212	284.869	287.904		78.6859	446.344	461.736	447.792	458.625	495.484	475.863		78.011	995.848	1186.3	949.347	1010.25	1013.81	993.093		82.4108	1027.7	851.038	951.857	964.777	995.071	847.493
84.1293	705.238	715.459	731.455	773.001	716.002		84.9019	282.5	283.841	281.717	280.072	285.861	287.098	285.642	283.113	284.792	288.359		79.6859	446.812	461.185	446.909	457.929	495.273	475.671		79.0109	994.161	1159.8	960.488	1013.47	1017.05	995.455		83.4338	1028.38	848.596	950.534	963.402	997.959	850.173
85.1523	708.714	717.352	733.602	776.046	719.374		85.9189	281.525	284.895	283.323	281.376	286.968	286.17	286.892	283.393	284.429	287.37		80.6859	445.338	455.252	442.683	452.829	493.94	472.142		80.0109	993.637	1139.03	962.659	1010.36	1016.64	990.444		84.4568	1026.88	847.459	949.508	961.453	995.945	848.205
86.1763	711.063	715.853	732.619	776.924	721.243		86.9419	282.818	286.185	283.649	281.931	285.954	285.062	285.469	285.751	287.415	288.382		81.6859	445.632	459.199	447.89	458.973	496.11	473.633		81.0109	997.849	1130.56	969.578	1011.8	1017.04	992.463		85.4798	1030.91	851.847	953.545	964.237	1001.11	850.823
87.1993	712.862	719.507	732.572	780.859	723.208		87.9649	281.482	284.287	283.296	281.211	285.866	286.406	286.202	283.884	285.507	288.094		82.6859	446.782	462.16	447.721	458.501	498.482	474.814		82.0109	1003.64	1138.51	972.116	1014.92	1021.17	991.3		86.4978	1034.56	854.149	956.178	967.761	1005.86	855.47
88.2223	718.608	723.103	733.727	782.344	725.622		88.9819	283.318	286.581	284.146	282.105	286.837	287.735	286.618	282.507	284.703	287.246		83.6859	445.169	459.202	445.168	458.514	495.464	473.876		83.0109	1004.83	1147.79	976.772	1017.09	1021.66	986.87		87.5108	1033.62	854.235	957.466	971.148	1007.55	854.131
89.2453	722.319	723.546	736.696	785.08	730.022		90.0049	282.015	284.6	283.671	280.593	286.978	288.103	285.951	283.739	285.277	288.85		84.6859	447.724	462.955	449.065	459.876	500.985	476.606		84.0109	1003.32	1159.12	971.085	1014.39	1019.28	984.085		88.5288	1034.78	855.412	957.776	969.913	1008.84	854.3
90.2683	723.303	723.894	736.239	783.988	731.871		91.0229	282.894	285.618	283.272	281.318	286.758	286.193	286.584	283.761	284.718	287.451		85.6859	447.046	458.151	446.669	457.689	500.197	476.222		85.0973	1012.22	1185.95	970.957	1021.81	1023.39	984.511		89.5508	1036.88	856.761	958.966	972.663	1012.61	857.991
91.2913	726.766	725.116	735.849	787.739	734.461		92.0409	282.575	285.16	284.552	282.086	287.046	286.957	286.143	282.85	285.832	287.873		86.6859	443.755	459.317	445.671	456.419	498.28	475.531		86.2966	1017.73	1210.28	963.442	1026.96	1024.02	987.53		90.5738	1035.98	858.522	967.3	975.429	1016.68	858.812
92.3143	732.518	731.329	737.455	790.635	738.317		93.0639	281.564	285.657	283.837	283.282	286.801	287.247	285.112	284.888	285.684	288.659		87.6859	448.758	461.792	449.387	460.666	500.74	479.088		87.2951	1016.73	1227.91	947.876	1024.91	1018.93	986.038		91.5968	1035.24	855.28	963.775	971.155	1016.25	857.291
93.3373	734.96	729.88	739.686	788.971	741.263		94.0869	282.355	285.311	282.961	281.751	286.869	287.299	287.631	282.9	286.09	287.331		88.6859	442.837	456.359	444.261	456.624	497.15	473.806		88.2932	1017.75	1249.24	946.917	1031.73	1022.18	990.633		92.6194	1035.78	858.437	967.775	973.733	1021.65	859.724
94.3603	742.22	735.748	742.398	790.534	745.258		95.1099	282.005	285.156	283.388	282.723	288.236	287.547	286.52	285.051	285.215	287.782		89.6859	446.622	463.447	446.861	459.446	500.652	477.28		89.1479	1017.97	1266.11	945.951	1028.22	1020.57	987.79		93.6418	1042.85	860.481	967.031	977.764	1026.11	863.333
95.3833	743.661	733.815	742.449	793.404	746.668		96.1329	283.005	286.916	284.787	282.42	287.619	288.181	286.543	284.877	286.122	287.996		90.6859	446.786	459.462	447.035	460.006	501.835	477.712		90.1479	1014.22	1275.99	936.6	1024.35	1013.12	985.243		94.6658	1039.67	861.413	969.167	974.973	1028.41	863.656
96.4063	749.377	737.663	743.911	795.023	749.588		97.1559	282.902	286.089	284.727	284.951	288.507	287.256	287.408	284.019	285.431	287.733		91.6859	443.877	456.742	443.463	456.215	502.1	476.103		91.1479	1017.16	1293.46	940.151	1026.96	1015.73	989.68		95.6898	1038.21	860.804	971.571	976.691	1028.81	864.827
97.4293	749.195	737.137	740.133	788.168	747.629		98.1789	283.619	284.227	283.77	282.769	288.205	286.912	287.89	284.817	286.316	286.437		92.6859	445.931	456.387	443.164	459.087	500.759	475.757		92.1479	1019.25	1311.51	944.99	1029.35	1017.38	996.412		96.7138	1040.64	865.264	976.669	977.744	1035.42	868.114
98.4523	753.4	742.106	741.778	787.365	751.631		99.2019	281.269	285.595	283.431	282.408	287.985	288.961	286.621	284.078	287.019	287.212		93.6859	447.181	460.846	447.074	462.739	506.1	479.929		93.1479	1019.68	1323.76	947.613	1027.95	1019.45	994.709		97.7308	1039.46	861.742	979.58	975.889	1036.76	866.659
99.4743	752.372	740.463	743.09	793.74	754.669		100.225	282.066	285.835	283.91	282.878	287.904	289.544	287.757	284.493	286.594	289.568		94.6859	446.575	458.151	444.777	459.054	503.527	478.352		94.1479	1022.6	1326.07	950.151	1029.53	1016.03	998.877		98.7558	1044.15	868.212	987.083	980.933	1042.25	869.087
100.497	760.347	741.186	744.531	791.866	755.229		101.248	283.229	287.161	283.856	281.933	288.266	288.263	287.195	285.23	286.202	288.973		96.0521	447.672	459.664	445.621	460.713	506.124	479.67		95.1479	1021.14	1331.81	954.328	1023.42	1016.82	1002.64		99.7788	1044.45	868.359	991.268	982.312	1045.91	871.328
101.52	763.922	744.788	745.18	794.201	759.659		102.266	281.875	287.558	284.091	282.029	286.586	287.849	287.697	284.753	285.148	288.432		97.0789	443.959	459.179	445.969	459.552	505.853	481.479		96.149	1017.29	1335.65	961.809	1025.12	1018.79	1002.59		100.797	1042.33	867.88	993.353	980.855	1048.42	869.874
102.538	768.022	746.25	743.376	793.593	761.456		103.289	282.098	286.461	283.483	282.926	287.497	287.871	286.215	284.761	285.584	289.185		98.0973	443.309	457.083	443.703	458.729	505.446	478.301		97.1479	1007.7	1332.77	967.932	1018.73	1020.77	998.1		101.821	1044.29	871.609	999.164	981.224	1050.71	870.972
103.561	775.02	747.968	747.874	797.808	764.996		104.311	282.005	286.529	284.407	282.12	287.06	288.759	287.13	285.234	287.017	287.972		99.0789	450.615	462.87	447.721	464.193	511.18	485.642		98.1479	1012.45	1329.98	976.351	1019.32	1025.38	1004.36		102.846	1045.63	869.919	1000.89	982.392	1054.89	873.181
104.583	775.569	750.097	746.065	795.836	767.565		105.332	281.731	286.11	284.085	282.393	287.89	289.184	288.226	285.851	285.759	286.858		100.079	444.954	456.947	444.219	459.52	507.91	479.985		99.1479	1009.28	1328.96	981.429	1019.04	1025.98	999.047		103.871	1048.34	878.034	1005.75	984.639	1060.26	874.465
105.606	780.112	752.188	745.969	802.228	769.442		106.355	281.89	286.483	284.075	283.382	287.646	289.085	287.025	284.431	286.463	289		101.079	446.838	459.323	447.634	461.463	510.064	482.273		100.148	1009.67	1319.66	986.583	1023.44	1027.88	998.946		104.895	1049.51	876.075	1006.88	988.137	1062.02	879.439
106.629	780.186	751.247	742.284	794.161	767.043		107.378	283.798	287.644	284.561	282.783	287.812	289.419	287.696	286.579	287.347	288.995		102.079	447.874	461.416	446.376	462.437	512.512	482.114		101.148	1009.32	1310.57	984.623	1019.76	1030.41	997.561		105.919	1050.3	879.521	1003.81	988.469	1067.13	880.528
107.647	785.544	753.976	746.334	802.127	773.839		108.401	283.733	286.66	284.921	282.54	288.619	289.192	288.062	285.114	286.056	288.424		103.079	444.427	455.022	444.107	459.436	508.495	479.842		102.148	1010.44	1294.91	983.157	1021.62	1032.26	997.383		106.942	1048.98	879.27	1006.73	988.944	1071.09	879.175
108.67	787.982	753.732	745.535	800.47	770.442		109.419	283.058	288.154	286.44	285.659	288.998	289.17	287.442	285.475	286.221	288.876		104.079	443.086	454.341	445.141	457.373	508.43	479.641		103.148	1015.01	1272.88	976.192	1020.65	1033.56	991.811		107.966	1048.48	876.972	1002.36	986.075	1068.86	879.189
109.695	793.325	758.605	747.303	805.606	775.175		110.442	281.595	287.626	284.598	284.3	288.681	287.43	286.245	284.506	287.184	287.594		105.079	448.59	460.221	448.141	462.459	513.876	485.915		104.148	1012.58	1242.31	965.386	1019.85	1028.55	992.075		108.99	1046.7	879.521	1012.93	987.08	1074.44	880.114
110.72	795.99	760.252	746.016	802.334	776.107		111.465	283.266	287.581	285.842	284.146	290.293	288.377	287.781	285.053	288.229	288.432		106.079	447.784	461.774	454.713	466.714	516.825	487.612		105.148	1018.62	1216.09	959.991	1024.71	1030.01	994.586		110.014	1047.61	881.569	1015.42	987.612	1078.73	879.356
111.743	798.136	761.413	747.55	806.359	778.659		112.488	284.018	286.367	285.528	283.724	288.799	287.987	287.272	285.903	288.293	289.544		107.079	445.3	456.744	451.642	460.002	514.221	482.252		106.143	1019.99	1183.89	954.035	1023.63	1027.82	993.099		111.038	1048.79	884.894	1019.99	986.955	1079.65	882.279
112.769	799.817	763.286	746.521	805.427	779.95		113.511	283.366	288.413	285.503	283.778	289.268	288.501	286.91	285.971	286.51	289.642		108.079	450.175	462.991	461.232	465.663	517.535	487.429		107.143	1017.41	1158.29	948.182	1023.92	1028.16	992.507		112.063	1048.09	886.641	1022.33	986.432	1085.44	879.698
113.783	802.468	763.264	747.429	806.883	783.198		114.534	281.78	287.275	284.418	284.41	288.924	288.377	289.005	285.209	286.627	288.537		109.079	449.086	461.971	461.89	464.371	517.779	489.76		108.148	1025.36	1151.48	947.985	1026.47	1027.5	998.622		113.081	1046.79	887.233	1023.69	986.829	1087.47	880.51
114.807	802.876	764.784	746.666	806.765	780.226		115.556	282.712	286.059	284.606	283.629	289.239	289.111	287.898	285.504	286.598	287.856		110.079	448.973	460.27	458.611	462.316	518.8	486.697		109.148	1021.17	1150.73	947.719	1029.96	1027.59	998.847		114.104	1046.08	888.473	1024.54	988.481	1087.31	882.045
115.83	809.384	767.207	746.823	808.434	784.882		116.579	283.107	286.02	284.493	283.503	287.621	288.769	287.157	284.496	286.3	289.879		111.075	448.095	460.463	461.179	462.302	516.175	486.216		110.148	1025.59	1158.83	947.283	1034.17	1027.44	999.134		115.127	1049.57	893.117	1023.88	989.841	1094.84	884.08
116.854	809.952	768.759	744.383	806.561	784.893		117.602	283.537	288.066	285.422	285.052	288.656	288.581	287.921	286.32	287.404	289.127		112.079	451.529	462.249	463.27	466.073	521.191	490.687		111.148	1023.72	1168.39	947.355	1032.08	1023.26	995.156		116.149	1050.37	891.468	1024.76	989.806	1097.57	882.316
117.878	817.688	772.17	750.008	808.225	789.896		118.624	281.931	286.176	284.758	283.436	288.474	290.036	288.354	285.452	286.258	288.566		113.079	452.538	465.484	462.279	468.131	522.517	492.193		112.148	1024.1	1190.63	954.382	1038.37	1022.38	998.946		117.17	1052.8	896.198	1024.5	993.73	1100.78	887.085
118.902	817.166	774.344	747.656	807.171	790.219		119.642	283.263	287.241	285.182	283.911	288.288	290.287	287.408	284.705	288.43	290.663		114.079	448.426	460.766	456.201	465.494	519.313	490.873		113.148	1022.72	1209.66	959.838	1041.06	1020.88	1000.87		118.192	1047.16	894.704	1022.11	987.564	1099.03	881.809
119.926	816.465	774.065	745.126	806.286	790.127		120.665	283.348	286.16	285.361	282.975	289.127	290.09	287.553	285.701	287.564	290.88		115.079	452.433	464.49	458.056	467.736	522.799	492.558		114.148	1022.61	1229.83	964.262	1040.45	1024.14	1000.06		119.215	1048.07	897.626	1023.99	989.249	1102.53	885.599
120.951	820.449	776.229	746.699	804.554	791.663		121.688	282.694	288.459	285.979	284.684	289.43	288.038	287.729	285.008	286.803	289.985		116.079	453.2	464.523	457.91	468.514	525.757	495.239		115.148	1023.6	1249.5	969.915	1043.53	1023.87	1002.43		120.238	1050.33	901.023	1029.15	992.536	1106.07	886.358
121.975	822.874	776.836	747.61	807.42	794.475		122.711	283.351	286.932	284.366	282.748	289.68	289.039	288.761	286.455	286.588	290.675		117.079	449.161	461.45	456.141	463.036	521.286	490.432		116.148	1018.3	1264.09	968.148	1038.13	1020.46	993.242		121.261	1050.92	902.941	1027.75	991.475	1107.68	885.874
122.999	827.042	781.493	746.617	808.579	797.932		123.734	283.423	287.626	286.419	284.445	289.283	289.294	288.695	284.809	287.67	289.383		118.079	453.683	464.012	459.053	468.092	525.114	494.308		117.148	1013.34	1281.75	972.726	1037.52	1027.78	998.404		122.284	1050.54	908.049	1033.01	992.592	1109.17	886.193
124.023	833.63	784.849	747.881	806.038	798.331		124.757	283.656	288.012	285.133	284.984	289.907	290.316	288.995	286.275	287.745	289.527		119.079	453.195	462.372	461.381	467.581	524.308	494.595		118.148	1012.72	1291.34	977.775	1035.65	1028.77	999.855		123.307	1047.49	903.828	1025.96	989.286	1109.88	886.263
125.046	832.662	781.903	746.368	807.417	798.952		125.775	283.797	288.043	286.511	284.465	288.896	289.229	288.409	285.32	286.498	290.185		120.079	449.046	459.112	453.903	465.77	523.832	491.781		119.148	1008.18	1303.5	976.001	1034.49	1031.73	1002.44		124.33	1052.5	908.928	1032.2	990.727	1116.7	888.375
126.07	834.301	783.953	749.535	805.741	800.736		126.798	284.627	286.788	284.923	283.715	288.653	289.407	288.457	285.55	287.297	289.44		121.079	452.763	464.757	457.25	467.253	526.799	496.713		120.148	1005.69	1311.87	975.046	1028.25	1034.95	1001.75		125.353	1053.29	908.976	1031.49	993.899	1119.48	887.729
127.089	836.049	785.232	747.084	806.48	801.425		127.821	284.045	286.562	284.659	283.883	288.714	289.983	287.642	286.398	287.653	290.364		122.079	452.271	463.161	455.695	467.506	528.771	497.798		121.148	1012.68	1320.18	973.688	1029.87	1032.88	1003.06		126.371	1050.98	911.831	1032.09	993.213	1117.86	887.808
128.113	842.426	787.52	748.463	807.181	803.854		128.844	284.544	288.031	284.599	282.465	289.62	289.855	289.084	286.423	287.237	289.408		123.079	447.928	461.453	454.239	463.985	525.534	493.619		122.148	1019.21	1328.35	968.788	1025.1	1036.46	1003.61		127.394	1051.4	913.815	1031.09	994.836	1120.76	887.993
129.137	841.285	783.888	745.749	805.629	804.848		129.867	284.676	286.242	285.897	284.22	288.588	288.936	287.936	285.423	287.152	290.088		124.079	450.602	460.689	457.021	467.199	525.944	494.947		123.148	1027.03	1336.78	968.73	1029.34	1037.6	1006.24		128.417	1051.83	916.543	1034.39	995.64	1124.5	888.969
130.161	844.524	786.737	748.828	807.524	807.889		130.89	284.819	288.722	285.555	284.134	288.764	289.097	287.952	285.907	286.92	290.785		125.079	453.836	465.328	456.771	471.23	529.695	501.415		124.148	1031.83	1332.42	963.608	1023.88	1032.79	1005.42		129.44	1052.82	915.944	1032.85	993.708	1124.04	885.133
131.183	844.991	785.083	744.476	803.558	805.541		131.913	283.276	287.466	287.3	284.627	289.832	289.791	288.72	287.281	288.04	290.591		126.079	449.617	460.981	450.247	466.271	526.48	495.996		125.148	1038.95	1333.81	967.724	1027.06	1033.34	1005.53		130.458	1047.72	914.696	1030.91	993.254	1125.94	884.531
132.217	850.075	790.448	746.215	807.229	808.268		132.936	283.544	287.467	286.164	284.149	289.366	289.318	287.312	285.152	287.405	290.982		127.079	449.12	462.951	452.085	467.986	529.553	497.943		126.148	1036.48	1328.27	961.734	1022.92	1026.83	1004.46		131.481	1054.02	921.153	1038.53	997.896	1134.17	888.166
133.24	848.896	789.483	746.348	806.622	807.213		133.954	283.798	286.18	285.573	284.013	288.9	290.47	288.686	286.754	288.704	289.98		128.079	452.106	465.075	456.035	468.773	530.381	501.53		127.148	1040.84	1323.74	964.906	1023.64	1025.97	1010.46		132.504	1049.62	920.959	1034.43	992.902	1132.02	886.551
134.265	852.415	791.444	746.266	809.326	812.274		134.977	283.067	287.045	285.871	284.212	289.017	290.065	287.656	287.788	288.431	290.227		129.079	450.968	464.824	453.137	467.223	529.205	499.572		128.144	1038.6	1315.7	965.764	1026	1024.56	1009.33		133.527	1055.9	924.947	1037.31	994.856	1136.77	887.544
135.29	854.302	794.547	744.792	806.627	809.103		136	284.822	288.768	285.978	284.78	289.378	290.483	289.542	286.778	288.001	290.93		130.079	451.014	465.832	449.413	467.554	530.239	500.832		129.148	1031.72	1306.31	965.269	1023.27	1021.14	1006.39		134.563	1052.41	924.362	1038.02	993.768	1135.52	886.908
136.309	856.631	793.819	743.232	807.413	805.633		137.023	284.783	287.812	285.993	284.324	288.844	290.144	288.839	286.71	287.527	290.243		131.079	454.181	465.516	451.89	469.571	530.995	500.737		130.148	1028.48	1286.16	962.629	1023.63	1017.43	1002.96		135.731	1052.98	925.459	1034.29	993.432	1134.67	885.082
137.333	855.414	796.104	744.926	805.338	811.881		138.046	284.939	287.852	286.249	284.243	289.266	291.613	289.198	287.082	288.364	290.673		132.079	453.6	464.197	448.358	468.276	529.758	502.066		131.148	1020.05	1267.81	967.358	1024.79	1020.48	1004.27		136.896	1049.53	926.998	1035.11	993.761	1133.46	886.812
138.357	856.7	793.265	744.405	805.219	808.352		139.069	285.098	286.853	285.653	284.823	290.432	290.944	289.071	286.455	287.943	290.002		133.079	449.998	462.037	446.157	465.951	528.92	499.456		132.148	1016.78	1247.32	970.115	1029.14	1021.02	1005.23		138.066	1052.37	931.401	1038.15	995.428	1138.52	889.659
139.383	864.564	798.636	746.469	810.147	813.918		140.092	284.235	286.697	285.489	283.988	289.612	290.564	288.758	287.124	287.202	289.748		134.079	453.856	467.122	449.764	472.303	531.647	502.481		133.148	1007.43	1209.53	965.889	1026.13	1020.02	998.155		139.236	1052.55	933.443	1037.06	995.293	1135.28	888.28
140.406	864.773	798.634	746.351	809.583	816.33		141.115	283.485	288.542	285.932	285.259	291.086	290.513	288.402	287.371	288.607	291.161		135.079	452.107	464.422	447.985	466.401	529.765	501.802		134.148	1005.91	1178.89	970.494	1026.56	1024.21	1002.3		140.408	1054.46	936.643	1040.2	996.969	1138.17	888.94
141.429	865.828	801.501	745.179	807.95	812.098		142.138	285.272	287.768	286.626	285.104	290.581	290.863	290.636	286.594	287.986	291.485		136.079	452.472	463.719	450.028	467.831	529.057	502.202		135.148	1007.17	1164.63	972.364	1034.93	1029.43	1001.46		141.432	1049.64	934.142	1035.01	991.512	1134.54	886.344
142.452	862.767	799.039	745.765	808.947	812.671		143.161	284.533	287.708	285.928	285.461	290.072	289.541	288.179	286.394	288.02	290.331		137.079	456.409	468.363	451.542	471.022	535.206	507.613		136.148	1004.97	1145.58	969.047	1033.1	1029.16	997.865		142.455	1055.77	936.631	1037.46	995.153	1136.78	887.147
143.475	869.159	801.531	745.557	811.263	812.284		144.184	285.571	288.656	286.438	285.101	289.548	290.073	289.19	286.429	287.9	289.945		138.079	453.858	465.927	449.871	467.398	532.31	503.7		137.148	1007.24	1148.79	972.846	1038.97	1036.17	1000.82		143.478	1054.87	940.248	1037.7	996.412	1138.64	888.224
144.498	870.452	803.954	747.689	809.664	815.531		145.207	284.469	288.361	286.674	284.888	290.896	290.49	289.34	286.656	287.964	290.031		139.079	449.557	463.437	445.631	463.603	528.909	499.991		138.148	1014.5	1160.28	981.253	1044.62	1043.37	1006.19		144.501	1054.27	938.277	1038.2	993.859	1138.06	887.271
145.522	872.295	804.287	746.735	806.987	814.058		146.23	284.107	289.095	286.513	285.299	291.958	290.608	290.334	286.806	287.518	291.378		140.079	456.341	468.671	451.505	470.232	535.714	507.137		139.149	1013.67	1174.24	978.096	1048.92	1045.22	1003.24		145.524	1056.81	941.032	1039.12	994.409	1140.58	889.779
146.545	872.995	805.663	747.032	810.742	817.798		147.253	284.162	286.537	285.777	284.664	289.202	290.698	290.473	285.857	287.768	290.419		141.08	453.747	464.053	448.199	465.225	532.446	503.154		140.148	1013.92	1196.45	979.337	1045.47	1049.04	1002.36		146.547	1054.05	940.331	1040.14	993.179	1138.76	888.401
147.568	872.984	805.832	746.07	808.754	814.3		148.276	283.425	288.371	286.11	284.91	289.31	290.344	289.649	288.578	288.917	290.041		142.105	452.659	464.473	445.995	466.13	531.292	504.983		141.148	1016.18	1214.53	982.823	1049.73	1050.54	1002.54		147.57	1051.65	942.381	1037.73	992.982	1138.93	887.892
148.588	874.395	806.109	746.552	808.916	814.554		149.299	284.446	288.403	287.368	284.288	289.446	291.714	289.35	286.808	288.775	291.018		143.128	454.19	466.578	448.518	468.212	534.799	505.958		142.148	1021.99	1241.41	983.419	1052.76	1053.93	1005.62		148.593	1055.99	947.407	1041.03	995.436	1143.1	890.298
149.611	875.243	810.116	746.185	808.5	816.222		150.317	286.494	288.242	285.069	284.31	290.83	289.366	289.834	287.502	288.368	292.276		144.154	447.992	461.463	443.314	463.029	527.266	502.168		143.148	1018.53	1253.59	979.763	1052.2	1053.58	1003.47		149.616	1059.91	947.01	1041.12	997.156	1144.09	890.503
150.634	880.087	815.464	747.849	810.92	819.162		151.34	284.961	288.722	286.925	284.839	290.967	290.959	289.564	287.064	288.377	291.408										144.148	1020.73	1273.36	981.222	1056.35	1052.66	1005.83		150.639	1051.83	946.075	1039.75	993.547	1142.36	885.812
151.657	881.206	810.815	745.836	809.794	817.59		152.363	285.017	288.714	285.611	284.45	289.19	289.792	290.245	285.853	287.608	290.48										145.148	1023.09	1290.68	983.295	1052.95	1050.05	1009.4		151.662
152.68	881.48	817.547	747.521	813.676	819.816		153.386	284.276	287.975	285.949	284.625	290.517	291.672	289.948	287.309	288.849	290.554										146.148	1020.59	1299.55	978.337	1047.25	1039.38	1005.77		152.685
153.703	882.557	816.352	749.142	814.566	820.025		154.404	285.025	287.684	285.947	283.464	290.242	290.29	288.819	287.336	289.24	290.493										147.148	1014.31	1304.92	976.15	1042.98	1027.86	1000.15		153.708
154.726	881.7	818.79	748.577	812.466	820.322		155.422	283.927	287.988	287.672	285.411	291.039	289.025	289.65	286.489	287.729	291.201										148.148	1015.16	1316.33	979.465	1040.57	1024.36	1004.96		154.731
155.744	881.973	818.434	747.019	808.443	818.691		156.445	285.599	286.876	286.357	284.605	289.43	291.404	288.922	285.389	287.775	291.309										149.324	1014.57	1326.06	978.392	1037.56	1019.65	1003.85		155.754
156.761	885.403	822.588	751.669	811.58	824.588		157.468	285.273	288.686	286.692	284.262	289.634	289.487	288.853	287.788	289.586	291.511										150.32	1011.59	1328.39	984.771	1036.81	1017.36	1001.6		156.777
157.784	888.721	827.8	752.008	815.73	826.199		158.491	286.36	287.91	287.378	285.493	289.774	290.972	290.514	286.432	288.128	289.798										151.316	1008.72	1327.88	982.646	1034.55	1017.03	1003.67		157.8
158.808	885.183	820.624	747.45	808.35	822.046		159.514	285.566	289.372	285.681	284.521	290.303	290.733	288.335	288.05	290.15	290.496										152.312	1003.67	1320.99	982.232	1028.2	1013.02	1000.73		158.824
159.831	883.807	821.621	749.729	811.916	821.653		160.537	284.075	288.85	286.129	283.738	290.235	290.301	289.256	285.051	288.432	290.195										153.303	1001.84	1317.24	985.829	1030.87	1019.13	1004.73		159.848
160.854	889.801	828.256	752.597	813.534	822.118		161.56	284.045	287.393	285.952	284.423	289.108	291.454	290.368	286.595	287.029	291.098										154.295	1001.22	1302.9	986.622	1027.71	1020.64	1000.84		160.88
161.877	890.987	826.771	752.198	814.548	823.89		162.582	285.024	290.642	286.954	284.976	289.578	290.481	290.829	288.637	288.845	291.901										155.29	998.762	1278.48	985.05	1021.7	1022.45	993.341		161.904
162.895	887.62	823.257	749.439	811.82	819.683		163.605	284.455	288.394	287.098	286.022	291.39	290.33	288.945	288.125	289.958	291.628										156.286	999.952	1252.62	986.902	1023.44	1029.52	992.1		162.927
163.918	890.019	829.625	750.362	813.883	822.709		164.628	285.412	288.769	286.376	285.42	289.873	290.564	289.749	286.795	289.301	290.966										157.282	995.628	1214.76	985.036	1025.7	1032.7	992.914		163.952
164.94	888.638	828.364	750.483	813.582	820.155		165.651	284.97	288.045	286.706	285.615	291.049	290.293	289.413	286.854	289.12	291.819										158.279	1007.47	1186.11	989.89	1033.01	1044.25	1002.32		164.976
165.958	892.384	833.412	750.582	815.356	824.656		166.674	284.764	289.3	286.796	286.965	291.062	290.709	289.524	287.41	288.576	291.881										159.276	1001.45	1151.55	988.164	1027.56	1044.97	992.24		166.001
166.981	890.787	835.658	753.307	816.229	822.556		167.697	286.167	289.32	286.82	285.063	291.645	292.019	290.204	287.425	288.93	290.997										160.272	1004.92	1137.38	984.579	1026.15	1049.56	995.909		167.026
168.004	889.298	834.493	754.436	816.306	825.494		168.72	285.134	288.9	286.761	286.392	290.59	291.464	290.812	286.786	287.39	292.255										161.267	1007.21	1130.02	986.636	1025.74	1051.64	995.55		168.05
169.027	888.834	836.479	750.329	812.635	824.297		169.733	285.841	288.57	286.995	286.805	290.378	290.773	289.234	287.628	289.779	290.964										162.264	1011.53	1143.39	987.012	1030.56	1051.25	999.756		169.071
170.05	893.011	839.1	757.215	817.722	825.473		170.756	285.781	288.076	286.368	285.304	289.97	290.168	289.518	287.68	287.853	291.002																		170.095
171.073	896.05	843.074	757.48	817.042	825.961		171.774	285.298	287.933	288.602	285.804	291.075	290.886	290.334	287.504	288.588	291.542																		171.118
172.561	895.499	839.309	754.829	818.829	825.6		172.797	285.549	290.024	287.421	285.758	290.517	292.179	288.809	287.132	289.154	291.448																		172.142
173.732	895.667	841.225	755.317	816.256	826.269		173.82	285.613	289.411	286.236	284.039	290.881	291.175	289.842	287.022	288.746	292.739																		173.166
							174.843	283.601	288.873	287.061	284.232	293.38	290.978	290.329	287.52	289.204	292.264																		174.191
							175.866	285.652	289.894	288.035	285.71	291.49	292.286	290.428	286.215	289.063	290.687																		175.211
							176.889	283.973	288.035	287.37	285.897	291.052	290.54	289.6	289.026	289.576	290.798																		176.229
							177.912	287.144	288.622	286.878	285.533	291.537	291.477	291.089	287.397	288.571	293.337																		177.252
							178.934	287.008	290.011	286.837	285.659	291.462	291.269	293.358	289.516	288.779	290.325																		178.275
							179.957	284.239	287.517	286.683	284.797	290.371	291.105	291.08	287.848	289.426	292.263																		179.298

## Sheet: 10 uM ATP (fura2)
Rel. Time (s)	Mean of ROI Object 1 (Fura 2)	Mean of ROI Object 2 (Fura 2)	Mean of ROI Object 3 (Fura 2)	Mean of ROI Object 4 (Fura 2)	Mean of ROI Object 5 (Fura 2)		Rel. Time (s)	Mean of ROI Object 1 (Luc)	Mean of ROI Object 2 (Luc)	Mean of ROI Object 3 (Luc)	Mean of ROI Object 4 (Luc)	Mean of ROI Object 5 (Luc)	Mean of ROI Object 6 (Luc)	Mean of ROI Object 7 (Luc)	Mean of ROI Object 8 (Luc)		Rel. Time (s)	Mean of ROI Object 1 (Fura 2)	Mean of ROI Object 2 (Fura 2)	Mean of ROI Object 3 (Fura 2)	Mean of ROI Object 4 (Fura 2)	Mean of ROI Object 5 (Fura 2)	Mean of ROI Object 6 (Fura 2)	Mean of ROI Object 7 (Fura 2)	Mean of ROI Object 8 (Fura 2)	Mean of ROI Object 9 (Fura 2)	Mean of ROI Object 10 (Fura 2)	Mean of ROI Object 11 (Fura 2)	Mean of ROI Object 12 (Fura 2)		Rel. Time (s)	Mean of ROI Object 1 (Fura 2)	Mean of ROI Object 2 (Fura 2)	Mean of ROI Object 3 (Fura 2)	Mean of ROI Object 4 (Fura 2)	Mean of ROI Object 5 (Fura 2)	Mean of ROI Object 6 (Fura 2)	Mean of ROI Object 7 (Fura 2)	Mean of ROI Object 8 (Fura 2)	Mean of ROI Object 9 (Fura 2)
0	1024.54	967.353	976.795	1016	1176.44		0	1046.27	1052.86	936.997	1091.06	1027.3	1159.61	992.064	1091.6		0	853.836	852.04	788.378	838.721	791.069	854.563	881.119	772.738	932.842	934.036	962.71	876.998		0	894.353	886.54	1009.7	927.178	956.267	992.762	1215.72	928.037	802.79
1.37595	1024.61	966.917	980.915	1014.3	1179.89		1.16287	1046.88	1051.56	936.294	1087.76	1024.56	1158.68	991.842	1089.85		1.17296	852.666	851.8	784.851	833.187	788.656	852.901	880.168	768.508	927.459	929.638	958.566	878.058		1.25656	894.07	889.328	1008.82	930.327	952.742	990.308	1213.22	927.915	802.441
2.54659	1024.53	965.039	984.343	1010.54	1184.1		2.15853	1043.92	1049.51	933.929	1087.17	1024.57	1156.56	989.594	1090.92		2.34364	851.242	850.891	783.039	833.195	787.836	854.027	878.086	767.358	926.534	927.743	955.415	876.17		2.42766	895.344	889.127	1009.37	930.113	955.853	995.217	1217.71	928.514	802.499
3.71621	1023.86	966.361	985.049	1008.64	1180.81		3.15704	1046.39	1051.03	936.21	1087.7	1024.55	1155.99	988.746	1090.8		3.51602	853.918	855.7	784.843	833.547	789.159	852.879	881.778	769.381	931.276	930.267	957.714	877.409		3.59965	891.651	888.074	1008.98	926.147	950.039	988.832	1213.95	923.62	798.739
4.88673	1024.22	967.299	989.134	1007.33	1184.27		4.15523	1043.53	1048.08	935.659	1084.05	1021.75	1156.93	986.593	1088.07		4.68567	849.29	848.737	780.123	829.087	784.197	845.554	876.628	766.791	922.452	922.881	948.419	869.824		4.77084	894.109	888.662	1014.57	929.202	952.4	989.385	1215.55	925.939	801.679
6.05683	1024.16	966.471	995.383	1008.06	1189.63		5.15283	1045.26	1047.58	937.062	1085.55	1024.35	1156.04	987.521	1090.19		5.85676	845.838	843.561	777.198	823.669	778.253	843.357	872.938	760.622	915.408	917.713	943.863	868.274		5.94275	896.174	891.154	1020.26	931.672	956.38	996.622	1219.9	928.732	804.369
7.22794	1023.62	967.28	995.751	1005.51	1192.56		6.15087	1044.52	1048.48	934.65	1085.59	1023.27	1157.05	989.941	1091.2		7.02744	847.971	848.156	779.803	827.677	781.813	847.23	875.839	767.841	919.468	922.969	946.542	868.456		7.1144	897.96	890.048	1019.36	929.543	953.772	994.185	1217.49	930.204	804.269
8.39876	1024	967.331	1001.18	1004.89	1192.35		7.14871	1043.98	1050.79	931.224	1084.81	1020.26	1155.6	988.003	1091.37		8.1935	850.601	849.812	780.899	828.391	786.573	849.477	879.436	767.961	924.621	926.307	948.375	870.771		8.28504	893.348	885.419	1013.55	929.816	950.554	988.281	1211.11	926.389	800.755
9.56347	1026.75	970.073	1005.83	1005.86	1195.31		8.14715	1048.79	1050.94	936.742	1088.24	1022.73	1160.05	991.612	1093.92		9.36483	851.141	852.417	782.68	829.914	786.327	853.806	883.981	769.11	923.643	927.936	951.304	873.804		9.45537	892.202	885.179	1016.4	928.324	950.314	988.226	1212.84	926.751	802.938
10.7327	1024.21	968.375	1005.5	1006.71	1193.13		9.1454	1044.16	1050.44	930.572	1080.32	1019.13	1153.75	984.881	1091.74		10.5297	851.673	852.608	782.876	831.146	787.368	850.642	887.294	768.276	925.228	928.749	952.229	875.486		10.6253	894.968	886.107	1015.49	930.783	950.662	988.544	1218.64	926.666	801.29
11.9027	1022.75	971.324	1009.76	1007.08	1194.72		10.1441	1048.32	1051.3	935.744	1087.71	1023.77	1160.66	989.795	1097.47		11.7007	849.749	850.282	780.378	828.205	784.726	848.567	883.802	769.228	924.385	925.147	948.171	870.66		11.795	893.686	888.181	1014.26	936.134	950.279	990.862	1219.4	926.729	800.869
13.0725	1023.41	973.162	1007.92	1004.54	1196.53		11.142	1048.72	1050.51	934.747	1086.45	1024.68	1159.89	991.308	1097.82		12.8709	856.49	851.952	783.152	829.927	790.152	852.974	887.666	770.083	925.475	927.782	951.3	875.846		12.9662	891.941	886.82	1014.45	932.626	951.451	991.073	1219.16	926.576	802.161
14.2436	1023.09	973.118	1012.96	1004.67	1198.11		12.1404	1043.18	1046.69	933.9	1080.91	1019.32	1156.29	987.283	1091.09		14.0409	854.045	852.667	784.632	830.593	788.558	851.617	886.086	769.303	925.114	929.182	951.897	876.986		14.1373	894.225	888.114	1017.61	933.665	949.861	990.09	1219.35	928.025	801.513
15.4137	1019.12	970.205	1010.72	1003.92	1194.61		13.1381	1045.15	1048.87	934.5	1084.21	1020.45	1155.69	987.074	1092.92		15.212	851.003	849.045	779.127	828.732	786.823	851.365	883.697	769.71	923.105	924.21	945.466	871.96		15.3082	892.699	888.769	1016.35	933.68	950.537	989.931	1219.7	928.182	802.789
16.5844	1021.81	973.774	1015.19	1007.57	1199.2		14.1364	1045.69	1049.58	934.701	1084.88	1021.7	1159.69	989.812	1095.81		16.3828	886.595	894.195	822.489	873.142	828.739	894.222	928.732	811.401	1032.56	977.533	993.562	919.643		16.4787	911.4	897.383	1013.74	946.297	962.601	1004.64	1229.44	942.807	817.71
17.7545	1108.45	1001.51	1037.05	1032.23	1230.8		15.1345	1044.23	1047.26	935.656	1084.34	1022.28	1155.97	989.371	1095.41		17.5536	834.547	824.446	823.68	811.476	826.902	852.237	865.884	804.061	962.098	959.341	959.046	909.253		17.6488	915.281	902.423	1020.65	952.967	966.144	1011.49	1240.21	949.663	823.09
18.9246	1090.9	893.826	853.172	1013.78	1226.82		16.1327	1044.86	1049.36	933.666	1082.78	1018.76	1155.25	990.058	1095.89		18.7239	776.894	819.709	805.074	796.995	799.812	825.243	808.404	788.622	852.202	854.286	865.933	828.948		18.8148	915.1	903.805	1017.62	948.208	972.628	1012.48	1239.91	954.465	823.445
20.0941	886.673	818.034	823.828	801.059	1062.49		17.1312	1041.17	1046.68	931.234	1081.57	1018.19	1151.36	984.879	1092.25		19.8948	771.535	817.174	797.442	794.592	799.143	821.593	805.248	784.296	846.713	845.882	859.396	820.934		19.9862	890.158	897.769	1008.93	940.008	967.338	1007	1231.17	945.477	819.09
21.265	856.086	816.433	820.408	795.415	883.069		18.1293	1046.29	1047.43	934.104	1082.22	1020.61	1154.56	991.402	1094.58		21.0645	767.659	812.782	793.263	793.908	794.318	820.261	803.1	782.561	841.775	845.334	861.691	821.211		21.1528	794.035	888.873	1005.7	932.987	957.506	1002.79	1216.55	923.226	797.024
22.4345	842.825	817.333	822.773	799.057	881.903		19.1266	1046.5	1049	932.158	1079.55	1016.15	1153.82	987.186	1091.93		22.2347	769.269	815.954	794.192	792.617	797.587	821.69	804.157	783.551	843.917	847.944	862.412	821.8		22.3234	781.271	818.147	995.48	833.881	800.787	978.355	904.861	816.381	776.778
23.604	837.588	817.09	826.042	801.441	885.055		20.125	1008.08	1008.45	891.223	1049.25	981.362	1117.9	935.327	1038.72		23.4046	772.232	816.809	791.008	791.64	798.69	820.099	804.297	787.517	844.789	849.064	862.679	820.327		23.494	783.399	811.208	842.377	823.48	796.433	837.552	896.022	814.933	775.591
24.7747	831.284	816.299	822.177	798.561	886.743		21.1231	990.675	995.427	881.064	1045.95	973.097	1107.21	926.835	1033.58		24.5748	771.483	816.407	791.876	794.078	800.069	823.164	805.511	785.72	846.951	849.027	864.225	822.853		24.6638	782.403	808.555	837.354	825.182	795.066	832.497	896.614	816.135	775.073
25.9448	834.927	815.26	818.467	799.124	889.763		22.121	961.039	965.794	850.066	1022.49	930.968	1066.68	896.361	1001.14		25.7472	769.536	813.543	789.595	789.747	795.498	818.292	803.866	782.597	844.699	848.289	863.446	821.85		25.8335	781.906	805.258	834.32	821.016	796.482	831.007	897.163	810.992	773.942
27.1143	829.801	814.814	817.917	800.972	895.231		23.119	932.198	937.319	822.212	991.636	899.173	1035.56	860.575	893.483		26.7708	769.166	813.133	789.642	790.408	795.911	820.183	803.822	784.056	844.127	850.669	862.596	820.738		27.0043	782.571	805.798	833.171	822.536	799.351	828.175	904.698	814.307	770.581
28.2847	829.03	818.112	819.217	801.943	902.276		24.1168	856.039	897.238	782.739	948.522	854.429	990.217	780.875	798.443		27.7888	771.072	815.11	789.649	791.145	797.381	821.254	801.863	785.301	847.39	850.39	863.994	822.436		28.1701	780.229	805.705	838.455	823.218	804.195	833.28	907.743	816.054	772.936
29.455	821.433	819.2	819.431	803.055	903.375		25.1149	669.678	685.887	658.795	850.893	765.798	892.008	695.185	719.421		28.8118	769.402	813.758	788.929	790.778	795.231	818.985	802.639	783.417	845.848	847.934	863.738	818.569		29.3414	777.928	803.285	835.442	822.034	803.846	830.501	909.446	811.825	769.717
30.4799	824.991	818.902	818.421	803.336	902.655		26.1132	612.421	623.483	597.023	640.768	630.85	654.273	639.043	655.149		29.8348	767.767	810.328	787.086	787.381	795.015	816.489	797.509	783.161	842.479	845.589	858.589	817.178		30.5127	778.269	803.768	835.453	823.092	803.719	832.253	909.415	812.317	766.417
31.5029	826.223	818.135	816.962	802.92	902.254		27.0117	598.175	613.226	591.215	618.023	609.326	640.396	627.939	642.123		30.8568	765.345	810.323	787.059	786.928	792.826	817.393	801.004	780.624	841.764	843.683	862.187	815.72		31.683	777.326	802.873	837.243	821.349	808.053	833.944	908.101	810.727	767.24
32.5259	826.332	818.985	818.805	800.446	909.874		28.0116	595.453	609.508	588.869	612.463	608.267	640.573	623.437	642.212		31.8798	766.948	809.654	785.634	787.549	796.28	819.265	799.131	783.375	842.073	843.853	863.803	816.973		32.855	779.751	802.265	836.566	818.641	806.058	834.543	906.25	810.08	768.646
33.5489	817.046	814.602	814.327	802.033	906.127		29.0116	595.361	608.809	591.071	617.808	608.571	643.014	624.204	643.01		32.9028	769.144	811.93	788.027	790.418	796.771	821.086	802.314	784.074	840.673	845.725	865.819	819.75		33.8781	778.168	802.648	835.902	819.127	802.256	831.694	904.566	810.651	767.031
34.5719	826.876	820.917	817.937	804.078	911.221		30.0116	595.639	611.214	595.385	622.36	612.206	646.851	625.787	645.568		33.9199	767.253	812.304	786.34	788.886	793.027	817.086	801.29	781.636	839.126	842.77	863.752	817.147		34.9011	779.12	802.395	834.753	817.794	798.661	833.776	902.37	812.187	768.847
35.5939	819.739	822.769	818.741	805.747	915.078		31.0116	595.171	611.772	597.31	621.4	613.152	647.812	626.901	646.665		34.9428	767.056	809.512	783.232	785.826	791.968	816.303	796.764	778.732	836.361	841.1	862.366	815.815		35.9241	777.628	802.517	834.789	816.31	795.669	829.816	897.839	808.306	767.37
36.6169	821.893	818.872	819.045	806.09	915.202		32.0116	596.509	614.568	599.658	623.799	615.765	651.717	632.046	650.049		35.9659	766.439	812.103	787.053	786.414	793.269	815.984	799.374	781.833	836.928	840.625	863.846	814.256		36.9461	780.257	804.47	833.473	817.945	796.651	832.773	899.88	812.397	769.074
37.6349	826.728	821.215	818.781	806.986	916.705		33.0116	597.002	615.381	602.624	627.371	617.813	655.067	634.29	650.715		36.9878	765.076	811.186	786.254	786.131	794.759	817.289	800.562	782.605	837.727	842.423	863.703	814.734		37.9691	778.83	802.036	833.385	817.293	793.397	830.138	899.355	811.725	766.975
38.6579	826.057	819.585	820.096	804.784	920.165		34.0116	596.83	615.233	603.717	625.727	618.382	655.287	635.743	652.125		38.0108	765.856	811.781	786.249	783.527	792.107	815.497	800.474	780.908	836.173	838.931	867.472	813.828		38.9921	784.158	804.885	835.333	820.186	797.135	831.759	900.682	812.329	772.1
39.6809	825.655	821.294	820.395	807.125	923.224		35.0116	598.848	616.245	606.439	626.473	619.878	655.913	638.141	654.237		39.0338	767.292	809.923	781.348	785.016	793.599	813.725	798.185	780.153	834.665	838.168	863.951	811.487		40.0151	781.329	802.986	834.81	819.612	796.49	831.798	900.063	811.429	769.092
40.7039	820.659	819.234	821.89	808.154	922.999		36.0116	599.517	619.492	606.715	629.814	620.143	657.134	639.504	655.596		40.0568	763.979	810.384	783.335	785.771	790.176	814.343	797.259	778.727	834.03	836.116	864.927	812.727		41.0381	781.807	806.355	834.128	821.116	796.682	833.259	899.417	814.442	769.445
41.7269	824.124	819.261	821.937	807.647	921.664		37.0116	602.463	617.856	610.123	628.707	621.561	657.396	640.276	656.672		41.0798	764.293	808.722	783.735	783.965	790.151	811.956	794.923	777.061	834.663	838.719	866.34	810.222		42.0611	783.749	804.518	838.162	821.649	800.135	835.389	906.811	814.836	771.907
42.7499	821.903	819.036	821.493	810.875	924.219		38.0116	606.541	624.343	613.205	628.893	625.839	661.325	640.786	658.55		42.1029	765.42	808.517	784.065	784.3	788.4	813.046	797.307	777.588	833.515	839.263	865.45	812.747		43.0841	784.345	806.92	836.135	819.285	803.07	836.025	904.655	813.164	770.449
43.7729	818.567	817.936	819.535	809.424	922.969		39.0116	607.124	621.595	610.891	627.582	623.149	657.741	640.259	652.416		43.1209	765.224	808.428	783.23	783.628	789.238	811.893	797.964	778.125	836.059	838.441	866.66	812.981		44.1061	783.924	804.325	835.988	821.968	805.902	836.131	906.961	813.312	770.043
44.796	824.377	823.283	823.367	815.171	926.446		40.0116	605.553	619.354	609.005	626.398	616.877	651.48	633.473	645.614		44.1388	766.541	809.169	782.612	784.63	788.474	812.3	797.686	777.69	836.233	841.48	870.585	811.256		45.1291	788.313	809.236	840.476	823.831	808.585	839.899	916.11	818.406	772.392
45.8189	824.307	816.714	821.731	811.122	924.073		41.0116	605.559	618.834	603.236	622.504	615.834	645.534	625.331	635.303		45.1608	766.113	811.709	784.878	786.506	790.566	814.992	798.813	778.321	838.762	839.405	868.48	814.358		46.1521	787.425	807.002	837.805	821.364	806.821	839.977	915.153	815.007	770.557
46.8419	821.535	819.418	822.497	811.32	925.258		42.0116	598.234	610.99	598.967	612.263	603.93	635.126	609.289	621.326		46.1848	764.697	809.019	783.136	782.518	790.646	813.138	797.113	777.5	835.597	838.497	867.923	811.55		47.1751	788.769	807.472	841.342	823.304	808.334	840.95	915.219	814.328	772.151
47.8649	819.91	821.547	823.063	814.264	929.317		43.0116	591.593	601.7	589.069	603.697	592.688	619.868	592.154	600.025		47.2098	764.063	810.683	784.126	785.626	790.533	813.079	797.551	776.473	836.478	838.816	870.236	811.472		48.1981	788.442	806.001	841.726	822.551	808.267	840.025	914.525	817.037	771.646
48.888	813.629	818.359	822.11	812.956	930.523		44.0116	580.895	590.514	573.119	585.956	576.048	603.881	570.516	580.784		48.2338	763.504	805.314	783.111	781.541	789.911	811.792	796.195	775.065	834.48	837.283	870.884	810.303		49.2211	787.638	808.675	843.611	824.799	808.958	844.297	913.023	816.478	773.915
49.911	817.107	818.718	825.863	814.076	935.439		45.0116	571.36	578.447	558.473	569.334	559.951	585.369	553.029	563.305		49.2568	759.856	808.083	779.886	780.495	785.863	809.561	794.514	774.066	833.057	836.697	866.669	807.283		50.2391	789.51	811.162	846.708	827.276	811.503	846.643	914.663	816.642	773.839
50.9339	813.85	820.35	823.34	814.571	936.436		46.0116	556.202	562.668	541.142	552.223	542.163	567.903	534.915	549.071		50.2819	764.246	807.008	778.462	782.251	788.95	810.586	794.486	775.303	835.451	838.263	869.227	807.344		51.2621	787.256	808.683	845.886	825.798	807.639	848.634	909.853	816.341	773.568
51.9559	816.206	818.079	828.267	816.573	939.939		47.0116	541.911	546.026	525.893	538.428	529.883	554.172	523.294	537.263		51.3068	764.54	809.054	780.752	782.819	787.77	811.076	794.578	774.642	835.131	838.853	869.832	808.463		52.2861	788.863	807.023	847.438	824.332	807.897	846.046	908.824	816.414	771.585
52.9789	811.613	819.491	825.937	816.683	938.009		48.0116	532.032	535.891	513.822	533.217	524.065	543.961	516.341	530.189		52.3308	762.699	806.042	778.569	783.561	786.09	808.372	797.376	777.425	834.086	835.731	869.965	807.959		53.3091	790.934	807.807	844.731	826.35	804.282	846.374	909.553	816.481	772.547
54.0019	813.923	819.174	826.366	817.012	935.795		49.0116	517.973	524.258	503.269	527.809	511.458	534.865	506.249	520.079		53.3548	762.114	804.777	777.914	779.354	786.373	808.503	794.636	771.386	831.089	834.495	870.464	806.057		54.3281	792.169	811.538	845.287	826.442	807.101	850.036	915.071	818.558	774.206
55.0239	809.269	818.605	825.768	815.342	934.756		50.0116	508.785	515.523	494.578	521.897	505.923	526.495	503.121	515.927		54.3788	766.297	809.884	782.448	783.636	788.778	809.361	796.131	776.461	838.209	837.621	874.154	809.399		55.3511	792.946	812.142	848.093	828.738	810.361	851.739	919.527	820.599	775.423
56.047	811.833	820.092	828.344	818.983	937.494		51.0066	502.603	509.06	489.249	511.648	497.822	519.036	498.331	511.863		55.4038	764.5	807.094	782.487	782.781	786.391	808.548	795.924	773.712	834.307	835.614	872.926	809.566		56.3742	790.672	808.796	840.632	827.337	806.97	848.5	917.359	818.296	773.636
57.069	812.538	817.873	825.232	815.623	941.463		52.0116	495.116	502.492	483.958	504.777	493.041	513.678	495.3	506.429		56.4379	761.205	806.822	780.622	779.841	785.29	808.937	795.004	773.412	833.494	836.72	871.995	807.51		57.397	791.587	812.939	845.007	829.993	810.351	851.442	924.936	821.405	775.56
58.0919	812.344	821.542	826.451	819.499	943.934		53.0116	493.517	498.832	478.829	499.586	488.558	511.361	487.947	502.32		57.4648	762.056	804.992	779.546	778.973	784.373	806.28	792.157	770.429	831.172	834.254	872.212	806.524		58.4201	794.687	813.547	844.28	827.16	813.221	849.003	925.436	821.186	776.537
59.1149	812.034	820.601	826.157	818.236	943.537		54.0116	492.8	497.378	477.715	498.973	487.117	511.731	487.189	503.195		58.4898	764.091	809.229	781.263	781.587	788.083	810.027	796.352	773.653	832.259	836.511	875.894	807.172		59.4431	794.058	815.661	849.926	830.412	817.151	850.282	929.727	824.194	778.234
60.1379	816.717	823.779	826.219	822.107	952.368		55.0116	485.581	492.103	473.507	495.236	485.754	508.185	480.245	498.856		59.5148	762.354	805.32	782.012	780.795	783.505	806.979	791.498	771.51	831.625	835.497	872.127	805.784		60.4661	794.99	814.622	849.386	828.599	814.826	846.91	928.382	824.341	778.871
61.1609	815.867	819.154	823.293	820.81	949.731		56.0116	484.107	490.893	471.498	491.986	484.153	507.575	478.29	497.278		60.5398	759.863	807.369	777.971	776.032	780.903	805.459	791.48	768.873	828.58	832.745	876.309	804.592		61.4891	795.028	816.943	849.255	832.069	818.334	846.317	927.512	825.934	778.304
62.1839	818.117	820.627	826.459	819.693	955.315		57.0116	482.743	488.992	471.823	490.493	482.971	505.242	476.032	498.88		61.5638	765.536	809.14	780.785	782.503	786.736	807.282	794.32	774.594	832.6	837.497	879.363	810.16		62.5121	795.447	819.009	850.915	831.911	820.786	846.585	925.694	823.802	777.827
63.209	819.944	821.985	829.449	823.937	957.545		58.0116	480.485	486.825	472.495	490.768	481.839	503.415	473.695	495.036		62.5889	763.385	805.693	778.829	781.029	783.784	805.832	792.809	772.134	832.735	835.048	877.934	806.255		63.5351	792.028	815.822	849.927	830.717	817.652	844.222	924.354	823.311	776.31
64.2329	821.536	820.515	828.295	823.297	959.284		59.0116	478.211	485.731	466.536	488.699	479.518	502.302	470.659	493.651		63.6139	761.046	807.181	779.734	778.299	782.266	805.909	791.657	770.513	829.562	835.669	875.919	803.017		64.5581	793.649	816.954	850.15	831.459	818.856	845.44	924.372	825.903	778.151
65.2579	814.288	819.497	826.09	822.674	958.184		60.0116	477.15	484.293	468.299	489.975	479.669	502.992	471.144	493.864		64.6388	761.466	806.701	779.956	778.428	782.467	807.057	793.589	768.635	828.788	834.729	878.301	803.538		65.5812	797.052	816.967	851.259	829.529	818.907	850.473	921.507	827.198	777.178
66.281	816.84	817.72	824.663	821.602	962.988		61.0116	477.029	484.812	469.985	488.264	479.468	501.465	469.662	494.692		65.6639	762.201	808.395	781.64	779.573	782.536	806.824	793.015	769.093	830.988	835.471	882.117	805.245		66.6051	798.746	819.058	853.774	831.588	824.11	853.313	926.749	828.769	781.809
67.3039	818.151	819.366	827.401	823.086	967.59		62.0116	474.622	482.836	465.404	485.049	476.508	500.67	469.695	492.902		66.6878	761.703	806.497	780.066	779.036	785.246	805.242	792.197	770.67	832.375	835.053	882.189	806.164		67.6291	793.852	818.368	852.589	830.026	818.781	852.644	924.449	825.263	779.745
68.3259	819.586	822.388	829.747	825.347	971.925		63.0116	475.119	483.755	475.317	488.521	479.707	500.006	467.921	495.1		67.7128	761.845	806.743	779.901	779.089	784.85	806.408	792.849	770.242	833.344	835.108	882.356	807.226		68.6591	796.584	821.492	855.119	833.195	822.212	858.163	925.575	826.555	780.034
69.3499	820.142	820.1	829.202	826.288	972.219		64.0116	476.791	483.799	478.052	488.298	480.944	500.277	469.178	493.642		68.7369	759.264	805.677	778.669	776.883	782.374	803.057	788.205	768.785	829.683	831.839	880.797	803.852		69.6821	800.314	821.68	856.097	832.805	821.749	862.718	924.634	825.961	779.591
70.3739	821.145	820.114	829.222	824.642	974.036		65.0117	472.937	482.166	470.07	487.952	479.653	500.89	467.568	493.669		69.7608	765.239	809.585	782.438	783.339	787.016	809.795	795.819	772.76	834.8	837.846	884.602	810.392		70.7071	799.457	821.634	853.124	833.249	821.861	861.643	928.229	826.539	778.777
71.3989	820.103	818.978	829.144	826.964	979.297		66.0066	472.715	485.385	479.912	489.179	482.247	501.21	465.267	493.523		70.7858	763.032	807.456	780.126	778.81	783.176	804.507	793.701	769.467	831.871	835.513	886.799	808.877		71.7321	800.555	824.119	856.338	837.009	825.259	862.968	931.866	827.977	781.758
72.4249	823.943	820.961	830.741	826.599	984.663		67.0116	473.234	483.717	479.116	489.819	482.046	499.073	468.105	494.782		71.8088	761.645	806.364	781.174	779.49	784.819	807.49	794.021	769.785	830.729	834.775	885.726	806.595		72.7511	799.537	824.566	853.431	835.626	826.092	862.212	932.355	830.236	779.761
73.4489	824.28	819.914	830.027	828.436	986.361		68.0116	472.709	482.78	476.428	489.317	481.785	499.518	466.532	494.687		72.8319	760.043	805.907	779.178	776.557	781.572	805.212	791.001	766.656	828.174	834.063	883.497	805.685		73.7761	799.994	826.662	855.641	836.139	827.152	860.202	933.12	827.531	782.556
74.474	823.655	819.123	829.95	829.206	986.845		69.0116	471.98	483.283	472.141	489.313	484.962	502.678	465.402	494.822		73.8569	763.331	808.556	783.042	779.536	783.45	806.304	793.277	769.196	834.272	836.414	886.164	809.15		74.8002	802.093	825.493	852.824	837.161	827.042	858.19	937.102	828.094	781.475
75.498	826.388	818.415	833.065	829.642	989.283		70.0116	472.508	482.388	470.01	489.128	484.873	500.003	467.661	494.509		74.8818	764.747	810.168	784.722	783.7	783.672	808.279	795.942	770.897	834.77	839.771	888.245	806.471		75.8251	797.708	825.33	849.151	834.609	827.467	853.263	935.763	827.486	782.266
76.524	826.798	821.21	827.744	829.551	991.434		71.0116	471.862	482.9	469.478	490.731	486.518	499.992	468.127	493.794		75.8998	761.169	806.778	783.486	778.608	783.597	804.932	792.89	769.538	831.808	838.584	886.291	808.146		76.8501	802.297	828.506	851.32	834.568	828.746	849.643	936.612	826.852	782.575
77.5429	827.711	822.205	834.224	833.067	996.348		72.0116	470.983	483.021	473.3	492.208	487.5	501.888	466.993	495.104		76.9228	763.158	808.213	781.778	779.082	782.744	804.381	790.426	768.43	831.52	838.21	887.002	807.28		77.8741	800.132	827.837	852.49	831.441	831.099	848.524	940.715	829.61	783.799
78.567	827.107	821.675	833.154	833.381	998.76		73.0116	472.215	485.895	472.934	493.947	489.477	503.794	467.914	494.575		77.9458	762.783	807.608	779.025	778.941	782.147	805.613	792.061	766.308	828.027	837.614	888.977	807.089		78.8971	800.178	828.463	852.537	833.28	830.358	845.798	938.4	828.503	782.134
79.5909	829.273	821.589	832.782	833.671	1001.63		74.0116	471.849	484.507	478.23	493.904	488.923	503.196	468.212	494.751		78.9689	766.221	809.813	782.632	781.574	782.088	809.417	794.463	769.733	832.628	838.982	892.324	807.334		79.9211	799.346	829.758	856.206	833.278	828.517	847.698	939.886	830.877	780.703
80.6149	826.527	819.424	831.801	834.838	1002.81		75.0116	473.44	484.998	480.229	494.892	492.779	504.815	470.07	495.643		79.9918	764.762	810.806	782.975	780.608	785.436	807.126	795.334	769.887	829.839	839.448	891.066	809.202		80.9481	803.492	832.142	857.489	834.381	834.3	849.12	944.209	831.201	783.886
81.6389	829.541	822.505	833.272	835.911	1006.74		76.0116	473.869	485.411	485.152	495.458	493.454	504.659	473.537	498.456		81.0148	765.339	813.566	784.161	781.253	785.036	808.311	794.232	769.561	831.329	841.711	895.908	810.781		81.9741	801.428	829.93	859.882	835.053	834.547	848.796	940.92	829.834	783.381
82.663	830.408	822.5	831.361	837.375	1008.99		77.0116	473.316	486.28	490.28	496.751	493.758	506.645	471.502	499.378		82.0378	764.403	811.643	784.963	780.622	784.213	808.723	791.956	767.68	830.8	839.063	892.51	808.871		83.0011	801.754	829.905	858.214	834.496	835.137	852.398	940.886	829.451	780.785
83.686	831.569	821.547	833.412	835.322	1010.82		78.0116	472.244	484.836	484.915	499.616	493.385	506.512	472.035	497.883		83.0618	763.7	810.737	782.354	779.493	781.763	803.995	790.278	768.144	830.422	839.791	891.259	807.158		84.0351	804.689	831.941	862.126	837.393	839.21	859.261	944.208	830.679	784.991
84.7099	832.724	822.758	830.903	836.683	1015.66		79.0116	473.249	487.375	481.819	499.07	495.722	507.565	475.089	500.406		84.0848	764.897	811.77	785.103	783.956	784.165	806.102	794.399	769.686	833.071	843.001	897.086	809.664		85.0611	803.317	832.31	861.693	838.671	836.744	860.188	940.273	828.877	782.744
85.7349	835.708	821.242	831.388	836.841	1015.23		80.0116	472.669	484.781	480.38	501.691	495.849	507.954	472.738	498.951		85.1029	766.849	812.496	782.491	779.098	784.425	804.734	793.307	770.293	830.625	841.019	895.934	809.406		86.0851	800.863	833.002	860.76	836.686	838.238	864.156	939.283	828.693	780.355
86.7589	835.169	822.693	833.653	839.925	1021.3		81.0116	472.723	486.546	481.5	501.946	499.814	508.703	475.799	499.774		86.1219	765.766	813.694	784.379	781.764	784.968	807.837	794.724	769.596	832.236	844.394	897.679	810.718		87.1091	806.734	835.463	859.364	841.08	843.831	872.868	944.081	832.871	784.717
87.7789	833.64	822.093	830.588	840.057	1021.78		82.0116	473.933	487.773	483.149	504.007	503.095	509.382	477.06	501.667		87.1399	766.028	813.504	784.241	781.107	784.792	808.832	794.175	769.095	830.59	844.865	897.184	812.657		88.1321	806.696	837.838	859.056	841.826	843.551	876.162	947.683	832.79	783.073
88.8059	834.503	821.752	832.178	840.586	1023.47		83.0116	474.794	489.625	482.89	503.506	502.741	510.129	476.298	500.801		88.1638	765.75	814.286	784.303	780.168	781.907	805.325	792.263	766.303	829.493	843.93	896.144	806.518		89.1561	804.625	835.658	853.181	838.444	841.998	873.936	942.642	827.351	782.39
89.83	837.253	822.412	829.042	843.505	1027.45		84.0116	473.337	489.335	485.256	505.4	506.436	511.962	477.221	502.813		89.1868	765.315	812.263	785.038	782.968	784.734	807.744	791.225	767.754	829.596	845.459	897.749	809.786		90.1832	806.116	836.989	852.958	839.461	845.531	872.355	944.362	828.646	781.919
90.8549	837.911	826.191	835.342	846.013	1032.21		85.0116	475.693	491.196	488.019	507.883	507.038	512.865	477.842	503.869		90.2048	766.883	815.8	785.901	782.402	783.79	806.653	793.575	767.098	832.975	845.131	898.395	812.283		91.2071	810.275	841.171	853.789	840.644	849.463	869.578	947.764	831.746	783.997
91.878	838.215	822.646	832.294	845.724	1032.27		86.0116	477.021	493.088	485.551	512.794	511.419	515.694	480.442	505.737		91.2229	767.208	814.896	784.733	781.895	783.434	806.798	792.312	770.539	832.229	846.482	899.337	810.484		92.2311	809.422	842.632	851.889	838.157	849.734	864.663	947.751	834.798	784.264
92.9009	838.337	824.992	836.198	847.754	1035.8		87.0116	476.999	492.189	485.669	511.614	513.077	516.136	481.245	502.084		92.2458	768.427	815.255	784.363	781.758	783.727	807.823	793.932	769.714	829.313	848.626	900.602	812.473		93.2561	808.958	840.783	851.964	836.717	848.105	859.141	947.246	831.688	784.385
93.9239	843.502	828.381	837.392	852.029	1042.83		88.0117	475.89	491.863	492.758	512.751	515.552	517.283	482.418	505.694		93.2688	769.034	818.069	783.531	784.382	783.253	810.192	794.377	769.348	830.919	848.192	902.643	812.832		94.2801	808.408	843.323	853.135	838.481	849.471	851.878	950.446	831.04	782.724
94.942	845.344	828.071	835.626	852.771	1042.48		89.0116	476.836	495.865	489.432	514.446	515.425	515.396	484.693	505.948		94.2918	766.058	815.152	785.109	781.541	784.89	807.144	793.46	767.464	832.122	846.618	901.552	810.446		95.3011	808.671	845.005	852.627	838.531	852.272	850.864	953.087	830.866	786.669
95.9649	841.949	825.382	834.019	849.561	1044.38		90.0116	478.463	496.276	501.489	518.354	517.042	519.043	488.073	506.249		95.3148	767.596	816.833	783.792	780.561	785.514	809.405	792.548	766.427	831.736	846.89	900.181	808.439		96.3251	810.695	845.562	856.114	841.666	857.019	850.012	957.513	830.753	786.477
96.9879	845.609	823.777	834.092	850.947	1044.84		91.0129	477.639	496.774	496.931	519.34	520.492	520.319	488.702	507.869		96.3378	768.647	814.784	785.233	783.824	786.275	808.154	791.822	768.453	834.313	849.177	900.059	810.26		97.3451	810.398	845.754	860.659	840.432	853.032	848.124	954.717	829.044	784.757
98.0059	849.951	824.627	834.765	853.177	1046.77		92.0116	478.829	498.123	499.327	520.219	521.941	522.022	489.832	508.544		97.3558	769.486	816.463	786.067	783.211	786.975	809.209	792.785	769.123	834.356	849.359	904.714	816.456		98.3701	813.103	845.244	864.102	840.63	858.614	850.754	958.63	831.476	788.612
99.0289	852.433	828.178	836.168	853.731	1054.54		93.0117	478.695	496.822	495.134	521.398	522.444	523.276	489.151	509.093		98.3738	767.731	814.056	785.236	784.259	785.46	807.724	792.306	768.032	832.71	846.248	903.618	813.234		99.3931	811.493	847.686	867.133	839.984	857.285	853.26	960.307	830.7	786.995
100.052	856.175	827.395	836.08	858.592	1054.97		94.0116	480.806	498.932	507.476	524.305	526.139	526.902	489.172	510.684		99.3968	771.052	819.989	786.866	785.104	788.222	808.748	795.026	771.788	834.564	851.022	903.273	815.004		100.416	811.616	851.186	869.73	840.394	861.15	858.616	959.693	835.434	787.366
101.075	853.884	827.245	834.886	856.014	1054.36		95.0116	481.111	502.083	501.286	526.022	526.944	525.534	492.699	511.024		100.42	770.039	819.354	784.048	783.444	785.373	809.049	794.554	769.334	832.546	850.564	905.487	816.172		101.439	811.883	849.02	869.475	839.978	859.876	863.011	960.745	833.392	784.839
102.098	854.456	833.324	837.917	857.353	1059.61		96.0117	481.842	501.492	506.401	528.007	528.822	527.942	493.124	511.486		101.443	771.652	819.71	786.915	784.948	786.192	810.408	796.006	770.253	835.554	852.175	905.125	814.185		102.462	814.649	853.259	868.205	840.61	863.427	871.665	964.324	835.029	788.324
103.116	855.48	828.474	837.017	859.474	1058.15		97.0116	480.819	502.461	502.464	530.288	529.828	529.429	491.581	511.508		102.466	771.92	819.165	785.946	784.671	786.935	811.714	792.916	771.104	834.428	852.961	904.453	815.587		103.485	814.097	850.147	865.873	838.727	862.931	876.822	962.11	834.138	786.07
104.139	858.167	830.307	837.206	861.69	1063.87		98.0116	484.489	504.693	496.846	535.407	532.128	529.94	496.588	516.406		103.489	771.562	819.145	786.345	785.5	784.713	811.126	794.744	770.851	835.78	852.381	904.947	814.441		104.508	817.669	855.822	866.994	845.379	866.057	884.156	965.686	837.832	785.762
105.162	859.731	829.297	833.993	861.458	1064.48		99.0066	484.151	504.716	495.519	535.541	535.465	532.561	497.789	516.029		104.512	772.593	818.663	783.435	783.67	786.836	807.892	792.861	771.321	835.409	853.087	907.001	815.997		105.53	814.798	853.873	860.078	843.048	866.385	879.887	966.229	834.057	785.525
106.18	861.445	832.313	836.839	865.886	1073.3		100.012	484.812	504.027	493.56	536.663	534.779	534.725	498.504	517.849		105.535	773.092	823.554	787.51	785.847	788.633	808.883	796.947	772.972	836.329	855.515	906.622	816.524		106.554	815.268	852.964	854.826	841.293	866.73	884.345	968.253	834.938	785.707
107.528	862.537	827.737	837.708	866.084	1074.31		101.007	486.928	506.964	493.453	536.07	536.664	536.178	500.669	516.074		106.558	771.547	820.965	786.309	785.958	786.448	811.235	795.365	771.551	836.436	853.856	904.151	818.848		107.577	818.869	855.093	853.836	843.386	871.637	880.04	971.245	836.317	786.406
108.702	859.255	828.449	836.251	866.078	1074.71		102.012	487.456	509.356	495.034	538.903	537.131	539.058	500.002	519.441		107.581	771.981	819.558	784.962	784.283	784.394	809.611	793.24	769.449	833.373	853.564	903.097	817.283		108.596	819.461	857.957	854.49	843.892	872.808	878.236	972.952	838.493	785.39
109.868	863.272	832.486	837.332	870.696	1079.04		103.012	489.022	510.207	496.11	539.819	540.998	540.998	502.297	519.802		108.604	775.181	826.736	789.039	788.292	789.264	814.232	796.954	773.412	838.34	859.476	907.408	819.331		109.62	815.613	855.704	850.631	840.661	869.835	870.523	969.687	832.443	781.214
111.038	863.721	832.812	840.27	872.829	1081.51		104.012	488.89	510.721	495.139	541.931	541.781	543.025	501.649	520.772		109.627	772.361	821.413	785.854	785.534	787.268	809.575	795.258	770.439	834.896	857.659	907.244	818.819		110.644	819.855	856.7	855.831	842.077	872.449	865.741	971.944	835.192	786.429
112.061	862.408	833.099	835.464	870.48	1081.7		105.012	490.653	512.022	496.892	541.344	541.731	543.756	501.625	520.484		110.649	774.319	822.355	786.102	786.929	784.574	810.992	794.919	772.642	835.878	857.37	906.957	818.89		111.668	820.786	857.505	857.327	843.117	876.093	862.159	973.611	837.39	784.388
113.084	868.588	835.596	842.349	875.33	1086.51		106.012	490.642	514.744	497.885	544.175	544.322	549.208	504.605	525.143		111.672	773.462	822.151	785.664	786.461	785.337	810.523	797.482	769.961	836.731	854.284	905.408	817.95		112.691	823.117	860.125	866.392	845.703	881.317	861.747	977.897	838.101	785.735
114.107	867.054	833.604	839.798	875.855	1086.11		107.012	490.991	512.514	496.995	541.993	544.588	548.048	503.401	525.705		112.695	774.824	824.378	787.533	788.056	788.845	813.144	796.808	771.828	837.314	859.535	906.255	821.283		113.714	821.093	856.7	864.628	843.459	877.73	857.312	978.466	833.592	784.931
115.13	871.238	836.504	839.542	877.641	1089.63		108.012	492.58	512.581	495.109	544.12	545.689	550.125	504.253	523.063		113.719	776.675	826.273	785.361	786.988	788.749	813.158	793.972	773.328	839.354	860.749	910.089	820.3		114.737	820.935	859.259	871.726	845.118	880.778	858.878	980.832	835.842	785.295
116.153	876.759	838.764	842.992	880.565	1095.13		109.012	493.252	515.128	497.185	544.924	545.237	552.968	506.215	526.059		114.742	776.357	824.952	787.371	787.73	787.298	811.327	796.408	770.558	837.669	859.111	908.334	818.367		115.76	823.846	860.114	876.91	846.6	878.237	863.857	983.761	839.192	785.878
117.176	873.283	835.38	839.029	879.822	1093.5		110.012	495.293	516.156	497.949	549.214	550.184	555.985	506.863	528.346		115.765	775.751	826.375	786.427	787.026	789.188	812.128	797.164	771.859	837.282	860.086	911.395	820.546		116.783	823.849	860.348	876.776	846.542	882.565	864.002	982.218	838.695	784.937
118.194	873.692	835.26	839.469	882.038	1093.31		111.012	494.941	517.991	498.027	550.398	550.03	556.595	507.636	529.974		116.787	775.352	823.983	785.491	787.751	785.412	812.841	796.247	770.849	836.244	858.592	908.526	818.563		117.806	822.348	858.916	874.772	843.019	880.666	865.588	982.031	834.446	782.342
119.217	874.015	838.019	840.018	885.249	1096.2		112.007	496.257	518.144	499.141	552.258	551.096	559.846	509.694	529.798		117.81	774.758	827.01	784.466	787.162	786.981	813.093	795.246	770.237	837.021	858.673	908.377	819.816		118.829	826.958	864.92	878.852	848.995	884.937	873.8	991.358	840.565	786.012
120.24	878.646	837.67	841.161	887.302	1098.33		113.012	499.64	519.326	496.907	552.859	551.286	560.388	508.773	531.177		118.833	774.467	826.598	783.699	786.155	786.91	813.02	795.839	769.538	835.091	858.217	906.759	820.226		120.344	825.714	864.276	871.416	845.495	883.747	876.488	991.36	838.996	786.49
121.263	881.873	841.996	843.354	890.442	1103.22		114.012	501.253	520.724	498.296	555.557	554.619	564.938	513.422	534.337		119.855	776.115	827.16	785.548	787.37	786.387	813.167	795.696	773.729	836.951	861.051	906.906	818.914		121.515	826.891	863.649	865.239	846.498	887.915	877.972	992.953	839.932	785.279
122.286	881.093	841.937	845.293	889.933	1101.65		115.012	501.619	521.247	500.228	557.577	556.059	566.307	511.469	535.246		120.868	777.961	829.956	787.765	790.633	789.883	816.712	799.198	774.988	838.958	863.346	910.998	824.283		122.686	826.837	863.234	864.417	844.779	886.267	881.057	995.097	839.066	784.823
123.309	887.083	843.574	844.871	894.597	1105.52		116.012	503.73	522.678	497.905	559.17	555.226	567.192	511.156	534.842		121.886	778.835	831.888	788.078	790.303	789.676	815.386	798.385	773.387	838.337	864.731	911.37	822.784		123.856	828.115	861.833	861.654	845.544	890.909	880.584	994.924	841.031	785.158
124.332	886.903	841.94	845.353	892.972	1108.7		117.012	504.876	524.456	499.47	558.641	558.497	568.646	512.632	537.804		122.9	776.364	830.744	787.417	789.824	788.033	814.897	798.034	772.541	838.327	864.401	909.731	821.832		125.027	829.512	862.286	860.185	844.903	888.703	881.339	998.509	837.269	782.202
125.356	888.578	844.256	846.778	896.741	1109.64		118.012	505.083	523.281	499.848	562.976	559.541	570.894	513.588	540.21		123.923	778.556	829.432	785.615	791.792	788.007	814.769	798.222	774.551	838.853	865.073	909.724	825.806		126.197	830.653	865.102	865.514	848.035	890.808	880.307	998.971	839.011	781.846
126.38	891.975	846.29	850.911	901.89	1113.75		119.012	508.107	526.364	502.103	566.747	560.119	574.763	514.466	538.881		124.946	776.912	828.879	783.759	789.197	786.995	814.483	796.904	767.49	835.627	860.768	907.673	820.406		127.367	830.705	863.509	862.588	845.29	890.655	876.835	1001.14	836.522	782.832
127.405	890.72	844.885	845.541	897.231	1112.05		120.012	508.975	526.517	501.798	570.042	561.909	577.219	514.568	542.099		125.969	780.853	832.876	785.438	792.06	787.844	815.721	799.279	770.448	836.768	864.959	909.622	825.023		128.539	832.966	863.163	867.246	846.585	894.245	877.15	1007.94	839.765	783.717
128.428	890.309	845.497	845.105	901.286	1114.66		121.012	510.69	529.871	503.191	572.09	563.359	578.448	514.852	544.171		126.992	780.858	832.96	787.642	794.49	787.391	816.954	801.151	773.309	837.767	865.74	912.739	824.046		129.706	832.386	861.968	866.06	843.278	893.232	877.483	1007.01	836.283	783.311
129.453	893.9	850.243	852.005	904.832	1119.42		122.012	513.65	530.759	503.184	574.548	565.666	581.568	516.317	546.819		128.015	779.625	835.073	785.442	791.601	787.074	815.861	800.756	774.599	836.614	866.278	912.367	824.554		130.877	831.77	862.29	867.124	845.181	894.704	877.712	1010.9	840.724	785.171
130.473	896.104	851.993	850.96	911.741	1125.36		123.012	515.039	531.08	503.426	578.225	564.542	584.809	518.717	547.378		129.038	780.306	833.112	784.959	792.367	786.996	816.524	798.216	772.642	838.155	867.069	907.202	825.184		131.901	836.019	867.697	869.163	846.955	897.873	880.927	1014.81	842.718	786.382
131.498	895.812	850.08	849.113	905.563	1120.01		124.012	515.801	530.829	502.405	576.853	566.212	587.003	518.557	548.469		130.061	781.839	835.032	785.142	793.726	789.15	816.471	799.259	775.141	840.168	866.365	909.874	823.798		132.919	837.097	864.229	867.697	846.414	895.683	878.483	1016.64	839.372	786.009
132.522	898.376	848.723	848.003	908.332	1122.69		125.012	518.418	533.3	502.681	583.518	568.269	590.392	519.822	551.598		131.084	782.546	836.464	785.659	795.181	787.398	817.878	801.315	773.62	840.816	868.266	914.977	823.849		133.942	833.936	862.984	867.66	845.412	894.088	877.276	1016	837.583	783.377
133.547	901.885	850.903	852.594	913.114	1130.78		126.012	520.619	535.917	505.276	592.583	569.616	594.473	521.286	554.373		132.107	781.907	832.733	783.549	794.642	787.52	816.019	800.585	771.995	839.764	868.194	909.753	823.566		134.965	837.556	864.473	866.513	845.852	895.253	878.3	1018.63	841.297	785.137
134.572	902.876	853.849	854.726	913.168	1130.92		127.012	524.024	536.236	508.011	591.815	572.662	596.141	523.112	556.947		133.13	782.269	834.472	784.734	792.463	786.335	816.931	801.852	771.75	840.669	866.761	911.09	827.067		135.988	837.833	862.577	866.75	845.097	895.543	878.856	1021.11	840.386	783.026
135.597	905.925	854.984	856.792	917.12	1132.58		128.012	524.04	538.298	504.257	591.742	568.75	597.927	521.137	556.5		134.153	783.649	833.534	785.473	794.827	785.741	816.696	802.062	771.31	839.112	867.737	910.864	825.474		137.011	840.89	867.547	871.208	849.078	900.763	883.466	1027.32	842.517	788.206
136.615	904.013	856.181	854.223	920.098	1132.98		129.012	526.588	539.449	506.534	596.054	569.578	601.659	521.164	559.998		135.176	783.649	834.217	785.007	794.531	787.341	818.429	804.107	773.91	842.287	869.05	911.35	828.805		138.029	843.327	866.18	869.194	849.625	900.691	884.4	1030.89	842.517	786.664
137.639	907.98	857.383	856.617	920.4	1137.27		130.012	532.357	541.796	507.364	598.801	574.67	607.786	524.984	565.261		136.199	784.255	834.344	785.386	795.103	787.328	818.815	804.578	774.181	842.276	867.412	913.878	827.554		139.052	846.38	868.555	873.059	850.781	903.534	889.649	1033.63	846.431	790.511
138.659	906.007	855.551	856.724	920.164	1136.52		131.012	533.605	544.05	506.995	598.917	574.032	607.893	525.313	567.432		137.222	782.239	834.051	783.156	794.269	784.796	817.475	802.283	771.476	840.833	866.736	909.392	825.181		140.07	842.411	866.797	869.12	848.985	901.684	888.469	1031.37	842.481	786.927
139.683	908.139	856.578	859.049	923.436	1138.56		132.012	536.176	545.167	505.749	604.177	576.224	612.924	524.561	568.522		138.24	781.753	837.256	785.879	795.787	786.596	819.391	802.722	772.249	841.433	868.894	910.503	825.828		141.093	845.059	867.394	871.003	850.301	903.379	891.404	1034.41	843.192	787.039
140.707	907.891	861.558	859.868	926.309	1144.67		133.007	537.575	547.665	506.933	603.315	576.1	616.029	527.356	574.416		139.265	781.064	834.837	783.581	793.473	784.385	816.478	804.228	771.836	839.835	869.789	907.473	823.943		142.112	848.249	866.507	870.876	849.457	904.577	892.893	1038.73	844.886	785.464
141.734	910.591	861.415	861.744	926.85	1145.57		134.012	539.291	548.904	506.395	607.663	576.276	617.336	527.104	574.72		140.288	784.258	833.959	783.89	797.026	785.537	820.374	804.593	771.297	842.02	871.325	908.995	828.188		143.125	847.511	868.246	873.29	849.056	904.304	896.134	1039.84	845.334	787.839
142.752	901.024	855.937	856.87	922.408	1141.88		135.012	542.329	551.407	506.908	610.117	577.985	622.464	528.77	576.44		141.313	783.918	835.102	785.694	797.537	786.13	818.811	805.606	773.147	844.472	869.838	907.094	826.361		144.148	847.547	866.242	871.515	850.849	898.849	891.396	1042.8	846.303	785.415
143.778	907.536	860.082	862.288	927.476	1151.42		136.012	546.499	552.296	506.075	612.683	579.305	626.517	527.735	581.386		142.337	783.266	833.692	783.751	795.121	784.592	817.337	804.585	769.925	840.641	869.33	903.466	824.649		145.171	847.182	867.789	870.11	850.228	900.628	894.371	1044.11	846.249	783.269
144.798	908.978	862.195	864.148	928.229	1150.83		137.012	549.071	555.004	508.012	612.107	578.783	627.381	529.076	583.338		143.361	787.148	838.283	786.127	801.659	787.381	821.848	806.918	772.98	847.171	870.842	912.147	827.5		146.194	851.5	865.898	875.146	851.001	903.309	896.288	1044.36	844.141	787.909
145.822	909.244	865.802	866.502	933.056	1152.65		138.012	551.273	556.541	508.151	611.243	579.158	631.77	530.187	586.497		144.385	786.975	836.014	784.837	798.671	787.205	822.395	805.436	770.95	844.111	870.339	905.485	827.328		147.219	855.212	868.036	878.55	854.396	904.594	900.771	1051.02	849.054	787.389
146.847	910.36	863.456	863.857	933.931	1151.32		139.012	552.256	559.073	509.082	613.353	579.971	634.954	529.669	588.754		145.409	786.558	832.778	784.986	798.073	785.857	820.007	805.798	771.156	842.294	869.986	903.828	827.731		148.245	850.648	867.058	878.664	851.442	903.853	899.558	1053.15	848.47	787.307
147.872	909.495	864.097	864.936	933.829	1149.95		140.012	557.431	560.053	510.021	615.225	583.454	639.688	531.958	595.101		146.428	785.934	834.272	783.673	795.161	785.753	820.293	808.277	769.151	844.7	870.396	905.737	827.241		149.27	855.15	873.047	880.581	855.536	906.924	901.683	1057.68	850.834	789.188
148.896	911.236	866.761	867.593	938.698	1156.99		141.012	560.571	563.191	508.554	616.924	582.252	641.483	530.55	596.797		147.448	786.139	837.767	788.359	799.505	787.153	822.317	809.664	773.64	848.807	872.404	908.416	829.558		150.289	855.701	872.766	882.1	855.123	906.579	902.875	1061.34	849.751	789.629
149.919	915.575	867.348	871.27	939.337	1157		142.012	562.77	563.733	507.212	618.15	581.926	642.387	530.401	599.758		148.468	787.83	833.521	783.619	796.897	783.793	821.256	808.789	771.324	845.622	871.02	906.151	827.709		151.312	851.796	868.474	878.876	850.803	900.587	900.799	1056.44	846.337	787.963
150.943	910.014	867.059	868.959	936.856	1152.7		143.012	564.927	564.979	510.388	619.686	583.724	649.632	532.164	600.541		149.493	789.324	835.065	782.665	799.679	786.115	820.214	808.238	770.552	845.813	870.942	906.154	827.195		152.338	854.998	869.371	883.904	852.541	903.053	902.758	1060.84	847.792	785.812
151.967	912.774	865.739	869.149	936.352	1153		144.012	569.954	568.401	512.302	623.307	585.94	653.076	534.995	606.175		150.513	788.594	835.673	784.081	797.396	784.805	821.578	808.894	769.463	845.063	872.418	903.669	827.701		153.363	857.445	870.172	883.023	854.163	905.077	906.592	1063.55	850.724	789.974
152.991	913.606	870.258	874.38	943.195	1154.23		145.012	570.48	568.432	514.258	618.683	584.64	655.215	532.842	607.577		151.539	788.434	833.656	782.164	799.92	784.018	820.446	808.954	769.093	846.463	871.468	902.121	827.276		154.389	857.92	865.638	880.46	852.819	900.666	905.519	1066.21	850.185	789.269
154.015	915.587	867.383	874.689	943.327	1157.81		146.012	572.744	570.524	512.914	619.771	585.563	660.764	534.68	608.72		152.565	788.439	833.574	784.261	796.214	783.558	821.994	809.446	768.601	844.456	870.479	900.28	827.714		155.413	859.663	871.606	886.808	857.833	906.175	911.38	1072.64	854.68	790.948
155.038	917.372	868.836	874.544	942.722	1154.78		147.012	576.733	571.453	510.767	619.815	587.465	659.813	535.825	612.833		153.589	791.238	835.946	784.294	799.658	784.315	823.884	812.388	770.836	847.875	873.207	904.753	830.018		156.44	861.092	867.168	880.95	852.83	902.114	908.479	1071.26	850.702	787.847
156.061	916.842	869.212	875.96	943.625	1154.64		148.012	578.28	575.124	511.504	621.334	587.891	664.358	533.848	613.595		154.614	793.765	836.542	784.181	802.4	786.82	822.963	813.69	771.76	846.917	873.297	906.328	829.866		157.464	861.689	870.609	885.813	856.968	905.525	910.625	1078.31	854.286	792.556
157.084	917.466	868.117	879.846	945.591	1156		149.012	580.039	574.013	511.281	620.059	585.78	667.947	535.047	616.066		155.638	790.147	835.998	781.944	798.485	785.019	823.721	812.083	769.503	844.754	870.62	902.754	826.032		158.488	861.991	873.517	884.827	857.039	903.281	912.333	1078.74	854.676	791.812
158.107	920.983	871.778	881.799	945.714	1160.35		150.012	583.259	577.662	510.86	623.022	589.895	669.107	534.815	618.253		156.663	789.92	833.589	781.973	799.013	783.084	823.827	811.433	768.871	843.464	871.609	901.786	825.824		159.509	865.95	874.149	884.832	857.069	902.39	914.107	1081.45	857.01	792.463
159.131	922.863	871.552	883.734	948.657	1158.51		151.012	586.012	575.653	513.551	623.601	588.499	673.159	536.102	621.568		157.688	791.423	837.626	783.097	800	783.1	824.469	815.134	772.213	848.127	872.484	904.19	830.21		160.533	861.978	870.388	884.646	858.795	902.665	912.336	1081.34	855.956	790.165
160.149	919.746	872.269	884.238	948.133	1157.21		152.012	587.792	579.776	513.202	626.169	591.835	675.441	538.211	623.75		158.713	793.227	838.034	784.479	802.086	784.5	823.725	816.91	770.093	847.478	870.392	906.781	829.558		161.551	863.225	869.876	885.283	857.845	902.55	916.96	1084.37	856.581	791.279
161.172	920.144	871.899	883.665	946.131	1160.27		153.012	589.423	580.068	513.322	629.52	590.347	679.569	538.222	623.865		159.739	794.644	837.819	785.039	802.049	786.294	825.799	818.273	772.129	848.236	872.849	904.05	829.717		162.576	864.769	869.812	885.411	858.269	903.11	915.59	1085.23	857.347	792.084
162.195	920.367	872.907	886.19	947.792	1160.62		154.012	591.161	581.699	513.547	627.744	590.432	680.558	537.293	627.635		160.763	792.292	836.653	781.783	801.178	783.106	823.046	817.897	769.951	847.281	870.793	905.721	827.918		163.599	865.922	872.721	888.005	860.971	904.835	919.806	1091.08	859.366	793.698
163.218	920.805	870.114	886.305	946.425	1156.49		155.012	595.385	583.653	514.337	625.629	590.592	685.814	537.905	627.65		161.787	794.034	836.944	782.72	802.956	785.638	826.776	817.128	772.993	849.723	874.598	910.289	830.391		164.617	866.696	872.934	886.047	858.283	904.656	920.166	1092.22	858.294	792.951
164.241	920.809	873.683	892.63	952.455	1156.89		156.012	596.405	585.458	512.778	627.866	591.809	687.185	538.767	629.623		162.807	792.906	840.278	785.896	801.85	786.595	824.447	818.109	772.066	850.144	873.754	908.103	830.863		165.642	862.372	870.024	887.538	856.317	901.369	916.999	1092.18	854.376	790.456
165.264	925.674	878.51	896.531	956.736	1163.4		157.012	596.965	586.076	512.951	628.775	592.449	689.008	538.89	631.305		163.825	793.169	834.937	783.512	802.063	784.263	825.379	817.601	770.256	850.394	870.653	906.015	826.768		166.666	867.362	873.827	886.876	860.541	903.945	922.626	1099.29	860.49	792.221
166.287	922.653	875.859	898.547	949.944	1159.8		158.012	598.575	586.255	511.599	630.168	591.349	691.2	537.914	632.833		164.846	793.518	836.113	781.313	802.659	784.185	824.025	819.243	768.779	849.806	872.934	907.049	830.294		167.69	866.7	870.9	889.432	860.733	905.118	920.154	1104.93	860	792.354
167.31	924.016	878.664	900.34	956.537	1164.19		159.012	603.039	586.779	514.299	627.01	594.495	693.298	541.751	635.883		165.866	797.307	838.596	784.889	802.413	783.396	825.154	821.362	770.018	850.529	872.909	903.9	831.398		168.715	870.223	871.658	890.39	862.269	904.661	919.305	1109.44	861.183	793.256
168.333	925.456	878.005	902.806	955.456	1164.13		160.012	603.012	587.929	513.754	627.096	593.5	696.069	540.604	635.167		166.891	793.604	834.591	781.987	800.761	782.69	823.616	818.864	768.35	849.844	872.378	902.784	828.358		169.739	866.333	871.337	889.451	861.164	902.917	920.633	1111.43	860.089	794.564
169.356	923.195	878.805	904.851	956.345	1160.7		161.007	604.703	589.384	513.99	627.486	594.227	698.599	541.506	639.178		167.916	794.466	835.351	783.012	799.881	784.919	825.415	819.381	769.002	848.324	868.717	901.679	828.29		170.763	866.149	871.479	891.236	859.889	901.476	921.524	1114.91	859.422	794.5
170.374	923.759	879.219	906.228	955.514	1160.62		162.012	605.521	589.734	515.634	627.891	594.944	699.836	539.256	638.275		168.941	796.357	838.301	785.358	804.608	786.578	826.771	824.569	772.466	854.056	872.724	907.732	831.993		171.786	868.259	872.953	895.422	862.615	904.887	926.085	1120.76	862.765	797.651
171.397	922.153	876.931	911.053	955.266	1161.84		163.497	609.221	592.962	517.249	636.262	595.37	702.034	540.685	640.49		169.964	796.218	838.815	784.729	801.693	784.504	828.028	823.881	770.845	852.048	871.965	903.122	830.395		172.806	872.041	874.973	896.547	864.317	905.971	926.117	1124.63	864.433	796.608
172.415	922.105	881.904	913.137	956.481	1164.45		164.496	608.132	593.185	517.146	633.38	594.166	702.566	541.167	642.195		170.987	796.531	834.356	781.952	803.947	784.212	826.934	822.857	768.57	851.837	871.002	900.976	827.228		173.832	868.12	871.981	894.065	861.6	901.846	924.215	1127.87	862.14	791.484
173.438	924.114	880.388	916.402	956.951	1164.76		165.494	609.96	591.389	517.513	630.361	593.46	702.8	539.754	641.917		172.01	799.385	838.067	785.473	803.71	785.349	827.532	825.056	770.781	852.107	873.537	904.641	830.919		174.857	868.832	872.019	895.31	862.441	900.288	923.142	1128.19	862.25	793.019
174.461	923.464	879.023	918.242	955.767	1162.23		166.493	610.859	595.174	518.625	635.666	597.28	707.991	543.401	644.746		173.029	794.3	834.983	784.478	802.391	783.073	824.356	823.16	768.332	853.662	871.415	903.437	826.698		175.88	867.786	871.612	893.443	863.36	901.927	924.063	1135.48	861.902	792.551
175.484	925.657	881.564	926.192	959.812	1167.6		167.491	610.949	595.082	519.131	635.422	594.49	707.029	541.944	647.3		174.052	796.225	836.172	783.89	803.749	782.803	824.429	825.377	768.512	851.181	872.337	901.904	831.483		176.905	868.477	870.263	894.462	862.724	902.103	926.099	1135.27	863.286	793.758
177.167	926.38	878.151	930.605	960.716	1168.59		168.348	613.647	595.588	522.841	632.954	595.259	710.865	543.27	645.901		175.077	795.734	833.061	779.764	800.859	781.893	823.743	824.897	767.055	849.364	870.439	901.179	826.951		177.93	870.073	871.129	897.433	863.702	904.14	928.552	1141.58	866.184	794.587
178.338	923.103	881.201	932.303	957.977	1166.23		169.348	612.829	596.355	522.92	632.05	596.108	710.114	543.337	645.939		176.101	799.505	836.428	782.48	803.526	782.153	826.293	825.387	770.17	852.927	873.357	903.882	832.032		178.954	868.455	871.854	894.217	863.28	902.737	924.785	1144.76	861.042	793.069
179.507	924.634	878.097	935.164	958.968	1162.62		170.348	614.598	597.485	523.4	633.696	598.631	714.899	543.606	648.257		177.124	797.611	835.515	782.943	801.066	785.836	825.802	829.676	769.83	850.952	871.261	903.165	829.59		179.977	873.207	873.091	897.486	865.296	904.076	929.168	1148.73	867.517	796.182
							171.348	615.541	598.008	522.259	628.031	597.215	713.395	543.599	648.256		178.146	796.268	836.333	781.087	801.964	782.192	824.028	825.9	768.51	851.405	869.493	901.269	829.028
							172.348	616.988	598.45	524.644	631.171	597.695	716.745	544.219	648.317		179.169	798.674	835.168	782.389	800.604	782.369	827.345	826.482	767.821	854.376	871.176	899.215	827.576
							173.348	618.19	598.818	523.761	631.973	598.296	717.52	544.073	652.391		180.192	798.08	835.76	782.521	800.558	783.412	825.051	826.329	765.632	851.15	870.828	901.988	828.421
							174.348	618.263	599.057	523.28	630.789	599.04	717.987	542.388	649.6
							175.348	617.633	600.18	522.393	636.112	597.348	720.153	543.893	651.682
							176.348	619.636	600.425	522.643	636.946	599.276	718.102	545.72	650.18
							177.348	623.107	603.722	522.453	637.924	601.836	722.533	546.135	652.609
							178.348	622.669	600.372	522.286	635.664	601.975	723.126	546.099	653.1
							179.348	621.444	601.535	521.893	633.472	600.187	723.334	545.418	652.83
							180.458	623.246	603.103	522.108	632.377	599.873	724.254	545.381	655.837
							182.337	623.143	602.914	521.179	631.67	600.971	725.752	548.286	654.066
							183.337	624.994	603.524	521.684	631.992	601.16	724.927	547.212	655.28
							184.337	624.636	603.674	521.355	630.388	598.84	724.273	544.727	654.919
							185.337	626.988	603.851	523.301	631.438	600.897	725.54	545.916	656.537
							186.338	627.942	605.45	524.085	632.147	601.147	728.384	548.452	659.554

## Sheet: 1 uM ATP (fura2)
Rel. Time (s)	Mean of ROI Object 1 (Fura 2)	Mean of ROI Object 2 (Fura 2)	Mean of ROI Object 3 (Fura 2)	Mean of ROI Object 4 (Fura 2)	Mean of ROI Object 5 (Fura 2)	Mean of ROI Object 6 (Fura 2)	Mean of ROI Object 7 (Fura 2)		Rel. Time (s)	Mean of ROI Object 1 (Fura 2)	Mean of ROI Object 2 (Fura 2)	Mean of ROI Object 3 (Fura 2)	Mean of ROI Object 4 (Fura 2)	Mean of ROI Object 5 (Fura 2)	Mean of ROI Object 6 (Fura 2)	Mean of ROI Object 7 (Fura 2)	Mean of ROI Object 8 (Fura 2)		Rel. Time (s)	Mean of ROI Object 1 (Fura 2)	Mean of ROI Object 2 (Fura 2)	Mean of ROI Object 3 (Fura 2)	Mean of ROI Object 4 (Fura 2)	Mean of ROI Object 5 (Fura 2)	Mean of ROI Object 6 (Fura 2)		Rel. Time (s)	Mean of ROI Object 1 (Fura 2)	Mean of ROI Object 2 (Fura 2)	Mean of ROI Object 3 (Fura 2)	Mean of ROI Object 4 (Fura 2)	Mean of ROI Object 5 (Fura 2)	Mean of ROI Object 6 (Fura 2)	Mean of ROI Object 7 (Fura 2)	Mean of ROI Object 8 (Fura 2)	Mean of ROI Object 9 (Fura 2)		Rel. Time (s)	Mean of ROI Object 1 (Luc)	Mean of ROI Object 2 (Luc)	Mean of ROI Object 3 (Luc)	Mean of ROI Object 5 (Luc)	Mean of ROI Object 7 (Luc)	Mean of ROI Object 8 (Luc)	Mean of ROI Object 9 (Luc)	Mean of ROI Object 10 (Luc)
0	961.197	938.78	1035.16	1115.13	914.019	968.663	980.601		0	890.582	910.61	799.686	942.496	898.119	918.393	828.035	985.186		0	915.202	859.959	872.199	882.525	1042.89	871.748		0	934.319	846.279	929.642	887.443	987.569	1084.73	1008.58	915.725	1063.03		0	1100.41	1154.19	1063.95	1125.22	1109.76	1160.72	999.903	1046.58
1.17277	960.856	940.379	1033.6	1112.75	912.897	968.808	977.887		1.17334	885.646	907.948	795.96	937.849	893.516	913.802	825.515	980.161		1.17406	911.852	858.224	869.067	879.225	1041.81	870.668		1.17455	933.33	844.827	928.681	886.195	983.547	1081.35	1005.82	912.135	1059.26		1.87592	1099.29	1153.16	1063.28	1123.58	1109.56	1158.42	1000.29	1044.41
2.3424	957.041	939.784	1027.85	1115.53	913.032	962.631	975.146		2.34543	886.195	905.025	794.809	936.684	890.759	912.965	824.09	974.92		2.34487	914.162	861.208	872.315	882	1044.27	872.562		2.34448	934.246	846.325	934.369	888.638	983.515	1084.79	1007.96	913.171	1060.96		2.87623	1101.27	1157.64	1066.65	1124.97	1107.64	1160.91	1003.49	1048.54
3.51219	955.195	938.811	1022.29	1113.7	912.361	955.012	974.829		3.51667	886.731	907.962	800.045	938.143	894.198	913.422	825.549	977.997		3.51227	913.859	860.227	871.683	879.849	1044.61	872.566		3.51484	932.222	843.463	930.694	884.595	983.412	1084.67	1007.88	912.903	1056.12		3.87584	1100.61	1158.77	1066.04	1126.22	1110.61	1163.86	1000.85	1047.08
4.68311	944.145	933.705	1004.62	1110.86	909.36	923.477	971.872		4.68703	887.311	907.947	797.808	941.247	894.056	914.196	825.105	981.599		4.67833	910.21	855.619	866.722	876.97	1040.82	868.183		4.67661	931.532	843.272	931.541	886.497	983.732	1084.47	1008.88	915.867	1057		4.87585	1100.08	1156.81	1065.97	1124.67	1111.52	1163.68	1000.89	1046.45
5.85256	922.072	934.036	963.499	1108.11	907.48	864.97	967.772		5.85877	885.559	904.406	794.454	935.629	888.019	908.347	820.819	979.32		5.84918	914.634	860.038	869.393	880.364	1043.28	870.289		5.84255	925.059	841.257	927.505	881.176	976.26	1077.45	1003.5	909.764	1050.78		5.87582	1099.94	1156.74	1067.48	1126.6	1114.2	1164.15	1003.7	1047.21
7.02242	845.379	926.452	860.781	1104.34	901.55	833.423	963.53		7.03073	890.071	908.385	796.968	939.543	890.341	911.978	823.137	978.569		7.02103	908.412	856.336	867.214	877.888	1040.34	867.93		7.0137	927.292	840.571	931.089	883.188	976.688	1079.4	1005.08	912.891	1055.61		6.87587	1099.33	1156.02	1064.07	1124.77	1109.71	1159.93	999.531	1044.41
8.19277	830.351	923.585	847.189	1101.11	894.777	826.641	954.785		8.19613	885.402	902.395	794.801	936.842	888.275	905.584	822.862	974.302		8.19312	908.798	855.068	865.007	873.097	1035.32	865.312		8.18448	925.678	841.126	930.454	884.139	974.496	1077.7	1004.74	912.959	1051.92		7.87581	1098.28	1155.72	1064.23	1125.63	1113.33	1164.68	1002.83	1046.74
9.3625	824.645	910.332	843.301	1099.23	875.283	823.192	932.891		9.36661	884.469	904.428	794.029	937.618	887.061	908.376	820.073	974.14		9.36397	906.383	852.415	863.728	874.7	1037.53	865.283		9.35525	920.049	838.26	926.714	880.11	969.625	1076.98	1002.7	907.039	1046.42		8.87583	1099.36	1158.25	1067.43	1127.44	1115.33	1166.11	1004.75	1049.3
10.5328	826.09	889.317	847.72	1098.96	849.29	825.197	893.834		10.5371	884.817	902.591	793.161	934.165	887.751	904.656	818.335	974.422		10.531	904.666	853.918	863.289	872.612	1036.04	864.677		10.5266	921.035	838.84	929.432	880.393	970.146	1077.38	1003.35	907.614	1047.87		9.87583	1101.3	1158.95	1067.45	1127.59	1113.8	1165.17	1005.55	1050.06
11.7038	826.718	840.705	852.185	1095.96	839.768	829.577	855.754		11.7067	883.883	900.481	793.426	935.523	887.571	902.35	819.632	973.096		11.701	908.175	851.164	862.919	871.684	1033.27	863.396		11.6928	916.554	835.695	929.155	880.538	967.344	1072.99	1000.13	907.496	1044.76		10.8742	1105.04	1161.36	1072.29	1132.59	1118.34	1169.78	1005.5	1052.85
12.8664	831.246	831.255	855.286	1088.32	831.967	830.825	838.347		12.8784	883.466	899.286	790.756	933.679	885.975	903.045	817.416	970.839		12.8724	908.859	853.371	864.948	873.208	1039.13	864.8		12.8602	916.186	837.239	929.714	876.904	968.198	1078.92	1003.05	908.701	1044.03		11.8758	1103.43	1161.21	1067.82	1131.54	1115.83	1167.85	1006.39	1051.74
14.0364	834.96	827.878	861.714	1079.06	833.924	839.61	833.883		14.0439	884.104	902.956	794.533	938.68	886.876	904.202	818.963	975.64		14.0427	906.805	851.322	863.317	873.202	1033.73	863.091		14.0315	914.254	832.746	927.215	876.371	965.254	1071.59	1000.05	906.697	1041.75		12.8758	1103.08	1157.93	1067.78	1132.82	1117.42	1164.66	1005.77	1051.32
15.2065	835.175	823.315	866.042	1055.27	831.487	841.219	833.675		15.2153	881.586	902.406	793.714	935.696	885.422	902.809	819.173	974.147		15.2139	904.261	849.381	860.199	868.238	1031.98	861.315		15.2012	913.138	834.204	926.496	878.023	966.239	1071.7	1001.63	908.829	1040.44		13.8744	1103.49	1159.56	1071.18	1133.53	1118.15	1158.43	1011.53	1050.88
16.3766	841.501	826.839	873.87	1004.39	832.957	846.754	835.181		16.3858	880.734	897.106	793.695	931.463	882.164	898.627	815.359	970.185		16.3844	908.493	852.269	863.646	870.094	1034.59	864.535		16.3718	907.159	829.873	923.388	873.018	960.972	1069.45	993.783	907.011	1033.55		14.8758	1106.33	1156.11	1069.77	1132.9	1116.15	1154.38	1008.56	1053.68
17.5476	845.999	824.242	879.465	942.734	834.373	854.433	840.229		17.5558	879.063	899.362	796.927	931.893	883.351	899.053	818.685	974.35		17.5549	954.46	888.853	932.451	916.842	1086.44	923.107		17.5415	920.95	844.622	940.766	889.975	979.256	1085.59	1015.7	924.676	1057.49		15.8758	1106.76	1160.51	1071.25	1139.37	1120.28	1132.56	1012.8	1055.42
18.7185	852.36	827.693	885.066	905.354	838.764	860.07	847.047		18.7268	881.262	900.558	798.886	933.697	884.105	900.82	819.805	974.661		18.7255	950.118	884.521	911.25	913.92	1080.41	918.63		18.7114	920.293	846.181	941.415	891.49	977.979	1089.5	1015.54	922.748	1055.82		16.8758	1106.31	1156.36	1069.32	1138.84	1121.41	1054.05	1014.69	1056.98
19.8893	852.033	827.205	889.839	889.074	835.509	861.95	849.629		19.8979	877.88	902.067	795.016	933.1	883.382	898.434	818.056	971.853		19.8959	945.979	883.975	901.468	880.075	1080.22	899.322		19.8815	917.646	843.479	935.788	888.183	974.939	1084	1014.73	920.544	1051.04		17.8758	1102.87	1140.73	1068.32	1134.33	1118.65	1032.89	1009.57	1053.29
21.06	854.199	828.619	895.229	884.428	842.541	866.278	856.594		21.0681	880.062	899.327	793.958	934.892	883.394	895.486	817.57	973.789		21.067	940.827	843.738	898.525	833.724	1052.52	835.519		21.0521	914.575	841.559	934.832	887.758	974.583	1081.98	1011.37	917.604	1049.01		18.8758	1104.78	1127.78	1071.37	1140.3	1123.52	1031.56	1015.1	1058.9
22.2307	853.806	826.339	895.425	879.94	842.69	864.057	860.354		22.2391	879.799	902.508	795.305	936.81	883.889	896.844	818.65	971.107		22.2369	935.982	763.542	876.032	824.933	874.077	828.748		22.2173	913.829	838.222	934.453	886.232	971.588	1081.59	1011.17	916.647	1046.39		19.8758	1089.17	1077.44	1068.76	1139.57	1122.11	1023.75	1010.74	1055.24
23.401	853.047	829.6	894.492	881.573	847.078	862.896	866.976		23.4095	877.703	896.639	791.593	930.724	882.119	892.581	815.303	968.506		23.4075	905.207	758.731	815.75	820.997	864.663	825.325		23.3886	916.083	840.895	934.608	883.062	972.427	1081.8	1006.87	904.538	1041.31		20.8758	1074.54	988.943	1060.73	1136.75	1120.2	1024.49	1007.61	1054.56
24.5705	852.849	832.618	891.481	889.691	852.46	856.413	876.311		24.5796	876.934	896.532	787.864	929.798	881.445	892.718	815.476	969.259		24.5776	825.737	757.646	809.117	820.912	868.963	823.118		24.5595	914.348	839.726	932.934	882.171	966.428	1078.81	1002.61	828.259	1020.25		21.8758	1037.46	974.839	1048.98	1133.09	1120.46	1027.32	1006.61	1054.68
25.74	844.818	833.597	879.91	887.413	851.849	848.654	878.337		25.7495	878.683	899.361	788.687	931.978	882.357	893.419	816.531	970.218		25.748	813.964	759.117	810.202	819.891	867.785	822.666		25.7308	914.033	836.743	932.053	881.503	964.452	1078.28	986.024	818.517	907.689		22.8758	961.02	973.961	1004.98	1134.03	1120.17	1032.19	1001.06	1055.48
26.9097	837.701	833.635	870.693	894.897	853.61	837.623	882.28		26.9206	880.453	901.404	789.951	933.893	883.622	893.881	817.619	973.226		26.9194	814.832	760.43	807.374	822.081	875.105	825.171		26.9011	913.246	839.134	927.488	882.357	960.774	1077.08	853.877	816.007	875.742		23.8758	940.397	982.068	979.797	1134.08	1116.79	1034.36	982.539	1050.34
28.082	833.261	834.618	862.683	899.658	852.372	832.347	881.709		28.0908	879.998	896.778	788.928	932.596	881.38	891.788	816.876	968.974		27.9448	821.071	762.928	806.127	825.03	882.73	824.761		28.0713	912.029	837.323	917.679	882.195	952.51	1074.95	844.141	815.693	869.637		24.8758	933.191	981.884	970.926	1125.87	1104.82	1036.07	967.988	1041.53
29.2528	828.293	830.117	854.714	903.802	847.865	826.739	879.429		29.2617	880.276	897.071	788.649	932.349	881.607	892.369	815.351	970.84		28.9678	817.747	758.24	802.61	817.697	880.673	818.172		29.2431	910.212	836.739	853.744	878.754	929.206	1073.27	844.608	815.989	864.649		25.8758	936.303	987.772	971.657	1111.12	1087.44	1037.3	961.139	1020.87
30.4239	827.293	830.871	851.55	908.803	843.092	826.281	869.192		30.432	879.507	895.559	792.057	934.039	882.034	890.849	814.748	971.253		29.9898	824.584	765.082	806.309	821.096	889.321	821.886		30.4148	909.558	835.381	804.397	877.49	851.451	1072.88	847.883	818.836	865.307		26.8758	939.67	1001.9	974.589	1083.26	1030.96	1041.32	966.076	1005.99
31.5942	826.172	830.851	849.538	912.558	840.141	824.48	858.698		31.4539	878.798	894.169	791.252	931.281	877.554	890.84	814.035	971.542		31.0128	826.113	763.244	800.804	819.798	893.981	821.646		31.585	904.897	830.047	796.781	871.975	827.567	1065.89	852.092	819.403	861.967		27.8758	942.77	1008.81	972.731	1055.07	1001.7	1041.86	963.042	996.811
32.6188	829.745	829.879	850.4	921.881	841.053	829.184	849.876		32.4719	877.672	893.927	788.33	931.479	881.307	891.581	813.505	967.376		32.0358	833.347	765.539	802.866	822.91	900.048	822.034		32.7555	906.095	828.697	798.28	876.029	831.859	1069.55	860.042	827.107	868.16		28.8758	952.185	1024.23	979.878	1051.14	996.819	1045.51	963.657	998.672
33.6418	831.955	831.441	859.654	928.12	841.266	834.751	847.108		33.4949	877.46	893.776	786.375	930.859	881.025	890.845	814.361	970.85		33.0548	838.623	766.251	804.092	819.639	903.756	824.474		33.9252	897.831	820.124	796.9	871.678	828.862	1060.54	867.598	829.389	871.551		29.8758	959.293	1035.47	978.501	1044.33	995.208	1045.06	963.824	996.959
34.6588	834.465	826.541	856.429	930.593	838.014	836.604	842.477		34.5179	878.341	894.629	790.061	932.103	880.417	892.527	812.821	969.643		34.0778	841.024	768.062	804.185	822.635	904.581	826.301		35.0953	887.035	801.149	799.768	871.068	832.683	1060.3	877.806	831.585	878.463		30.8758	972.778	1054.24	983.92	1043.91	1000.19	1047.24	968.704	997.798
35.6818	834.337	828.212	864.134	936.49	841.249	839.929	842.076		35.5409	879.275	895.656	789.308	931.73	881.743	890.289	813.315	970.962		35.0959	839.508	765.71	802.017	818.646	897.986	823.215		36.2658	836.795	789.537	799.397	870.188	839.621	1059.83	885.38	833.632	886.621		31.8758	977.005	1072.42	984.475	1036.58	1002.2	1047.46	969.818	999.094
36.7048	840.695	827.066	869.151	941.627	841.872	848.621	842.703		36.5639	877.099	896.256	790.631	936.774	882.975	891.949	815.168	971.251		36.1189	840.066	766.059	797.983	818.552	894.337	824.524		37.4366	795.736	782.927	801.133	864.955	842.726	1048.42	887.216	827.914	891.433		32.8759	989.681	1090.97	990.134	1032.53	1005.05	1046.96	974.355	1002.15
37.7278	846.131	829.074	876.622	944.619	842.849	856.594	845.902		37.5869	877.025	894.717	790.324	934.107	882.808	890.1	814.547	973.804		37.1418	836.77	765.29	796.826	818.604	888.923	823.558		38.608	790.375	782.483	804.653	863.596	851.32	1039.59	886.286	823.937	899.199		33.8758	999.554	1095.49	992.742	1033.02	1009.43	1041.94	980.2	1007.09
38.7508	850.578	829.325	882.557	944.789	848.148	865.49	848.608		38.605	879.921	894.583	788.345	935.362	882.665	893.067	816.029	971.308		38.1649	832.692	761.74	798.644	815.074	883.345	823.306		39.7784	787.387	779.884	808.284	857.121	853.947	1020.47	876.12	819.032	904.318		34.8758	1003.1	1091.78	994.772	1034.56	1015.01	1040.33	984.064	1010.2
39.7738	851.76	825.801	884.368	945.34	847.805	870.624	854.603		39.6279	875.892	891.725	787.781	932.276	878.076	889.036	812.323	966.968		39.1839	831.47	760.987	798.341	816.777	883.407	824.006		40.9457	789.369	782.212	809.802	842.351	861.131	982.407	868.425	814.233	906.005		35.8758	1004.06	1074	993.64	1033.47	1016.02	1036.4	983.195	1014.21
40.7968	851.863	825.468	888.226	945.333	845.537	872.841	858.76		40.6509	876.559	890.851	786.073	929.503	877.524	889.989	813.527	968.38		40.2068	831.494	761.734	799.465	818.286	888.358	825.331		42.1166	790.27	781.073	809.669	809.964	863.351	897.12	858.491	812.33	907.89		36.8758	992.935	1030.47	993.977	1042.3	1025.45	1034.32	986.994	1016.69
41.8148	855.248	825.881	890.815	944.606	850.854	879.526	862.656		41.6739	877.874	893.653	786.681	932.585	882.11	894.276	816.679	971.323		41.2199	830.254	760.825	797.457	819.428	890.402	825.866		43.2886	795.423	785.088	810.974	805.257	866.53	875.582	854.013	811.121	903.322		37.8758	981.888	997.154	991.332	1045.58	1029.43	1033.7	988.427	1021.36
42.8378	853.221	826.662	890.854	943.5	852.946	882.259	870.636		42.6969	881.02	894.501	789.535	934.433	881.808	891.062	817.303	973.518		42.2429	828.103	760.341	796.603	817.758	890.329	824.607		44.4586	799.751	784.219	810.192	804.021	865.846	869.385	850.483	812.324	902.182		38.8758	964.965	980.878	994.039	1045.82	1032.02	1031.02	989.773	1024.96
43.8568	849.055	825.119	882.982	937.51	851.238	877.724	872.72		43.72	878.505	892.761	789.697	932.644	879.003	889.751	813.087	970.131		43.2658	830.615	763.722	800.012	820.902	895.469	826.341		45.6287	809.276	786.537	810.032	804.89	864.37	873.77	854.968	818.022	895.967		39.8758	947.937	975.2	991.777	1051	1036.62	1034.96	988.654	1030.34
44.8798	842.103	824.215	871.719	933.357	853.322	871.137	875.022		44.7379	875.483	894.656	786.809	933.747	881.533	888.937	813.283	970.257		44.2908	835.895	764.684	800.174	821.028	901.225	828.479		46.8008	807.515	782.587	803.012	804.091	853.232	874.284	850.239	815.259	886.186		40.8758	933.937	973.605	986.902	1053.47	1039.57	1034.2	984.261	1031.23
45.9029	838.676	829.348	864.855	927.123	855.102	867.571	877.96		45.7609	877.433	895.922	789.714	936.458	883.066	891.108	814.291	971.33		45.3129	835.991	764.378	799.297	820.49	903.865	827.241		47.8255	811.547	782.805	800.6	804.693	845.459	881.169	855.04	819.123	877.335		41.8758	926.72	974.024	989.81	1057.7	1040.02	1035.02	983.849	1033.45
46.9268	833.801	827.266	860.552	924.866	853.28	854.331	876.946		46.784	875.809	891.516	786.53	932.311	881.602	890.897	813.727	968.137		46.3358	839.29	767.099	798.853	821.032	907.879	827.211		48.8485	814.066	786.221	800.083	811.458	842.781	893.714	865.754	823.392	875.029		42.8758	927.3	980.656	986.353	1059.84	1039.63	1036.85	973.81	1035.27
47.9498	829.731	827.49	854.449	920.737	853.09	845.644	873.806		47.8069	879.869	895.293	788.554	936.585	880.766	889.386	817.046	969.536		47.3578	841.608	769.127	801.572	821.444	910.051	826.638		49.8716	822.202	789.931	803.528	819.431	841.299	905.625	876.597	828.931	875.344		43.8758	930.152	985.178	984.3	1060.98	1039.08	1040.59	972.942	1038.23
48.9728	828.655	829.768	855.886	918.846	852.263	838.036	867.712		48.8299	876.964	894.768	784.988	933.394	878.638	889.028	812.891	969.629		48.3808	844.164	770.28	800.343	818.561	915.076	827.962		50.8946	824.751	788.069	800.685	819.28	840.654	915.099	881.517	830.959	871.115		44.8758	932.412	997.125	984.202	1055.1	1028.44	1040.98	968.458	1035.2
49.9958	828.845	828.95	856.941	918.206	851.337	834.229	860.571		49.8529	880.056	897.238	789.681	936.147	881.737	894.266	815.857	971.648		49.4038	851.429	772.091	801.717	820.692	920.683	827.465		51.9176	830.05	792.441	805.358	826.188	844.086	931.315	894.824	838.37	875.829		45.8758	937.668	1007.27	983.513	1053.4	1023.18	1039.93	969.144	1030.16
51.0188	831.229	832.824	858.164	917.703	849.092	831.361	856.485		50.8759	877.192	892.515	786.702	930.977	881.297	889.737	814.364	969.844		50.4279	844.51	770.942	798.195	816.873	916.786	823.998		52.9406	822.498	791.219	803.999	828.569	844.256	941.785	900.706	836.792	872.58		46.8758	945.669	1019.05	986.276	1048.51	1017.73	1041.27	971.21	1021.58
52.0419	833.954	830.619	863.863	915.084	845.111	831.323	849.126		51.8939	876.793	890.656	788.324	931.556	879.543	887.689	813.337	969.171		51.4508	848.045	771.84	801.927	818.377	922.553	827.663		53.9636	823.32	792.135	803.569	834.28	850.237	955.256	907.525	836.571	877.351		47.8758	959.247	1036.67	986.652	1047.38	1014.32	1044.21	970.446	1015.09
53.0648	837.124	830.661	866.999	917.22	845.754	833.287	845.874		52.917	871.954	888.798	786.049	932.072	877.428	887.812	811.115	968.183		52.4749	845.465	772.191	799.746	821.168	923.612	823.633		54.9825	816.375	790.819	804.89	837.454	850.849	964.593	913.381	833.171	881.263		48.8758	970.367	1054.87	987.5	1042.78	1011.22	1043.87	973.68	1009.68
54.0878	841.298	831.484	875.856	920.28	842.833	841.375	850.704		53.9399	878.977	893.383	789.199	934.354	884.19	891.766	815.321	973.056		53.4998	847.771	771.065	799.339	820.918	927.082	823.347		56.0066	818.205	792.827	806.786	840.764	857.709	977.971	916.286	828.834	885.37		49.8758	983.744	1069.46	985.684	1039.37	1012.54	1043.29	972.704	1007.17
55.1108	842.066	830.166	878.745	922.343	841.676	844.691	849.795		54.9639	876.622	888.948	787.339	932.311	881.742	890.06	812.707	972.168		54.5229	850.65	771.721	803.226	822.568	931.539	824.226		57.0295	813.229	788.904	804.505	842.714	858.697	987.012	916.021	823.377	892.658		50.8758	997.585	1084.99	990.301	1039.88	1013.15	1043.99	975.21	1006.92
56.1338	843.066	828.225	880.169	927.31	841.32	847.242	853.784		55.9889	877.603	888.929	787.194	930.902	882.527	889.435	814.988	970.821		55.5488	847.785	770.815	801.608	820.748	925.608	822.307		58.0526	812.373	790.762	807.842	846.322	863.776	997.985	914.991	822.947	902.503		51.8758	1008.22	1096.19	987.202	1037.95	1010.64	1041.42	978.291	1005.52
57.1568	845.715	824.357	883.648	928.841	843.763	855.111	855.079		57.0139	873.116	888.749	784.913	929.421	878.425	887.548	812.421	967.385		56.5738	849.903	771.315	800.514	824.286	928.208	822.354		59.0715	809.534	789.552	807.371	847.836	870.021	1008.07	910.427	820.385	909.48		52.8759	1013.15	1099.17	990.348	1035.87	1010.48	1041.03	980.28	1003.93
58.1798	853.073	828.71	884.631	934.761	847.404	864.377	858.946		58.0379	876.095	888.317	784.807	929.656	881.959	886.766	812.555	966.538		57.5979	846.547	771.568	800.069	824.998	927.836	822.585		60.0956	806.688	790.158	808.09	848.742	872.659	1012.23	897.162	817.968	913.261		53.8758	1017.77	1087.86	993.517	1037.56	1016	1041.79	984.078	1007.84
59.2028	849.864	828.602	881.949	936.09	848.995	871.844	861.891		59.0629	875.351	894.563	787.83	935.947	881.475	890.986	814.064	972.366		58.6239	844.147	771.026	799.047	827.327	928.904	824.096		61.1185	807.425	790.172	811.669	850.52	872.385	1018.01	877.405	820.52	921.586		54.8758	1022.41	1070.31	999.591	1045.37	1021	1046.61	990.647	1014.18
60.2258	851.612	830.853	880.456	940.882	847.574	877.74	861.824		60.0869	873.692	889.291	787.042	932.968	880.446	889.483	813.967	967.968		59.6478	844.342	771.187	802.488	827.136	926.505	825.163		62.1416	806.63	792.424	811.771	852.536	876.481	1019.31	864.052	820.29	927.297		55.8758	1009.87	1019.22	999.951	1045.41	1022.38	1044.01	990.572	1015.45
61.2478	843.642	824.909	872.211	940.517	847.568	881.484	859.093		61.1109	877.884	891.731	787.138	934.193	880.345	889.067	814.712	968.719		60.6679	844.168	774.069	802.828	827.952	924.129	827.009		63.1596	809.749	789.961	813.012	853.522	874.624	1023.73	851.345	822.05	927.621		56.8758	993.609	996.768	1000.23	1053.43	1027.29	1046.22	996.097	1020.04
62.2708	845.756	830.657	867.086	946.381	855.853	883.863	860.821		62.1359	877.251	891.391	787.463	934.337	880.042	888.395	813.545	969.334		61.6928	841.993	771.442	799.139	823.212	916.605	824.126		64.1775	814.646	793.262	815.094	855.615	878.461	1028.33	850.354	828.653	937.361		57.8758	966.677	987.246	998.9	1054.72	1031.06	1047.8	1000.72	1025.51
63.2938	838.914	826.787	863.244	951.726	855.036	882.798	862.655		63.1599	874.368	889.251	783.551	927.744	876.858	885.142	811.443	964.48		62.7129	843.692	770.784	799.868	824.246	913.286	822.87		65.2006	818.333	791.91	813.433	852.979	874.457	1030.85	852.146	829.334	937.071		58.8768	942.905	980.808	999.262	1056.64	1034.38	1044.23	996.402	1027.91
64.3168	835.486	829.185	859.916	953.175	856.972	875.327	864.524		64.1839	877.863	889.629	788.627	933.963	880.015	888.281	815.48	968.184		63.7339	845.845	770.636	799.558	825.007	913.696	824.717		66.2236	824.42	793.497	814.657	854.198	872.639	1036.77	854.201	833.943	936.914		59.8759	936.444	981.109	993.995	1058.24	1037.78	1047.16	996.648	1033.77
65.3398	828.372	829.076	854.348	955.253	859.118	864.789	860.269		65.209	878.809	892.382	787.427	934.939	879.751	888.354	814.273	971.914		64.7598	847.632	771.834	804.021	824.633	914.824	826.276		67.2465	827.516	792.186	816.071	856.658	869.168	1036.45	863.293	839.544	937.842		60.8758	929.953	989.942	998.527	1060.43	1044.6	1048.7	996.279	1042.62
66.3628	829.959	831.303	854.303	957.297	860.355	854.93	862.775		66.2329	875.065	893.332	786.32	930.585	879.548	890.286	815.161	969.84		65.7848	851.918	773.676	806.187	825.253	917.935	829.403		68.2696	832.194	793.547	812.985	853.932	864.371	1039	875.691	842.629	939.938		61.8758	929.425	993.99	995.178	1061.95	1042.55	1046.04	989.806	1042.83
67.3858	826.977	831.05	855.465	954.039	857.874	841.272	859.502		67.2559	876.695	892.342	785.312	931.103	879.154	888.463	815.989	969.486		66.8038	854.077	776.457	805.561	826.891	921.88	829.935		69.2915	835.619	793.837	811.987	857.697	860.076	1037.94	885.329	847.844	938.984		62.8758	927.57	1002.84	992.314	1062.37	1040.06	1047.63	985.708	1047.39
68.4088	828.962	828.913	859.009	956.303	860.219	835.714	857.497		68.2799	876.315	890.818	787.664	931.842	882.251	888.73	812.459	968.624		67.8278	850.364	773.908	803.937	823.076	925.17	828.222		70.3176	837.884	794.514	813.013	857.068	860.131	1042.46	901.095	848.203	937.178		63.8759	932.772	1014.15	994.978	1061.72	1038.15	1046.63	980.707	1052.44
69.4318	832.435	832.315	861.315	949.86	856.395	829.629	855.866		69.3039	875.595	890.463	786.368	932.305	885.324	889.663	812.295	968.343		68.8528	849.329	775.931	807.018	825.985	932.332	832.163		71.3436	841.934	796.155	810.972	858.583	857.152	1040.53	914.629	849.517	933.106		64.8758	941.734	1030.33	993.944	1064.12	1032.89	1050.15	979.445	1054.24
70.4548	838.464	833.206	869.705	953.9	853.505	833.41	859.668		70.3289	875.65	891.426	786.467	932.883	882.905	889.334	813.269	971.214		69.8719	852.765	775.699	809.106	827.409	942.69	833.784		72.3666	847.341	800.861	812.379	859.849	862.573	1046.89	930.378	849.172	933.026		65.8708	952.339	1047.13	997.093	1063.73	1025.23	1049.13	977.699	1055.11
71.4778	839.585	830.631	874.691	950.349	846.77	830	857.581		71.3539	876.608	892.575	786.311	932.908	883.456	889.409	815.671	969.648		70.8919	851.493	775.768	806.298	826.951	947.812	830.514		73.3926	848.283	794.974	812.135	854.753	859.788	1042.55	938.28	837.51	923.944		66.8758	964.641	1066.02	997.497	1058	1018.56	1047.14	976.042	1051.72
72.4958	843.393	828.578	878.207	951.755	843.443	837.231	858.483		72.3789	876.697	890.165	788.516	934.202	883.721	889.226	817.258	971.894		71.9158	850.334	776.344	806.488	826.729	955.619	833.76		74.4176	856.416	800.333	812.405	857.704	863.886	1045.35	950.836	833.807	921.962		67.8759	979.859	1092.5	1003.24	1055.62	1022.29	1050.79	976.246	1054.92
73.5198	847.025	828.327	882.167	948.972	838.139	838.584	853.419		73.403	875.811	893.215	787.072	934.775	885.549	888.674	814.259	970.015		72.9398	848.588	777.145	805.798	825.059	960.406	828.761		75.4426	860.436	799.531	814.738	859.021	867.608	1042.64	955.739	828.831	913.095		68.8759	1001.23	1113.92	1009.83	1058.74	1023.55	1053.95	983.238	1061.08
74.5428	851.758	831.005	884.703	952.229	839.861	847.653	856.256		74.427	874.141	887.434	786.101	930.515	883.903	887.471	812.869	969.741		73.9599	850.375	777.461	805.581	828.393	968.934	829.107		76.4676	862.355	798.685	811.627	858.435	869.463	1045.13	962.091	822.698	906.5		69.8709	1014.49	1120.3	1004.93	1052.13	1020.39	1049.64	979.853	1052.16
75.5668	856.136	827.446	884.626	952.546	838.562	858.856	854.971		75.4519	873.222	886.37	784.711	930.049	880.425	887.11	810.031	968.573		74.9848	847.785	774.168	801.132	826.785	968.564	826.046		77.4927	868.102	800.931	815.968	861.271	874.71	1046.34	963.503	825.084	901.09		70.8758	1030.87	1128.16	1008.72	1055.79	1018.88	1047.96	982.758	1054.9
76.5909	854.283	829.166	880.524	953.188	839.163	865.372	854.89		76.4749	872.766	886.306	786.371	928.816	881.399	883.822	810.018	968.051		76.0038	847.173	772.368	804.635	828.754	973.828	825.685		78.5175	870.069	798.212	814.034	855.586	873.299	1043.92	962.396	820.278	896.317		71.8759	1044.44	1130.32	1009.79	1054.97	1024.19	1048.98	985.752	1051.37
77.6148	852.964	827.131	873.226	953.631	836.592	877.285	855.024		77.499	872.502	888.628	786.527	930.049	882.066	885.564	813.053	966.313		77.0268	851.34	775.914	802.975	829.913	979.467	828.585		79.5535	873.969	800.755	818.154	857.693	878.613	1047.51	966.822	819.076	893.726		72.8758	1055.46	1119.1	1006.44	1055.69	1027.24	1048.87	989.141	1047.49
78.6348	848.922	829.6	868.459	954.441	839.945	884.848	858.9		78.5239	873.531	889.317	787.731	929.327	881.887	886.964	812.563	969.242		78.0509	849.236	774.964	805.181	827.649	983.85	828.159		80.5777	879.366	802.475	824.053	860.748	886.576	1048.02	969.22	827.609	897.408		73.8758	1053.63	1089.52	998.622	1056.08	1025.71	1047.57	990.042	1034.66
79.6538	842.375	824.755	855.683	954.758	841.294	885.128	853.532		79.5489	874.505	889.77	786.349	932.321	886.165	889.463	812.885	970.361		79.0758	845.636	772.761	804.173	828.391	985.699	826.529		81.6025	880.276	805.282	822.819	858.801	889.176	1046.47	964.466	830.335	893.096		74.8758	1060.9	1050.19	999.38	1059.67	1030.83	1048.64	997.609	1028.7
80.6778	838.063	825.992	852.943	958.52	845.466	888.291	857.971		80.568	875.189	892.091	788.291	932.58	884.706	887.2	814.172	969.372		80.0989	846.384	772.935	807.593	828.586	992.67	829.383		82.6265	880.261	804.241	824.441	856.981	889.008	1044.55	966.393	834.752	899.208		75.8758	1058.49	1012.3	997.916	1063.88	1035.16	1051.41	1001.82	1022.1
81.7028	835.307	828.558	847.812	957.249	846.758	884.851	859.812		81.5879	873.08	890.135	788.217	930.991	881.939	888.124	812.005	968.172		81.1229	844.293	774.863	807.198	826.09	995.94	829.486		83.6516	885.88	806.036	826.463	860.717	891.573	1049.2	971.816	844.11	906.034		76.8759	1042.41	997.012	993.365	1059.36	1034.34	1048.52	1003.07	1011.17
82.7278	826.144	827.536	844.356	953.798	851.013	879.266	858.266		82.611	874.678	889.535	787.293	931.987	881.803	888.121	814.163	967.877		82.148	841.366	773.683	806.351	828.254	994.208	829.372		84.6785	885.674	807.71	825.481	860.266	893.577	1049.25	968.071	848.886	907.786		77.8758	1017.43	992.149	999.508	1063.9	1037.22	1051.68	1006.57	1016.22
83.7518	826.785	833.623	850.029	958.028	857.714	871.225	861.652		83.6309	872.954	886.219	786.59	932.334	880.086	886.528	812.055	968.562		83.1669	842.598	776.218	808.071	826.467	996.954	832.636		85.7026	887.476	807.004	826.524	855.62	894.185	1045.52	963.037	849.849	915.137		78.8758	984.823	993.074	1002.73	1066.64	1038.04	1053.74	1008.83	1014.42
84.7758	822.977	831.568	849.417	953.629	859.91	857.939	860.468		84.6559	871.571	887.988	785.43	927.54	881.838	884.535	810.156	965.498		84.1898	845.167	777.337	810.924	828.49	999.194	835.567		86.7296	889.311	811.151	829.915	859.516	894.695	1046.55	965.251	858.383	925.585		79.8758	953.563	992.388	999.741	1063.28	1036.42	1050.17	1005.91	1011.33
85.7998	824.741	828.564	857.197	958.826	863.115	842.588	861.063		85.6789	875.842	889.366	788.551	932.883	882.89	888.203	813.608	965.965		85.2129	845.266	776.767	810.966	828.34	997.143	837.392		87.7535	891.714	813.453	834.424	860.5	896.333	1051.11	967.134	866.387	930.728		80.8758	940.992	1002.2	1001.28	1067	1039.25	1049.53	1005.41	1016.74
86.8248	829.838	831.366	864.524	960.395	868.662	835.798	862.307		86.7029	874.604	888.814	785.772	932.3	885.005	886.889	814.032	968.013		86.2358	845.632	776.651	807.881	828.924	997.1	836.376		88.7826	890.066	813.639	833.465	858.685	894.667	1047.12	960.251	863.621	937.575		81.8758	935.097	1010.03	1005.21	1068.88	1039.87	1049.43	1003.05	1020.07
87.8488	835.487	834.096	871.893	959.056	873.497	833.218	861.639		87.726	873.621	889.266	788.235	932.497	881.584	886.469	814.881	969.016		87.2549	844.013	776.822	809.227	830.208	999.345	837.07		89.8076	893.711	816.935	836.54	860.586	897.247	1049.29	963.044	869.592	945.133		82.8759	930.839	1022.87	1003.06	1070.8	1034.04	1051.24	996.038	1019.13
88.8668	841.876	829.494	879.861	956.515	872.781	828.849	862.629		88.7439	872.56	885.024	785.519	929.807	879.795	884.57	810.632	967.804		88.2778	847.873	777.811	806.63	830.868	995.544	832.579		90.8345	895.647	818.631	834.892	862.978	898.082	1049.28	960.277	868.425	951.297		83.8708	939.569	1042.01	1009.57	1076.34	1037.17	1051.6	990.554	1026.59
89.8918	850.578	834.676	891.886	960.444	879.341	833.767	863.405		89.7669	869.164	884.465	784.405	925.976	879.034	882.095	808.928	962.647		89.3009	849.568	780.837	807.931	832.448	997.031	834.429		91.8525	891.187	820.679	835.786	860.259	895.789	1050.46	957.988	870.11	954.162		84.8758	941.567	1055.61	1005.69	1072.05	1030.67	1048.6	982.977	1029.62
90.9148	853.773	829.874	895.368	958.571	878.015	835.267	860.988		90.7909	873.993	887.731	786.653	929.856	883.02	885.481	810.201	964.623		90.3239	851.571	781.216	808.38	832.232	999.671	832.366		92.8765	887.998	817.367	831.873	859.385	894.614	1047.52	954.604	867.005	957.308		85.8758	951.223	1077.59	1006.19	1070.89	1027.41	1050.85	979.417	1034.11
91.9338	859.686	831.455	894.105	958.176	878.385	838.499	856.911		91.8139	874.559	887.053	786.626	933.174	881.575	883.886	812.175	965.648		91.3468	848.93	776.736	808.057	829.223	995.538	827.094		93.9025	894.419	822.512	837.104	863.692	898.065	1050.78	954.813	866.647	965.36		86.8758	965.147	1100.05	1007.22	1070.63	1027.22	1052.26	975.714	1042.35
92.9588	860.272	828.827	888.816	958.053	878.91	846.204	855.896		92.8329	873.45	887.311	785.202	929.597	881.767	884.449	812.799	969.172		92.3708	845.919	777.18	804.353	828.594	990.794	824.734		94.9266	897.392	824.747	837.776	863.308	894.192	1055.01	954.736	862.97	969.822		87.8758	984.839	1117.56	1012.1	1067.77	1026.86	1051.68	975.751	1047.78
93.9828	862.04	828.064	886.168	960.585	879.279	854.391	854.856		93.856	871.893	883.724	784.157	929.052	878.717	882.995	811.756	967.192		93.3939	847.411	781.263	811.725	831.069	997.333	827.947		95.9515	894.424	823.367	838.632	862.753	891.886	1053.75	947.495	851.385	972.394		88.8758	1004.95	1122.37	1006.62	1066.11	1023.14	1047.78	972.571	1050.1
95.0068	861.484	828.933	874.99	962.479	874.334	861.61	852.645		94.8789	873.177	886.331	784.835	927.734	879.823	882.673	814.235	968.046		94.4178	845.002	778.488	809.128	830.775	990.837	826.898		96.9775	894.337	821.008	837.992	860.89	891.815	1053.23	936.886	840.659	972.957		89.8758	1029.05	1131.52	1006.88	1061.64	1024.4	1051.7	974.857	1054.58
96.0268	854.953	826.195	864.183	963.632	871.113	872.61	849.212		95.8959	871.578	886.79	787.114	928.813	878.185	883.278	811.51	964.804		95.4408	844.253	777.812	805.785	831.28	988.032	825.237		97.9976	894.404	822.127	840.227	860.888	889.548	1049.9	926.192	828.198	978.968		90.8758	1053.05	1138.63	1010.63	1063.91	1024.72	1051.4	977.493	1059.14
97.0508	847.361	825.183	856.528	962.262	857.947	877.543	851.446		96.9189	872.249	885.431	784.669	929.207	879.474	883.302	810.979	966.12		96.4588	842.83	778.28	810.134	831.919	989.249	825.753		99.0237	898.904	826.686	844.371	863.511	890.439	1055.05	904.4	822.721	980.091		91.8758	1067.82	1133.35	1006.09	1059.39	1022.05	1047.04	980.694	1059.6
98.0748	841.049	830.103	849.236	965.597	849.629	890.653	854.92		97.9419	874.954	887.325	786.1	929.975	879.258	886.078	812.818	967.443		97.4816	842.733	775.869	808.445	829.138	984.028	823.871		100.049	897.013	826.905	841.402	860.856	889.748	1052.23	874.307	820.812	980.842		92.8759	1085.77	1135.87	1012.97	1059.23	1030.05	1052.33	986.581	1068.3
99.0988	830.959	827.469	841.822	964.107	834.426	890.797	853.68		98.9599	870.306	883.663	782.814	926.476	876.692	882.114	808.914	960.306		98.5048	844.846	777.282	810.895	829.993	981.632	826.421		101.073	896.595	826.038	844.132	861.57	892.707	1051.81	855.47	822.505	982.446		93.8758	1084.52	1120.14	1008.35	1057.8	1026.47	1048	987.554	1065.89
100.124	829.411	831.629	847.511	965.384	830.442	892.298	856.089		99.9849	871.356	883.678	785.331	927.763	878.317	879.713	810.387	964.351		99.5269	840.531	775.522	813.683	829.588	983.796	830.256		102.096	897.2	824.998	843.43	861.483	897.917	1053.47	848.293	823.386	983.506		94.8758	1091.98	1110.42	1013.18	1064.05	1034.76	1052.93	993.831	1069.54
101.15	825.056	828.541	849.976	963.697	825.76	878.723	856.098		101.004	874.351	885.312	785.136	927.132	877.932	883.897	810.626	962.117		100.55	839.717	773.664	812.612	827.166	981.77	831.799		103.119	897.302	825.507	844.71	863.084	894.433	1050.29	848.778	828.939	984.107		95.8758	1087.86	1083.63	1008.65	1064.76	1035.74	1054.64	1000.19	1070.26
102.177	826.41	831.667	855.264	961.763	826.193	863.465	858.731		102.027	875.939	886.141	788.032	931.742	881.529	886.81	811.354	967.819		101.573	842.036	775.12	809.738	826.949	977.503	830.535		104.141	896.777	826.666	843.89	862.632	896.291	1054.04	850.839	838.297	985.053		96.8759	1081.19	1051	1012.38	1066.19	1040.15	1053.99	1003.5	1067.89
103.2	830.376	831.718	863.111	962.677	830.807	850.832	859.311		103.045	870.679	883.54	784.856	925.621	879.622	883.714	809.188	963.296		102.596	845.205	776.364	815.835	829.351	978.073	836.602		105.165	895.995	824.756	844.483	861.516	896.215	1050.55	860.48	850.178	985.247		97.8758	1063.59	1017.49	1010.24	1067.87	1042.72	1054.24	1006.66	1068.92
104.222	832.554	827.693	868.813	962.318	830.998	840.367	856.554		104.068	874.813	888.692	788.322	933.002	882.402	884.966	813.758	966.42		103.608	845.176	774.293	810.72	827.558	975.144	834.728		106.189	899.082	825.866	845.073	862.158	896.029	1051.36	871.131	858.585	988.228		98.8758	1035.51	1003.33	1011.08	1073.72	1046.64	1055.46	1011.06	1070.76
105.245	840.216	827.285	875.906	961.5	836.684	835.036	856.175		105.091	870.191	884.412	783.543	927.027	879.531	881.888	810.381	960.21		104.631	846.307	775.077	814.439	830.081	970.979	837.19		107.212	896.889	827.952	842.856	862.813	898.491	1050.89	884.926	867.846	986.897		99.8759	985.713	995.603	1003.28	1069.15	1044.36	1050.14	1008.19	1063.74
106.268	847.749	829.64	885.733	962.341	844.457	833.057	854.134		106.114	868.879	885.053	785.038	927.836	877.175	882.372	810.439	960.976		105.654	843.995	775.012	815.108	831.4	962.752	836.357		108.235	897.268	827.171	840.09	860.259	895.952	1050.69	899.581	871.425	988.382		100.876	963.439	1005.11	1013.63	1080.76	1055.32	1056.72	1019.88	1071.42
107.291	848.053	828.502	889.433	960.954	849.593	832.14	852.99		107.137	870.053	883.636	784.633	927.866	880.073	880.738	812.154	963.564		106.677	842.339	771.448	812.594	831.478	952.586	832.927		109.258	894.55	826.813	841.947	862.378	897.226	1049.37	913.849	876.377	988.455		101.876	947.463	1003.32	1009.18	1080.61	1051.73	1054.84	1016.95	1064.2
108.314	855.022	827.924	891.629	964.354	859.241	832.141	854.155		108.154	871.975	884.739	784.992	926.622	876.975	882.086	810.012	964.596		107.695	845.423	773.614	814.107	831.737	936.498	832.909		110.281	899.364	828.612	844.489	861.735	899.777	1053.24	928.417	883.673	989.78		102.876	944.73	1013.66	1012.96	1085.26	1051.26	1056.18	1018.63	1063.47
109.337	852.994	827.951	887.37	962.612	865.893	836.211	853.307		109.177	872.178	886.955	787.086	929.453	878.541	883.441	811.663	965.742		108.719	844.673	773.992	814.901	833.178	915.878	829.517		111.304	899.153	829.727	845.849	865.554	903.479	1054.31	942.553	889.93	994.796		103.876	943.088	1020.68	1009.54	1087.53	1040.21	1053	1013.72	1051.48
110.36	857.178	828.76	883.425	964.453	873.653	845.537	856.63		110.2	871.019	885.986	788.029	928.932	876.764	883.269	811.868	963.934		109.737	846.328	771.669	814.886	830.871	892.036	822.745		112.329	898.148	829.349	843.739	860.598	900.923	1051.08	947.527	888.214	988.721		104.876	947.137	1038.68	1011.37	1089.7	1036.76	1054.64	1017.13	1035.88
111.383	853.157	831.593	873.755	966.682	879.328	850.29	856.822		111.223	871.506	886.039	787.876	930.112	875.137	883.228	811.015	964.593		110.76	846.114	772.459	814.513	831.156	879.948	822.783		113.352	896.859	829.568	846.555	863.395	902.802	1052.53	954.688	886.379	987.99		105.876	952.759	1051.79	1010.07	1086.94	1029.68	1053.86	1016.1	1020.9
112.406	848.287	830.792	864.453	965.999	883.475	856.953	860.129		112.246	869.655	884.161	788.178	928.343	875.843	880.06	811.309	964.379		111.783	842.148	772.549	812.69	832.163	875.745	816.899		114.375	895.751	828.214	849.153	864.784	904.185	1051.88	958.127	886.396	987.018		106.876	964.298	1072.6	1013.61	1081.89	1024.04	1053.39	1011.19	1016.76
113.429	841.036	830.992	857.356	965.675	885.314	864.093	859.417		113.269	870.288	884.066	786.673	927.897	874.413	880.894	809.352	963.487		112.806	840.454	771.89	812.217	827.387	872.533	815.018		115.398	897.175	829.902	848.025	863.921	907.368	1052.35	963.971	884.38	987.449		107.876	977.193	1087.71	1012.93	1074.37	1018.83	1057.07	1004.3	1013.35
114.452	834.544	830.09	852.517	961.493	885.903	866.954	857.581		114.292	870.406	884.595	788.908	930.174	877.848	882.324	810.529	963.648		113.824	842.676	774.704	815.193	829.202	876.787	820.307		116.421	897.629	830.952	851.186	861.295	905.955	1050.66	966.23	886.486	987.913		108.876	992.234	1105.62	1015.28	1070.38	1017.6	1057.08	991.025	1012.21
115.475	830.886	830.195	851.724	964.521	885.648	876.035	859.294		115.315	870.836	885.729	786.442	929.1	878.92	881.876	811.895	964.901		114.847	837.32	774.624	812.454	829.376	881.493	820.408		117.445	898.236	829.181	851.124	864.496	910.469	1049.35	965.335	884.459	989.034		109.876	1007.75	1120.55	1014.05	1063.15	1014.07	1055.56	979.398	1009.24
116.498	826.957	829.36	850.042	956.726	888.459	875.788	857.994		116.338	870.863	885.014	787.819	926.835	876.06	880.576	809.424	963.068		115.87	837.449	770.227	815.049	829.775	891.88	824.529		118.468	895.222	830.715	853.565	863.222	909.216	1048.57	966.532	880.234	987.979		110.876	1025.77	1133.94	1018.62	1058.26	1014.78	1055.99	974.018	1009.54
117.52	826.904	831.541	852.359	955.964	887.29	880.163	860.198		117.361	871.559	884.501	788.128	928.685	876.761	881.788	813.065	965.238		116.893	839.034	774.722	817.912	830.446	902.476	826.344		119.486	895.192	826.237	852.752	860.554	908.873	1049.41	963.455	874.651	988.344		111.876	1051.8	1141.56	1020.98	1061.07	1021.87	1057.39	976.613	1019.29
118.543	826.4	828.29	854.734	952.625	886.358	872.622	854.517		118.384	870.436	885.062	790.333	930.152	879.368	882.375	812.463	963.768		117.916	835.436	770.632	813.615	829.354	909.726	824.303		120.509	898.537	832.202	858.313	865.169	911.182	1054.54	968.08	878.669	993.402		112.876	1060.55	1137.57	1018.57	1061.89	1026.77	1056.18	973.381	1018.27
119.568	829.198	829.033	860.975	950.949	886.008	867.882	852.02		119.407	868.771	882.29	784.507	927.498	876.475	879.656	808.754	960.156		118.939	838.234	770.682	812.514	829.343	920.693	825.88		121.532	896.209	829.256	857.806	863.137	910.998	1053.48	967.358	868.957	987.523		113.876	1071.05	1134.38	1017.91	1060.09	1031.56	1052.55	972.195	1023.34
120.944	835.355	829.879	867.049	948.22	883.933	857.554	853.932		120.43	869.551	883.242	787.25	929.099	876.047	882.151	810.452	963.729		119.964	835.273	767.87	817.737	830.48	936.919	833.351		122.555	898.3	830.304	860.285	863.345	911.246	1051.66	968.663	857.436	991.922		114.876	1076.71	1129.02	1014.86	1063.48	1037.69	1054.7	973.567	1025.79
122.116	838.769	828.036	871.642	949.081	884.496	850.756	852.575		121.453	870.098	885.982	786.857	928.717	876.176	881.298	810.171	963.98		120.989	839.753	768.94	817.947	830.892	945.392	833.756		123.578	894.926	830.22	861.817	862.539	908.761	1052.1	968.512	831.866	988.784		115.876	1078.87	1110.75	1016.59	1068.89	1046.71	1053.18	978.479	1035.33
123.286	843.183	825.229	876.914	947.187	880.627	843.819	853.207		122.476	871.246	886.043	786.262	929.687	878.952	882.78	810.802	964.447		122.006	837.453	767.596	815.641	828.754	954.11	831.511		124.601	897.182	830.656	862.982	864.666	906.099	1052.22	966.146	821.205	990.058		116.876	1076.2	1092.74	1015.35	1074.25	1050.21	1054.36	984.008	1040.46
124.311	849.934	826.354	882.887	951.283	877.164	844.291	857.001		123.499	869.323	882.856	785.966	927.704	876.932	880.381	808.901	964.385		123.03	841.948	769.124	815.316	828.759	964.882	832.531		125.618	892.894	828.344	863.211	862.584	906.316	1048.63	966.711	814.241	986.541		117.876	1069.79	1064.44	1010.33	1074.75	1055.32	1050.89	985.045	1044.84
125.334	852.934	824.051	882.402	950.883	869.777	839.35	855.089		124.517	873.556	885.344	787.663	931.585	880.575	883.376	813.22	964.651		124.054	839.585	770.138	814.078	830	967.67	828.843		126.64	897.391	830.852	867.331	864.568	911.603	1050.74	965.766	815.083	989.878		118.876	1063.26	1049	1017.6	1084.67	1064.69	1055.76	995.93	1058.81
126.352	853.736	827.174	880.255	951.699	856.48	836.7	859.541		125.54	869.724	881.863	788.08	927.835	874.583	882.251	810.069	964.31		125.078	838.681	765.934	815.639	828.991	970.768	826.941		127.663	895.26	829.354	867.954	863.325	910.341	1050.35	964.731	815.426	988.195		119.876	1037.1	1022.05	1014.31	1082.37	1062.51	1052.06	997.869	1059.97
127.375	855.203	825.705	878.097	955.048	842.415	840.249	860.864		126.563	868.187	881.72	785.092	925.969	875.633	877.731	806.466	960.638		126.097	838.432	767.599	817.627	827.747	965.832	823.351		128.685	896.377	831.558	870.722	863.077	909.066	1052.38	964.533	822.015	989.193		120.876	1007.79	1015.49	1016.86	1088.89	1069.65	1053.96	1007.39	1065.97
128.399	851.41	824.054	871.531	958.409	831.127	841.264	861.234		127.587	871.493	882.985	787.483	927.497	876.659	881.656	811.094	963.572		127.117	839.1	770.955	816.215	828.018	965.249	819.793		129.708	896.985	829.654	877.781	865.812	908.586	1053.8	964.956	832.588	990.249		121.876	977.391	1009.07	1014.26	1086.59	1061.19	1052.34	1006.9	1065.3
129.422	847.124	829.401	865.849	961.742	824.971	843.671	860.091		128.61	867.327	881.116	783.888	925.147	870.991	878.427	807.171	959.854		128.14	841.765	768.032	819.984	832.08	964.272	819.567		130.731	896.422	832.578	876.543	864.896	905.896	1052.45	963.662	843.18	990.056		122.876	964.456	1004.4	1014.39	1083.93	1054.14	1051.49	1012.52	1068.34
130.44	842.182	831.663	863.689	966.24	825.669	851.688	856.501		129.633	869.798	881.731	787.174	926.731	873.245	879.793	809.999	962.348		129.16	838.785	764.809	817.961	830.897	955.331	816.585		131.754	897.079	829.45	876.065	863.71	906.939	1052.94	960.795	858.269	987.968		123.876	960.261	1012.7	1017.71	1084.81	1042.91	1052.81	1014.58	1069.13
131.463	836.275	828.985	861.501	966.369	824.71	857.073	858.226		130.656	866.099	881.168	788.185	922.822	870.572	878.281	806.601	961.791		130.185	837.006	768.396	818.514	830.091	941.25	813.941		132.778	894.518	827.674	874.655	859.745	902.469	1048.38	959.537	863.51	985.898		124.876	957.172	1019.46	1018.37	1084.86	1032.31	1056.94	1016.3	1069.93
132.486	830.362	829.419	857.629	967.847	828.368	857.225	857.443		131.679	869.292	882.158	789.317	929.381	874.315	880.388	808.855	963.667		131.21	837.097	764.951	817.608	831.62	923.874	812.874		133.802	897.39	832.269	878.629	863.121	908.209	1053.95	962.581	878.345	989.927		125.876	957.5	1030.59	1019.06	1079.94	1022.12	1052.89	1016.6	1072.06
133.509	831.072	829.554	857.073	968.659	829.286	860.164	856.482		132.702	868.699	882.59	788.612	927.245	874.031	880.422	808.619	960.593		132.234	836.819	765.854	819.151	828.318	895.605	815.471		134.825	895.361	830.863	871.628	863.603	903.933	1050.84	959.443	883.237	990.973		126.876	961.541	1038.32	1016.49	1078.14	1013.84	1054.01	1015.71	1068.19
134.528	834.94	830.578	858.563	970.806	833.932	860.788	858.561		133.725	869.775	880.672	788.262	925.317	873.528	879.195	809.927	959.96		133.26	836.301	765.315	817.75	829.412	884.14	816.025		135.851	895.002	829.689	865.146	863.456	900.195	1048.46	955.456	884.222	986.039		127.876	970.427	1058.86	1023.74	1079.37	1012.51	1058.83	1018.92	1070.23
135.551	835.246	833.648	861.236	973.453	843.364	861.993	859.63		134.747	868.195	883.085	788.04	926.397	876.284	881.068	808.881	964.288		134.285	833.365	765.417	820.17	829.758	872.346	817.435		136.875	892.927	830.654	863.381	862.067	898.354	1048.12	950.738	884.535	985.417		128.876	980.714	1074.39	1021.62	1073.49	1010.54	1060.15	1016.36	1070.38
136.574	832.607	829.164	861.351	971.017	848.786	860.097	856.614		135.77	870.439	881.212	789.579	929.46	875.88	878.424	809.758	961.765		135.305	835.1	765.579	818.109	828.958	873.196	819.795		137.896	894.826	828.896	855.995	864.171	894.381	1049.14	947.938	886.745	988.373		129.876	990.093	1091.57	1022.68	1069.04	1011.88	1058.1	1014.74	1065.87
137.596	833.137	831.7	864.558	967.853	857.005	859.236	854.666		136.793	871.3	881.307	788.748	927.258	872.112	880.703	808.439	961.026		136.328	836.924	763.551	819.11	828.02	872.714	823.914		138.917	894.41	831.468	846.889	861.849	892.577	1046.82	934.883	886.535	986.943		130.876	1005.2	1107.19	1027.89	1069.27	1018.6	1064.31	1017.18	1068.4
138.621	838.241	833.619	871.894	966.401	865.445	857.808	856.164		137.816	868.883	880.541	787.968	925.565	869.307	877.063	808.608	960.003		137.351	838.946	767.369	821.114	831.979	875.371	827.851		139.942	892.108	829.069	839.686	861.654	884.632	1044.3	909.158	885.383	984.544		131.876	1015.26	1111.55	1024.87	1069.67	1020.12	1058.91	1010.21	1066.76
139.646	842.5	833.305	873.928	961.885	876.006	859.932	859.949		138.838	870.613	882.617	788.686	927.106	872.92	878.895	810.836	962.413		138.376	836.48	763.709	819.328	830.407	879.387	828.304		140.967	894.317	829.33	833.513	861.349	880.171	1045.56	876.789	886.83	982.609		132.876	1025.24	1108.54	1019.99	1063.54	1020.93	1055.62	1000.56	1060.66
140.669	847.296	834.644	877.453	957.071	880.026	855.132	860.495		139.861	868.43	879.346	786.78	925.163	869.379	878.749	808.661	958.703		139.4	832.947	762.017	818.251	830.524	883.837	827.124		141.993	896.498	829.182	831.164	861.617	877.658	1048.52	854.939	884.375	986.231		133.876	1038.47	1108.54	1027.56	1069.61	1035.07	1062.88	996.777	1061.82
141.688	848.592	833.737	877.805	953.14	882.355	852.921	860.918		140.886	870.429	880.282	787.321	927.856	873.131	880.177	808.872	960.863		140.426	837.413	764.73	821.078	833.793	897.766	825.949		143.017	891.869	828.645	828.828	862.351	870.91	1046.65	846.917	877.178	984.869		134.876	1041.84	1108.21	1026.01	1073.78	1044.61	1065.44	983.743	1054.31
142.712	848.941	830.49	875.54	944.437	882.471	853.447	860.103		141.911	868.476	878.493	787.702	925.595	870.506	878.625	807.4	959.545		141.45	836.119	765.111	821.593	831.907	904.442	824.404		144.042	893.118	831.974	825.866	864.492	866.533	1046.87	846.49	873.59	988.64		135.876	1041.87	1089.44	1024.77	1073.35	1049.71	1062.84	974.068	1037.93
143.731	851.875	834.801	876.846	943.315	886.655	852.954	860.146		142.936	870.764	883.619	792.517	927.656	874.404	883.625	811.019	961.931		142.474	834.859	761.205	817.981	829.017	913.208	818.416		145.066	895.332	832.88	828.385	864.308	862.163	1048.61	850.362	857.71	991.551		136.876	1039.16	1070.07	1022.6	1077.56	1057.54	1060.23	973.366	1024.57
144.756	850.566	837.698	875.795	942.722	885.941	854.755	857.745		143.96	870.403	881.08	791.944	928.954	872.943	881.364	807.39	963.112		143.498	836.651	761.604	820.271	834.002	929.023	817.686		146.091	894.199	834.468	827.809	861.703	859.051	1047.61	858.847	827.795	991.092		137.876	1037.08	1033.19	1019.87	1078.34	1064.51	1059.58	969.144	1015.37
145.78	844.675	834.809	874.178	939.962	885.005	855.72	860.909		144.984	867.086	877.69	789.314	928.029	873.105	877	807.008	959.855		144.523	835.954	760.395	820.054	830.618	934.503	814.402		147.116	891.715	832.846	827.422	863.27	859.042	1044.68	868.985	817.069	987.528		138.876	1028.98	1022.12	1018.2	1082.89	1074.44	1059.25	972.404	1010.54
146.804	839.379	831.716	871.436	939.621	888.686	856.292	858.754		146.009	871.16	881.274	788.332	925.615	871.186	881.069	809.053	959.685		145.546	836.512	763.256	820.877	829.961	940.01	810.148		148.142	885.597	827.859	826.049	859.626	860.968	1044.88	875.679	813.483	981.731		139.876	1012.03	1013.32	1021.77	1081.55	1072.77	1054.27	974.323	1007.05
147.824	839.571	832.671	868.298	942.943	882.548	855.059	859.869		147.033	875.21	880.282	792.057	929.993	872.868	882.213	811.934	962.917		146.571	837.042	765.18	824.354	834.112	946.089	815.317		149.167	885.324	831.951	832.234	862.266	867.236	1048.24	893.673	814.534	984.365		140.876	1000.08	1012.47	1020.22	1082.88	1075.79	1056.05	975.264	1007.74
148.848	836.362	830.944	871.207	946.338	883.258	854.788	858.941		148.061	868.452	879.193	790.805	928.444	874.424	878.863	807.185	962.329		147.596	835.848	765.417	821.876	832.177	942.605	814.239		150.192	880.877	829.021	831.476	860.195	869.875	1042.33	905.517	816.964	981.198		141.876	992.888	1018.73	1020.28	1085.54	1077.72	1060.57	981.363	1011.58
149.873	830.714	829.605	869.642	945.19	878.575	854.334	860.31		149.086	867.023	877.889	788.012	925.558	869.669	880.415	807.427	961.426		148.622	835.395	765.157	824.936	834.613	934.191	815.514		151.211	878.586	828.998	835.063	859.84	877.059	1042.8	919.726	821.303	977.694		142.876	983.958	1021.63	1017.67	1079	1069.47	1056.51	988.477	1014.12
150.898	837.151	832.201	872.527	947.23	877.063	857.196	859.171		150.109	867.542	878.141	787.835	924.508	870.645	876.77	807.773	957.518		149.647	833.349	760.728	823.067	831.543	907.479	816.188		152.23	874.52	829.808	839.649	860.473	878.733	1041.87	932.154	831.185	976.473		143.876	985.878	1028.22	1021.29	1086.37	1063.21	1060.54	998.849	1018.66
151.924	837.568	828.643	871.049	953.496	871.101	859.749	860.484		151.134	867.362	878.269	786.48	925.76	873.756	878.49	807.142	959.28		150.672	834.766	764.167	823.636	833.188	885.604	816.997		153.254	873.214	832.785	849.985	861.373	886.687	1046.32	947.827	843.48	978.877		144.876	982.098	1033.29	1018.16	1084.32	1038.9	1057.43	998.063	1020.31
152.949	836.195	830.601	869.735	951.151	856.39	862.055	858.121		152.159	867.865	878.769	790.236	926.122	871.496	877.315	809.204	959.417		151.695	836.457	763.869	824.411	832.741	873.36	816.893		154.278	862.154	833.676	848.95	858.583	887.43	1041.09	953.036	854.028	975.367		145.876	984.965	1046.92	1021.71	1082.09	1023.83	1058.97	1003.89	1027.12
153.974	838.093	829.266	872.058	954.49	837.242	861.046	859.113		153.182	867.267	880.73	787.836	926.069	872.237	880.225	807.581	960.334		152.718	836.617	762.782	822.303	832.723	868.388	820.947		155.303	848.312	829.94	853.666	858.375	887.672	1039.81	953.89	859.68	969.838		146.876	990.717	1062.04	1019.39	1084.4	1017.49	1058.82	1009.53	1033.4
154.992	840.27	829.987	869.493	954.676	828.12	861.615	857.273		154.206	868.571	876.739	786.962	925.098	873.553	877.811	807.916	959.769		153.741	834.655	762.076	822.781	830.332	862.553	818.489		156.33	830.539	829.679	858.75	859.461	891.81	1040.19	957.49	870.522	967.497		147.876	994.958	1076.85	1022.98	1084.48	1014.05	1063.55	1013.61	1044.66
156.012	844.13	834.039	870.408	955.971	826.429	864.166	863.534		155.231	867.575	879.122	790.319	926.122	874.614	880.158	809.647	959.887		154.764	840.213	764.146	827.08	833.571	872.289	818.422		157.354	818.85	831.368	863.294	860.235	897.073	1040.93	961.195	881.747	964.497		148.876	997.641	1085.37	1026.21	1084.22	1013.3	1060.04	1012.84	1049.62
157.037	845.432	831.414	872.446	953.105	822.797	861.131	861.388		156.256	869.569	880.361	791.424	927.475	873.52	880.928	809.629	962.265		155.787	835.808	761.996	824.224	836.284	875.383	817.868		158.377	809.379	829.929	860.605	859.179	894.508	1036.96	961.964	883.31	957.072		149.876	1003.12	1089.32	1026.02	1083.99	1011.24	1056.78	1013.52	1053.27
158.06	849.11	835.307	875.024	953.079	824.945	864.999	863.826		157.281	868.392	878.187	791.28	925.463	868.727	877.16	806.214	959.186		156.81	838.286	762.903	826.187	832.412	880.469	814.007		159.401	802.819	829.143	858.869	856.557	891.608	1035.58	960.183	883.96	943.527		150.876
159.084	849.249	832.525	875.006	949.043	824.036	859.775	860.353		158.305	868.762	880.151	791.137	927.013	872.963	879.955	808.301	958.879		157.833	836.617	760.12	821.232	832.242	886.537	810.011		160.425	806.076	831.167	858.683	859.017	891.127	1035.07	961.92	883.954	932.74		151.876
160.109									159.33	869.143	876.526	789.612	924.521	872.282	877.629	808.842	958.519		158.856	839.38	763.775	827.289	833.819	901.119	813.732		161.449	802.88	828.344	849.353	855.771	880.791	1031.47	964.178	883.778	919.478		152.876
161.133									160.354	868.266	877.154	790.228	926.796	870.075	877.246	808.116	957.269		159.879	836.364	764.358	826.35	832.73	907.641	810.025		162.473	803.008	827.962	837.518	850.852	871.1	1026.89	959.024	881.664	898.105		153.876
162.158									161.379	869.632	879.655	792.39	927.202	874.509	881.314	809.129	960.259		160.903	840.009	764.436	825.388	834.878	918.195	811.113		163.497	807.184	824.935	828.997	847.064	861.163	1021.02	953.84	876.103	888.289		154.876
163.178									162.404	869.848	880.631	793.408	926.041	874.209	878.911	809.791	961.223		161.926	834.421	761.935	826.283	830.561	921.957	811.787		164.516	811.102	826.456	825.961	840.257	855.222	1016.24	951.229	869.158	885.449		155.876
164.202									163.428	867.666	879.1	789.89	923.931	872.212	878.229	809.203	959.476		162.949	838.171	763.557	826.375	833.631	930.744	810.698		165.539	819.094	824.578	821.464	829.664	854.837	1006.22	941.46	843.254	885.254		156.876
165.223									164.453	867.291	878.99	789.863	924.788	872.837	876.875	810.23	958.632		163.972	837.775	763.042	825.877	833.174	934.515	812.612		166.561	822.042	817.704	817.611	825.225	853.575	980.876	917.232	822.048	887.019		157.876
166.243									165.477	868.41	877.724	789.705	926.09	872.482	879.229	810.654	958.727		164.995	840.788	763.643	828.507	833.606	935.381	813.376		167.584	826.834	809.474	815.792	818.659	855.522	946.936	872.122	814.789	888.183		158.876
167.266									166.501	866.822	875.899	784.912	921.056	868.196	877.448	806.059	954.929		166.013	838.816	762.776	826.745	834.764	935.321	816.821		168.607	834.605	799.578	814.422	816.867	857.821	917.185	850.551	812.195	892.485		159.876
168.289									167.526	871.564	881.449	789.607	925.309	874.775	878.46	809.947	961.332		167.036	838.198	763.433	827.32	836.007	932.14	819.164		169.63	844.371	802.114	819.514	816.775	865.001	903.758	847.722	818.063	904.693		160.876
169.312									168.551	867.838	876.099	787.084	924.32	871.18	877.747	808.829	956.942		168.059	836.603	762.207	825.384	834.008	919.018	812.72		170.654	851.08	794.775	816.797	814.809	866.037	892.627	846.402	819.459	910.216		161.876
170.335									169.57	866.364	875.802	784.066	922.857	872.347	875.866	805.48	954.029		169.254	838.744	763.297	827.531	837.072	902.896	815.417		171.677	849.131	789.188	817.52	809.729	866.205	886.269	844.38	824.374	914.212		162.876
171.358									170.595	866.72	876.295	784.208	922.648	872.477	875.751	807.437	957.274		170.428	838.416	761.606	828.033	837.565	881.35	812.803		172.7	855.517	793.136	828.947	817.068	872.528	889.775	851.699	836.22	927.633		163.876
172.381									171.619	869.419	877.587	786.859	922.459	872.433	875.161	807.934	958.252		171.599	840.863	764.863	827.229	836.396	866.614	811.046		173.723	853.923	791.778	833.592	814.676	876.043	892.706	860.141	849.086	937.882		164.876
173.399									172.643	865.46	875.895	785.08	920.552	870.662	876.073	806.331	957.105										174.741	855.379	793.761	840.579	819.131	880.834	895.349	871.839	859.753	941.778		165.876
174.422									173.666	870.84	877.622	788.244	925.185	871.693	877.691	810.252	958.422										175.759	853.101	793.724	847.656	818.775	884.694	902.076	886.334	868.276	951.354		166.958
175.445									174.689	863.671	872.695	782.604	918.9	869.581	874.453	807.354	955.229										176.781	851.904	795.862	856.381	821.618	884.679	909.034	899.167	873.487	957.836		167.959
176.469									175.707	866.926	878.849	785.646	923.219	871.384	877.854	808.388	957.838										177.804	844.25	796.319	859.073	826.223	877.192	917.588	913.715	877.822	959.371		168.957
177.492									176.73	868.71	877.752	786.307	922.319	870.048	878.129	808.246	957.196										178.827	833.877	795.507	861.158	825.665	865.747	923.48	924.129	877.137	962.145		169.955
178.515									177.753	869.297	877.769	786.527	925.821	874.144	878.274	809.646	962.143										179.85	826.229	798.488	868.595	831.803	859.552	937.224	934.327	880.04	961.893		170.953
179.533									178.776	867.138	876.642	786.7	925.697	872.392	876.555	808.874	957.062																					171.951
									179.799	864.716	872.048	783.15	920.649	868.559	875.989	806.832	955.422																					172.95
																																						173.948

## Sheet: 100 nM ATP (fura2)
Rel. Time (s)	Mean of ROI Object 1 (Fura 2)	Mean of ROI Object 2 (Fura 2)	Mean of ROI Object 3 (Fura 2)	Mean of ROI Object 4 (Fura 2)	Mean of ROI Object 5 (Fura 2)	Mean of ROI Object 6 (Fura 2)	Mean of ROI Object 7 (Fura 2)		Rel. Time (s)	Mean of ROI Object 1 (Fura 2)	Mean of ROI Object 2 (Fura 2)	Mean of ROI Object 3 (Fura 2)	Mean of ROI Object 4 (Fura 2)	Mean of ROI Object 5 (Fura 2)	Mean of ROI Object 6 (Fura 2)	Mean of ROI Object 7 (Fura 2)		Rel. Time (s)	Mean of ROI Object 1 (Fura 2)	Mean of ROI Object 2 (Fura 2)	Mean of ROI Object 3 (Fura 2)	Mean of ROI Object 4 (Fura 2)	Mean of ROI Object 5 (Fura 2)	Mean of ROI Object 6 (Fura 2)	Mean of ROI Object 7 (Fura 2)	Mean of ROI Object 8 (Fura 2)
0	958.798	1010.46	991.794	953.619	968.584	974.455	1412.66		0	842.899	781.829	807.362	910.449	879.497	844.408	913.255		0	1027.66	966.425	1049.81	950.605	881.3	1004.06	846.989	872.2
1.17303	962.508	1010.19	994.204	956.758	972.319	979.476	1420.66		1.1722	839.28	780.266	807.715	907.93	875.827	842.159	914.801		1.17492	1130.24	966.944	1050.16	948.401	884.579	1004.34	847.472	870.449
2.34345	962.166	1012.21	993.323	959.209	973.446	979.781	1420		2.34348	837.105	777.182	801.84	904.988	873.352	839.334	900.09		2.34545	1122.36	964.316	1045.3	944.907	878.384	998.09	844.478	868.795
3.51363	960.018	1010.4	985.846	954.998	969.015	978.658	1416.45		3.50878	839.135	779.835	806.221	904.496	877.108	841.022	902.041		3.51649	1087.78	964.678	1044.39	945.971	878.779	998.197	846.466	869.43
4.68497	958.043	1007.72	981.594	952.527	969.395	975.187	1413.21		4.68021	833.824	773.873	802.267	901.106	871.822	838.988	894.707		4.68773	1073.92	966.12	1045.12	943.119	880.265	1001.18	843.362	868.416
5.85417	958.629	1007.95	980.848	950.922	966.601	974.145	1413.06		5.85103	840.835	773.418	805.847	902.507	875.714	840.551	907.092		5.85877	1084.62	964.731	1041.01	941.442	879.016	998.586	841.867	865.997
7.02553	956.612	1004.14	980.683	949.815	964.647	974.154	1410.52		7.02151	838.108	771.672	805.445	904.084	874.687	839.222	902.646		7.0304	1011.45	966.778	1044.29	942.767	878.155	1000.4	841.158	867.128
8.19636	958.588	1004.98	979.551	951.988	964.716	975.595	1411.33		8.19288	834.961	771.38	800.254	896.56	870.941	838.253	905.629		8.2015	914.204	964.96	1039.1	939.666	878.354	997.715	840.374	866.149
9.36607	957.198	1007.93	978.089	951.469	966.135	975.331	1409.03		9.36437	833.539	769.829	799.411	893.837	871.073	837.51	899.005		9.37194	963.281	964.359	1038.09	941.097	879.036	992.715	839.971	865.452
10.5375	954.503	1002.48	977.458	946.405	962.859	970.154	1405.47		10.5345	834.253	762.82	799.035	894.866	870.589	838.658	892.415		10.5422	931.629	965.61	1038.01	939.444	879.277	995.297	838.669	863.586
11.708	958.533	1004.19	978.331	948.255	965.45	972.925	1408.67		11.7046	836.751	767.443	800.844	894.497	870.499	836.792	898.68		11.7126	873.042	966.025	1038.25	938.606	880.009	995.637	838.551	864.22
12.8778	956.889	1003.17	979.813	948.232	965.917	975.792	1409.9		12.8748	833.117	763.695	797.714	892.341	867.67	835.768	892.333		12.8845	988.405	963.192	1033.97	934.751	876.035	993.937	836.944	862.991
14.0477	955.2	1000.6	979.516	947.002	962.656	968.991	1407.05		14.0444	830.97	763.73	798.588	891.586	867.4	835.813	905.385		14.0555	932.984	958.263	1032.36	932.964	875.456	992.624	835.07	860.932
15.2176	956.731	1003.44	981.468	945.941	964.575	972.228	1410.86		15.2144	831.351	763.564	799.378	890.122	869.9	836.677	898.348		15.2261	885.545	960.38	1032.05	933.036	873.194	989.049	835.046	861.514
16.3876	958.171	1004.4	982.871	948.461	963.715	974.479	1410.19		16.3848	828.768	761.198	795.863	889.072	867.26	832.364	890.976		16.3961	913.289	958.614	1030.29	932.177	873.245	986.538	833.935	857.449
17.5583	956.496	1003.14	979.697	944.538	961.246	972.354	1408.72		17.5548	829.974	759.805	794.163	889.437	864.885	833.284	888.804		17.5676	963.571	960.013	1031.58	931.011	875.426	988.382	833.04	858.179
18.7283	952.538	997.975	977.523	944.631	959.46	965.58	1401.18		18.7253	831.517	761.158	796.95	891.127	866.144	832.586	884.89		18.7384	941.768	963.385	1032.95	932.414	877.49	991.229	835.783	861.656
19.8981	953.837	1000.07	976.373	943.187	960.946	968.334	1406.05		19.8956	822.696	756.949	797.535	885.907	864.713	836.645	877.883		19.9094	961.843	958.94	1026.31	928.454	872.195	986.732	830.826	858.605
21.0679	955.065	996.562	975.388	941.914	960.7	968.384	1403.07		21.0652	822.653	755.767	796.463	888.192	865.175	835.733	878.981		21.0812	928.703	957.067	1023.69	928.792	871.112	985.91	828.937	855.349
22.238	950.9	999.364	974.069	941.695	958.558	964.051	1398.02		22.2345	822.505	757.122	794.921	888.893	866.444	835.397	876.057		22.2475	885.019	958.893	1024.96	928.68	874.611	988.083	831.003	857.184
23.4087	954.628	997.111	973.774	939.795	954.964	964.315	1397.82		23.405	823.663	757.253	795.747	889.69	862.524	833.55	877.466		23.4193	890.661	955.344	1023.97	924.955	873.406	986.486	829.145	854.517
24.5791	952.484	996.649	975.891	941.931	958.651	965.425	1395.91		24.5758	824.245	757.11	795.77	889.636	864.249	833.443	881.198		24.59	884.364	957.467	1022.93	926.89	872.009	984.137	827.931	854.527
25.7446	946.401	992.33	971.639	938.671	952.216	961.383	1388.78		25.7468	821.567	757.47	797.302	885.361	862.154	832.726	871.89		25.7602	888.497	960.201	1025.27	927.738	874.139	985.429	829.334	855.744
26.915	949.486	994.242	971.48	936.556	955.81	961.21	1385.41		26.9175	821.71	757.858	796.717	880.134	860.644	834.644	871.339		26.93	893.428	955.483	1020.41	922.324	872.703	980.514	825.889	853.884
28.0863	945.439	992.105	966.602	935.924	952.561	957.52	1380.74		28.0874	819.423	755.066	793.615	880.658	859.046	830.715	873.221		28.1006	950.949	955.647	1016.12	920.616	866.599	976.539	825.632	849.942
29.2562	941.988	989.782	966.622	932.876	948.388	957.844	1379.06		29.2584	819.835	755.368	792.359	881.619	858.364	829.509	867.144		29.2706	940.436	957.013	1020.46	922.384	871.235	983.306	825.188	853.978
30.4277	945.276	991.476	966.248	932.685	949.164	959.221	1377.5		30.2829	819.213	756.9	791.629	877.991	858.442	830.042	869.702		30.4428	934.564	957.678	1020.83	921.625	874.365	984.094	827.178	855.217
31.5935	946.268	991.975	970.32	935.556	951.627	960.179	1380.16		31.3058	821.08	759.461	794.005	879.683	861.223	829.347	890.992		31.6147	915.251	954.997	1017.37	921.964	870.271	978.234	824.084	853.691
32.764	943.884	990.226	965.477	933.546	947.328	956.178	1374.06		32.3289	820.889	759.263	794.633	881.749	861.667	832.666	887.938		32.7815	895.137	955.163	1017.34	920.893	871.978	979.291	821.083	851.866
33.9356	944.406	992.198	967.592	933.253	949.764	958.86	1379.24		33.3518	820.004	760.402	792.189	880.414	857.125	828.455	881.053		33.9535	895.269	956.543	1017.02	919.856	873.173	978.161	825.425	852.595
35.1068	943.072	994.983	969.558	933.609	951.193	960.327	1379.51		34.3749	819.816	760.263	790.673	877.447	858.347	829.29	881.446		35.1248	866.321	951.486	1014.54	918.071	871.69	975.185	822.629	847.238
36.277	943.591	989.287	965.555	933.859	948.583	955.058	1380.68		35.3978	819.727	758.532	794.866	878.733	858.418	830.287	882.125		36.2965	902.442	954.756	1013.63	916.52	870.29	974.763	820.656	848.627
37.4465	943.509	987.901	966.824	931.592	945.531	956.779	1378.39		36.4209	819.251	759.775	792.207	875.304	858.807	830.017	872.834		37.4656	880.472	957.454	1016.92	920.754	873.293	978.365	824.582	852.761
38.6173	944.966	985.939	963.666	930.674	946.696	957.283	1378.58		37.4438	819.712	762.606	792.617	876.006	858.519	829.068	868.923		38.6356	824.886	954.476	1012.66	916.816	872.809	975.012	821.996	849.321
39.7823	943.659	989.93	965.101	929.512	945.234	956.534	1381.09		38.4668	819.259	755.033	791.715	875.92	857.438	829.69	863.23		39.8067	832.882	952.139	1011.67	913.581	870.24	972.691	819.653	846.737
40.9532	944.828	991.435	967.212	932.206	950.685	958.637	1382.98		39.4898	818.827	757.259	792.609	875.276	859.228	829.913	861.208		40.9736	865.131	953.599	1012.06	916.103	869.473	972.222	822.882	848.324
42.1228	945.941	989.26	967.156	930.614	948.413	957.117	1382.89		40.5128	817.412	761.263	790.43	872.889	859.252	827.772	867.31		42.1448	795.245	953.084	1012.45	915.062	872.948	974.353	820.371	847.579
43.1463	943.404	988.353	963.289	927.525	949.208	955.354	1378.93		41.5379	817.608	759.564	793.855	875.979	855.536	828.866	873.239		43.3155	784.568	951.319	1009.89	914.755	873.124	974.469	820.371	847.787
44.1643	943.846	988.755	963.648	929.541	948.56	956.812	1382.37		42.5609	817.607	764.479	791.158	876.633	857.664	830.009	872.961		44.485	771.96	950.75	1008.25	915.323	869.861	971.498	819.826	845.143
45.1873	947.354	991.637	970.114	932.872	953.417	958.952	1386.76		43.5839	820.413	760.75	792.995	877.432	856.931	826.972	873.297		45.6554	765.22	951.426	1008.79	914.311	867.725	968.62	819.994	845.695
46.2103	944.992	990.667	968.272	932.947	951.153	958.585	1388.08		44.6018	820.883	761.688	795.097	877.158	859.432	831.7	873.259		46.8266	770.086	949.793	1006.78	912.608	867.857	970.172	818.768	847.834
47.2333	944.259	989.7	966.649	929.938	948.659	956.229	1383.82		45.6249	817.153	759.286	792.047	873.936	857.524	828.252	863.741		47.9987	769.187	949.814	1008.87	914.592	865.321	969.443	818.741	848.797
48.2513	946.135	989.479	969.486	930.986	950.172	957.969	1386.49		46.6469	815.164	764.095	792.689	873.267	854.84	827.181	858.623		49.1695	769.472	950.859	1007.51	913.025	865.536	969.147	820.611	846.164
49.2743	942.485	990.379	964.768	931.646	949.236	955.952	1385.48		47.6698	816.632	763.48	793.194	874.176	856.542	826.869	860.086		50.3409	779.129	948.968	1007.19	912.055	865.55	970.124	816.429	846.174
50.2973	944.886	992.395	968.522	931.859	950.096	959.086	1388.8		48.6928	817.225	762.924	790.9	872.741	857.259	825.961	860.108		51.5114	761.564	949.756	1005.33	912.253	864.52	971.254	819.773	844.053
51.3203	946.243	993.698	969.385	932.094	951.056	958.642	1394.21		49.7118	817.12	763.196	793.581	873.78	855.433	824.297	863.2		52.6825	757.347	949.746	1006.15	910.911	865.38	970.901	817.076	844.155
52.3433	947.599	992.816	967.319	932.242	950.131	959.014	1393.98		50.7369	816.173	760.497	789.983	871.348	855.558	828.102	860.296		53.8527	740.365	950.8	1005.04	910.427	866.518	966.768	819.792	844.259
53.3653	946.164	990.486	966.35	931.172	951.198	958.255	1393.85		51.7539	818.181	762.824	794.825	871.647	856.649	828.242	859.815		55.0236	793.553	949.534	1006.5	912.728	866.099	971.152	817.64	843.826
54.3884	945.144	990.564	965.269	929.996	949.743	956.769	1391.46		52.7739	817.183	758.291	793.21	871.531	856.805	824.675	853.46		56.1902	770.979	949.053	1003.14	907.569	863.74	963.839	814.307	842.387
55.4113	950.228	996.48	969.772	934.398	952.656	959.988	1399.46		53.7999	817.948	757.828	792.2	869.731	858.096	826.384	854.758		57.3605	765.485	951.258	1004.83	910.655	867.691	968.625	815.841	845.894
56.4343	945.952	991.734	965.781	928.507	952.195	957.792	1396.7		54.8248	816.347	757.863	790.67	870.564	858.137	825.716	856.543		58.5323	768.858	947.095	1003.43	909.168	864.72	966.988	814.412	841.501
57.4573	943.493	988.674	965.278	927.706	948.166	956.628	1393.7		55.8479	815.587	755.423	791.016	867.446	853.852	825.179	852.42		59.7025	761.314	945.686	997.92	909.579	865.568	966.392	816.001	842.792
58.4803	944.917	989.971	964.081	929.633	950.595	959.275	1393.81		56.8728	814.922	756.036	791.978	871.794	857.537	825.238	855.163		60.8732	754.129	950.249	1002.79	910.308	863.338	967.684	815.503	845.481
59.5033	948.913	994.023	965.908	929.09	952.092	959.676	1397.22		57.8979	812.551	754.926	791.32	866.609	855.873	824.469	853.16		62.0447	766.225	946.264	997.361	905.007	861.818	963.607	813.509	840.808
60.5273	945.484	992.74	966.297	929.459	950.158	958.791	1396.76		58.9229	814.802	756.211	789.94	869.661	853.846	825.537	849.885		63.2167	762.885	945.998	999.917	909.412	863.085	965.982	814.656	842.006
61.5443	950.001	992.975	971.337	930.808	955.08	960.13	1403.04		59.9509	814.837	755.376	789.033	867.106	853.729	822.682	851.793		64.3872	790.056	946.852	997.724	909.637	863.966	967.788	816.959	843.361
62.5683	946.738	993.331	963.569	926.226	950.755	956.215	1393.38		60.9758	814.207	755.05	790.324	866.972	856.046	824.48	852.918		65.5573	801.894	946.352	996.979	908.102	863.022	968.296	813.311	843.444
63.5913	946.5	994.42	968.901	929.883	951.791	959.499	1396.56		62.0009	814.21	756.466	789.212	866.846	853.867	825.727	851.174		66.7285	798.224	948.938	999.428	909.849	864.105	965.307	816.276	843.029
64.6143	948.046	995.885	966.656	929.926	951.656	960.05	1396.82		63.0248	816.005	756.788	791.598	870.727	861.456	829.301	855.681		67.8999	841.553	947.914	997.356	909.305	861.637	966.701	812.093	843.2
65.6323	945.642	991.522	966.349	927.197	949.954	956.665	1395.54		64.0438	815.282	753.603	789.379	867.33	856.177	823.886	851.256		68.9234	832.158	946.259	998.71	905.255	862.284	964.577	814.745	841.12
66.6593	944.298	988.687	964.982	922.943	944.953	953.592	1391.39		65.0639	810.466	752.717	788.458	863.981	854.856	822.063	848.561		69.9464	798.147	947.663	999.983	907.986	865.771	966.357	812.822	842.468
67.6843	952.107	994.602	967.199	928.434	952.473	959.178	1399.62		66.0838	809.506	751.41	787.459	866.235	853.207	821.442	846.591		70.9684	799.361	950.639	1002.52	909.219	864.195	966.198	817.87	843.264
68.7093	943.15	990.812	965.08	926.738	947.763	956.432	1394.61		67.1078	812.971	753.91	788.913	865.293	852.871	823.118	847.127		71.9914	783.96	948.487	999.364	906.757	864.515	966.476	815.899	842.725
69.7334	946.688	991.439	964.954	926.597	945.867	953.066	1393.39		68.1329	812.349	756.7	789.741	867.253	856.282	824.467	851.316		73.0144	775.688	947.123	997.809	907.236	864.784	965.617	815.181	843.839
70.7583	948.856	993.022	964.184	930.105	947.68	956.742	1393.56		69.1578	811.007	755.469	790.51	867.453	854.855	822.214	846.351		74.0374	774.334	945.615	996.203	906.006	862.922	965.025	814.512	844.625
71.7833	948.991	996.648	971.47	929.723	950.862	961.309	1401.87		70.1838	811.464	755.795	789.734	866.419	855.836	822.033	845.177		75.0604	784.199	945.319	998.737	909.049	862.228	966.308	817.308	843.863
72.8073	949.915	996.836	968.752	928.038	949.839	958.741	1396.13		71.2079	810.485	755.645	787.375	866.3	853.647	821.906	846.791		76.0834	791.734	945.973	997.306	908.08	861.794	964.185	812.042	841.52
73.8313	945.145	991.378	964.988	923.925	946.146	954.952	1393.9		72.2278	810.463	753.643	788.035	865.539	853.881	818.561	844.965		77.1014	779.232	945.893	998.384	907.948	864.296	964.869	814.731	842.863
74.8573	945.946	991.055	965.383	926.071	952.312	958.059	1395.63		73.2539	813.341	755.981	790.324	865.649	854.834	823.095	846.581		78.1244	775.161	946.677	998.727	908.527	864.396	964.153	814.481	842.843
75.8833	947.201	991.246	966.235	924.748	947.764	956.33	1394.79		74.2779	814.985	756.227	791.944	870.588	857.171	824.239	848.81		79.1474	786.091	950.127	997.294	906.28	863.528	968.329	817.408	844.546
76.9073	944.693	993.36	967.581	929.256	949.903	956.643	1396.98		75.3018	813.221	751.669	789.838	863.28	853.502	820.756	846.578		80.1704	794.283	949.394	999.745	912.808	866.245	970.272	817.433	844.086
77.9333	946.432	996.649	968.39	930.174	951.942	958.079	1397.72		76.3248	814.103	752.438	788.07	864.835	854.328	822.099	844.226		81.1934	775.627	942.623	997.96	908.23	863.541	962.031	814.933	842.017
78.9563	947.458	992.942	964.616	927.329	953.052	955.544	1399.19		77.3479	815.093	753.534	787.722	865.794	854.725	821.897	847.775		82.2164	782.142	945.123	999.672	907.741	867.086	966.09	817.331	845.527
79.9804	949.175	995.767	970.322	929.721	954.743	959.412	1402.98		78.3749	812.529	752.742	790.75	867.244	855.432	822.241	848.137		83.2394	768.771	945.658	995.732	903.619	862.641	963.381	814.154	841.543
81.0053	948.727	995.595	968.053	926.479	953.59	958.172	1398.44		79.3938	815.127	751.889	791.017	866.132	853.159	822.544	848.116		84.2564	770.261	947.253	997.314	910.555	865.001	966.822	816.002	845.54
82.0243	947.714	993.02	963.225	926.597	949.864	955.093	1397.08		80.4129	812.306	753.904	789.422	864.575	853.123	822.255	847.327		85.2794	778.68	946.097	995.071	908.213	865.77	966.735	813.924	842.853
83.0483	950.887	993.285	968.911	926.892	952.46	957.187	1396.45		81.4349	808.93	749.036	786.064	860.18	851.859	818.097	844.905		86.3024	760.872	951.596	1001.83	911.253	867.741	971.411	817.858	848.895
84.0743	945.45	992.499	963.78	923.55	951.291	955.371	1393.5		82.4579	815.184	751.356	788.425	864.915	852.118	820.09	848.248		87.3254	776.288	946.869	995.759	905.558	864.658	964.517	813.71	842.664
85.0973	946.849	994.497	966.184	925.208	953.481	957.283	1397.21		83.4809	812.371	750.924	788.934	866.37	851.708	819.722	850.812		88.3484	761.731	944.45	994.659	908.812	865.477	966.49	816.133	843.699
86.1213	947.918	994.886	966.59	924.359	951.529	956.117	1395.59		84.4989	813.439	753.189	788.741	863.608	853.653	821.909	850.622		89.3714	742.109	944.227	995.66	909.62	864.145	966.314	816.547	844.375
87.1453	950.354	997.162	967.106	927.896	954.016	956.829	1396.22		85.5209	809.763	750.73	785.731	862.149	849.619	818.139	846.15		90.3944	741.039	944.965	995.551	906.966	864.329	964.164	813.697	841.574
88.1693	952.48	995.927	969.148	929.205	956.039	961.393	1400.13		86.5439	812.155	748.797	786.885	861.212	851.204	820.669	846.646		91.4174	744.772	944.73	992.484	905.748	862.69	964.229	813.827	840.551
89.1943	948.806	992.031	966.161	926.065	950.297	958.488	1395.24		87.5669	811.929	750.71	789.38	861.422	849.941	818.497	848.08		92.4404	747.568	946.318	993.459	906.506	863.983	964.1	813.334	843.639
90.2183	946.842	994.442	966.469	924.313	953.732	954.863	1392.19		88.5899	812.527	748.976	788.166	863.677	852.005	819.653	845.525		93.4634	745.929	946.91	995.068	905.831	866.459	966.429	815.891	843.179
91.2423	947.205	993.476	966.271	924.778	952.602	955.296	1395.56		89.6139	808.676	750.321	787.192	863.54	849.867	817.866	844.965		94.4854	736.385	947.389	995.049	907.663	866.83	967.933	813.819	842.528
92.2663	952.186	994.931	967.391	927.537	953.748	957.895	1401.85		90.6319	807.254	747.815	785.098	860.585	851.065	819.047	842.111		95.5034	744.012	948.707	998.467	907.406	866.75	968.828	817.08	843.351
93.2893	947.957	991.578	966.327	925.52	952.124	956.235	1395.97		91.6548	806.247	745.456	785.176	859.403	848.781	815.49	842.426		96.5264	735.146	948.546	995.514	906.782	866.922	965.517	816.416	843.112
94.3134	948.822	992.428	966.31	925.208	951.768	955.29	1393.82		92.6779	808.039	747.077	786.599	861.212	847.507	815.927	841.236		97.5494	734.988	947.209	992.907	907.292	863.105	965.556	815.361	841.544
95.3373	950.883	995.098	969.487	927.598	955.31	956.263	1399.22		93.7009	809.483	749.603	788.647	862.514	849.317	817.466	843.921		98.5725	733.204	948.853	992.005	907.852	865.187	966.435	815.849	844.056
96.3603	952.792	995.971	971.458	926.001	955.176	960.357	1401.31		94.7239	805.07	744.47	783.876	858.641	846.636	816.114	838.198		99.5954	732.714	948.283	996.398	909.137	865.851	969.472	819.342	843.399
97.3823	952.619	992.045	967.799	921.649	952.564	956.494	1397.3		95.7469	806.997	746.718	785.086	859.617	848.23	817.493	837.859		100.619	731.408	946.541	993.096	906.567	864.729	966.04	814.305	840.799
98.4053	952.554	993.68	970.796	924.726	952.49	956.869	1396.73		96.7698	809.247	749.68	786.498	860.595	847.6	818.493	842.706		101.645	733.787	950.341	995.34	908.212	865.914	968.063	816.556	845.071
99.4283	947.883	990.283	965.235	921.653	949.386	954.388	1391.39		97.7928	810.358	748.883	786.384	861.155	847.811	816.868	842.442		102.668	732.33	945.848	995.613	907.544	864.724	968.517	816.793	844.435
100.45	950.873	994.572	969.978	922.059	952.899	957.304	1399.53		98.8109	809.688	747.046	783.254	859.935	849.754	816.036	840.91		103.691	731.934	944.137	991.523	907.105	863.62	965.357	814.1	840.215
101.472	949.131	990.68	966.02	918.985	950.103	957.958	1397.27		99.8289	808.992	747.201	783.439	858.252	845.967	814.738	839.992		104.716	734.729	948.504	997.31	912.02	866.475	968.92	817.424	846.747
102.495	948.198	987.771	966.852	920.408	947.814	955.768	1392		100.851	809.097	748.076	782.752	856.869	846.547	815.814	837.466		105.741	735.975	947.659	999.147	909.432	867.609	969.917	816.282	845.042
103.518	950.158	989.703	965.659	919.561	948.387	955.164	1391.07		101.874	809.153	746.655	786.499	859.986	847.937	817.292	839.257		106.765	732.388	942.646	992.817	907.107	862.246	966.371	812.914	841.749
104.541	953.331	993.485	968.135	922.829	952.143	956.673	1396.46		102.897	807.605	745.331	783.348	857.848	847.773	815.448	836.975		107.79	738.103	944.536	993.779	907.903	866.798	966.371	816.478	842.866
105.564	948.815	993.432	966.467	919.083	949.696	954.927	1390.79		103.92	808.61	745.088	786.223	858.339	848.355	812.482	835.574		108.815	737.565	946.846	996.805	907.615	865.357	966.563	815.268	842.811
106.587	948.232	993.053	965.549	921.292	949.883	956.36	1393.96		104.938	807.251	746.821	784.913	858.548	848.725	815.958	836.748		109.839	747.793	944.67	996.242	910.215	867.311	968.825	817.386	844.788
107.61	953.047	993.854	965.252	924.136	952.537	958.17	1394.89		105.957	805.367	745.886	783.731	858.009	846.352	813.826	834.099		110.863	736.258	945.412	991.795	905.509	862.815	962.928	812.129	842.183
108.633	949.048	990.597	965.88	922.77	950.98	957.318	1392.37		106.979	806.781	744.934	785.755	858.829	846.48	813.185	837.562		111.888	735.719	949.092	995.858	911.877	867.047	968.483	818.605	846.305
109.654	951.206	994.781	968.448	924.327	952.453	956.487	1394.23		108.002	807.161	744.493	785.762	855.705	846.583	810.346	840.688		112.913	736.586	946.981	993.682	906.247	864.315	967.059	816.174	841.968
110.672	953.67	993.698	967.065	924.253	953.201	956.015	1395.7		109.025	806.425	743.476	783.832	855.475	843.192	814.133	837.086		113.937	737.267	947.663	995.517	911.093	868.413	970.015	818.645	846.039
111.695	946.279	989.812	963.311	918.537	948.981	949.601	1387.82		110.048	807.198	743.086	783.2	854.629	843.815	812.392	834.628		114.961	732.419	946.107	992.145	906.412	865.227	965.81	815.92	842.793
112.718	946.652	990.674	964.171	917.186	948.62	952.371	1389.04		111.066	806.646	745.432	783.232	854.802	844.905	812.037	836.741		115.987	733.431	945.921	992.495	905.274	865.063	965.441	818.295	843.334
113.739	948.752	989.872	963.697	918.008	947.899	952.245	1391.57		112.089	806.121	744.519	782.124	856.269	844.627	814.197	835.146		117.012	733.217	948.355	995.006	905.236	866.674	969.52	817.561	843.256
114.756	950.66	990.963	965.714	921.247	951.484	952.707	1394.44		113.111	806.742	743.847	782.681	854.919	846.114	814.3	834.154		118.032	735.632	948.735	994.909	909.608	867.964	967.602	816.975	846.319
115.779	949.332	992.986	965.844	922.159	949.88	954.411	1397.06		114.134	802.697	738.693	780.273	852.666	841.439	810.884	831.561		119.058	737.816	946.297	994.171	907.293	866.691	967.891	818.81	844.719
116.802	948.724	991.663	966.348	919.361	951.781	949.841	1397.43		115.152	805.992	744.717	781.236	853.219	843.623	811.606	833.941		120.084	734.678	945.636	993.142	903.968	866.187	965.888	816.621	844.551
117.82	946.042	985.608	963.473	918.031	949.398	950.113	1391.6		116.175	806.259	743.629	780.73	853.378	844.352	811.972	831.339		121.109	735.039	949.988	998.561	909.165	867.258	967.551	817.642	846.246
118.842	948.201	988.926	965.94	919.673	948.818	951.922	1397.74		117.193	805.506	743.227	779.861	854.141	844.153	812.492	834.749		122.134	737.477	950.221	997.318	906.51	867.428	965.849	817.827	845.173
119.865	950.009	991.127	965.532	916.529	950.22	949.903	1396.41		118.217	806.462	742.979	781.903	857.949	844.019	811.931	835.057		123.16	736.952	946.096	993.652	905.778	865.389	964.097	817.757	843.473
120.888	951.59	990.137	968.814	921.317	952.073	954.999	1400.8		119.235	807.567	739.084	782.584	855.351	844.914	813.736	833.754		124.184	735.224	949.021	994.035	909.337	866.935	968.045	819.755	844.72
121.911	948.38	990.55	962.624	916.312	950.544	948.922	1394.42		120.258	807.876	739.527	783.575	856.402	844.154	813.093	832.604		125.209	734.519	944.5	993.684	906.859	866.122	963.753	817.324	844.09
122.934	949.313	989.118	964.653	916.9	948.361	951.347	1395.3		121.281	807.992	734.311	783.747	856.566	845.249	813.009	831.713		126.234	733.768	946.193	991.988	904.952	863.831	963.351	816.939	844.147
123.957	950.046	992.923	966.817	920.315	947.959	951.031	1393.82		122.304	806.615	736.712	781.471	854.907	844.033	813.446	834.504		127.259	735.998	947.034	996.853	908.457	864.961	967.224	819.485	843.643
124.98	949.593	993.303	966.875	920.774	952.168	953.147	1399.16		123.328	802.726	734.785	780.663	854.724	840.691	809.55	831.052		128.283	733.526	945.62	992.588	907.239	865.72	963.415	817.163	844.014
126.003	948.531	989.453	965.083	916.93	949.793	950.507	1394.78		124.351	802.318	733.384	782.697	851.707	841.046	808.161	830.497		129.308	735.247	949.347	996.985	908.525	867.066	968.517	818.534	847.248
127.026	948.647	987.402	963.819	915.923	944.678	949.52	1392.04		125.374	804.615	733.422	783.297	856.297	845.728	812.592	833.11		130.333	734.612	948.041	997.252	910.327	867.851	966.882	819.6	845.944
128.049	947.541	991.236	965.936	917.871	947.697	950.975	1395.52		126.397	804.153	733.3	781.846	855.158	843.169	812.754	831.006		131.353	734.51	943.944	991.74	903.821	863.9	961.24	816.293	844.568
129.072	947.253	991.109	965.193	915.697	948.524	951.666	1391.41		127.42	805.121	730.284	780.22	853.429	839.887	810.431	830.91		132.378	735.689	947.226	993.804	907.272	864.67	964.181	816.554	843.614
130.09	950.11	992.194	968.046	919.293	950.664	952.608	1399.45		128.443	802.377	733.466	781.77	854.448	839.954	810.744	830.341		133.396	734.987	950.564	995.996	907.439	867.582	968.369	818.425	845.905
131.108	948.836	988.674	964.703	916.286	948.954	948.816	1390.89		129.466	806.122	734.18	784.415	855.234	845.712	811.805	834.629		134.419	733.992	947.816	995.903	909.664	867.187	964.909	818.989	844.545
132.126	946.78	992.074	964.533	917.18	949.124	951.259	1389.02		130.489	806.832	733.953	784.867	856.463	843.127	812.48	836.195		135.442	735.234	947.235	994.404	909.685	866.548	963.701	818.072	845.449
133.149	952.545	993.808	967.776	918.65	952.954	954.687	1395.99		131.512	807.518	730.779	781.866	854.597	843.794	811.636	834.701		136.465	734.437	947.124	993.367	908.969	866.464	964.076	819.386	846.12
134.172	950.184	991.902	968.013	917.457	951.978	951.642	1394.54		132.534	804.483	731.774	781.73	853.717	843.083	810.495	833.275		137.488	735.669	945.419	993.937	906.823	862.845	963.033	817.768	843.269
135.195	949.828	989.885	968.554	915.754	947.866	950.398	1392.37		133.553	804.906	733.53	781.589	853.125	840.218	809.069	831.591		138.511	735.384	948.896	996.495	908.48	864.393	964.523	820.781	844.754
136.218	946.06	988.927	961.679	916.305	946.774	950.155	1390.08		134.572	805.334	734.357	782.632	852.688	840.108	809.554	830.481		139.534	736.232	945.527	994.288	910.328	866.225	963.413	816.646	846.042
137.236	948.556	990.72	964.754	915.7	948.458	951.864	1394.83		135.595	808.286	737.402	785.813	854.523	844.589	812.43	835.147		140.556	735.244	946.258	991.443	904.532	865.753	965.022	816.893	844.554
138.259	950.259	989.444	968.53	913.718	949.254	951.684	1391.83		136.62	806.464	737.612	782.788	852.891	842.726	811.016	833.578		141.574	734.789	945.753	994.039	907.998	864.502	963.679	818.566	844.028
139.277	951.395	990.78	964.947	915.902	951.249	952.792	1391.04		137.645	806.246	737.769	782.652	855.724	845.331	812.978	833.458		142.597	736.653	947.928	993.615	908.198	862.418	964.272	817.367	845.2
140.3	946.513	989.841	961.611	910.872	942.757	948.275	1388.23		138.671	804.372	738.946	782.909	853.32	843.689	812.553	831.787		143.621	734.546	946.432	993.386	904.807	863.872	965.947	815.225	845.091
141.317	946.517	990.334	964.468	912.395	945.69	948.737	1390.94		139.695	802.981	738.974	781.061	851.31	842.884	810.065	831.463		144.644	733.637	945.736	993.762	907.903	867.196	962.316	815.819	843.736
142.339	948.68	991.652	966.419	914.846	950.076	953.057	1392.65		140.72	805.907	741.761	783.758	855.382	844.281	812.988	833.842		145.667	733.527	944.965	992.1	905.628	864.25	964.301	816.279	845.267
143.355	950.236	990.555	965.116	915.344	951.571	950.969	1395.92		141.744	808.72	743.552	782.603	854.83	843.374	812.511	836.832		146.689	735.466	948.863	993.653	908.364	865.614	968.307	817.839	845.972
144.377	947.428	991.811	963.89	914.175	948.951	948.83	1391.1		142.764	805.597	743.564	783.777	855.353	847.407	812.351	837.661		147.712	735.358	949.545	993.128	908.726	867.419	967.527	819.906	846.239
145.395	945.732	989.823	963.104	913.859	947.369	950.386	1389.11		143.788	804.599	739.998	782.213	851.597	841.348	811.425	831.236		149.03	735.436	948.473	993.735	908.639	867.224	966.348	820.359	846.991
146.418	946.571	989.636	962.716	913.175	947.752	948.831	1389.88		144.813	806.41	741.076	784.226	854.992	842.646	811.714	833.087		150.203	731.395	945.395	990.994	903.691	864.138	961.667	814.892	843.745
147.436	945.775	986.588	962.972	912.832	947.123	948.58	1388.23		145.838	805.181	742.392	781.52	851.822	842.316	811.566	831.663
148.459	947.055	991.762	964.552	914.883	947.568	950.053	1391.14		146.862	802.839	738.602	781.343	852.29	841.826	810.735	834.383
149.482	949.09	990.354	965.379	913.771	949.437	951.396	1391.25		147.886	806.356	742.903	783.123	854.9	843.819	812.672	835.544
150.505	948.076	990.988	965.849	914.108	946.469	950.282	1392.82		148.91	804.239	742.157	783.561	851.208	841.139	811.707	833.651
151.528	948.669	990.371	965.208	913.706	949.822	951.45	1391.72		149.933	802.9	741.664	782.422	854.114	838.772	809.383	831.932
152.551	951.398	991.973	966.608	915.242	949.754	949.067	1391.4		150.958	804.903	743.89	782.744	854.446	841.541	811.966	832.626
153.574	948.952	992.327	964.486	914.063	947.249	948.618	1392.02		151.982	804.821	739.902	782.077	854.432	840.385	809.416	832.742
154.597	948.048	991.744	964.324	914.907	950.178	949.84	1393.07		153.006	805.553	742.663	783.819	850.293	841.412	809.922	831.938
155.62	946.72	992.934	962.422	914.019	948.33	947.5	1391.84		154.03	806.649	744.737	785.516	854.403	841.243	813.022	834.838
156.643	948.555	995.09	967.256	917.205	950.221	950.062	1396.17		155.055	806.861	745.995	783.954	854.443	841.259	810.514	832.745
157.666	947.046	991.172	964.141	912.892	948.535	949.595	1391.65		156.08	806.998	741.499	783.47	853.019	843.804	812.958	831.323
158.689	947.313	990.701	964.632	913.56	949.756	951.18	1396.32		157.105	805.551	742.358	782.06	853.245	841.846	810.686	833.154
159.712	948.456	989.986	964.425	913.822	949.11	950.579	1397.02		158.13	805.598	742.706	783.297	851.926	841.289	809.516	831.266
160.735	947.825	990.142	962.625	912.944	949.708	947.144	1392.61		159.155	804.866	743.209	783.337	853.467	840.788	810.426	832.24
161.758	942.985	988.396	960.978	910.863	946.28	945.273	1391.07		160.174	805.654	745.105	783.012	854.773	844.019	811.526	830.097
162.781	947.025	992.293	964.373	912.92	951.191	948.971	1395.81		161.199	805.405	744.049	784.733	853.04	843.89	811.92	835.127
163.804	948.516	991.858	964.773	912.392	950.344	949.046	1393.93		162.225	804.783	742.517	785.147	852.124	841.921	812.018	831.749
164.828	949.266	992.489	964.961	911.932	948.727	949.459	1393.79		163.25	805.955	744.164	784.855	855.245	843.899	811.601	835.819
165.851	945.297	987.61	963.225	909.056	947.071	946.29	1387.81		164.273	805.249	744.736	784.364	851.36	841.6	809.197	831.89
166.875	947.605	989.6	964.408	913.175	949.567	949.785	1394.37		165.296	802.578	741.406	781.73	850.951	841.046	810.917	830.616
167.898	947.89	994.227	964.144	912.873	949.249	949.629	1391.83		166.314	804.86	743.547	783.491	851.187	841.082	812.351	831.563
168.921	948.611	992.364	963.764	911.013	947.984	948.832	1396.42		167.337	804.172	743.717	784.549	850.902	841.297	809.602	832.501
169.944	949.926	990.934	967.182	912.898	950.598	948.396	1393.13		168.36	803.738	744.198	782.778	853.394	841.48	810.845	831.947
170.967	947.003	988.259	961.862	909.348	947.028	945.911	1388.41		169.378	803.108	743.108	784.216	851.655	841.469	812.567	831.442
171.99	948.772	989.594	964.721	910.669	949.1	946.634	1391.92		170.401	804.43	743.241	784.074	853.115	844.811	811.903	832.573
173.013	951.358	992.04	965.5	914.367	950.356	949	1393.83		171.424	802.778	743.128	781.927	850.528	841.491	810.324	830.168
174.036	950.885	990.04	964.767	910.853	948.092	948.966	1392.28		172.447	803.751	744.702	783.347	849.997	841.12	810.778	831.303
175.059	950.104	989.648	965.91	911.794	949.55	948.065	1392.12		173.47	804.551	744.985	783.577	853.216	841.327	809.732	832.88
176.081	951.799	990.175	965.512	911.3	948.591	946.768	1392.52		174.493	801.263	741.279	780.259	849.083	840.364	808.363	829.044
177.103	951.432	987.468	965.639	909.396	945.162	946.388	1388.75		175.516	801.722	742.147	783.808	850.798	841.57	809.083	830.981
178.126	952.324	989.354	969.971	913.098	947.786	947.099	1393.19		176.54	803.577	744.822	784.684	853.933	841.931	812.563	830.748
179.149	953.014	991.684	968.44	913.075	949.95	949.785	1394.02		177.564	801.59	742.757	781.597	849.761	837.907	809.171	829.969
180.172	951.232	987.431	965.91	910.725	946.056	945.544	1387.18		178.587	799.456	742.892	783.781	851.188	838.511	808.552	832.239
									179.61	801.723	743.608	785.11	852.482	840.061	811.098	831.203

## Sheet: vehicle (fura2)
Rel. Time (s)	Mean of ROI Object 1 (Fura 2)	Mean of ROI Object 2 (Fura 2)	Mean of ROI Object 3 (Fura 2)	Mean of ROI Object 4 (Fura 2)	Mean of ROI Object 5 (Fura 2)	Mean of ROI Object 6 (Fura 2)		Rel. Time (s)	Mean of ROI Object 1 (Luc)	Mean of ROI Object 2 (Luc)	Mean of ROI Object 3 (Luc)	Mean of ROI Object 4 (Luc)	Mean of ROI Object 6 (Luc)	Mean of ROI Object 7 (Luc)	Mean of ROI Object 9 (Luc)		Rel. Time (s)	Mean of ROI Object 1 (Fura 2)	Mean of ROI Object 2 (Fura 2)	Mean of ROI Object 3 (Fura 2)	Mean of ROI Object 4 (Fura 2)	Mean of ROI Object 5 (Fura 2)	Mean of ROI Object 6 (Fura 2)
0	1113.65	812.803	845.038	826.741	865.683	861.899		0	511.811	518.216	470.486	505.354	481.002	492.061	476.57		0	1264.73	814.701	941.068	798.227	1101.55	974.795
1.17443	1120.08	815.51	847.931	830.907	869.649	864.721		1.686	514.374	520.087	473.764	509.291	482.583	494.413	482.007		1.02713	1260.79	815.815	943.725	795.805	1100.43	975.969
2.34527	1117.44	809.263	843.029	825.378	867.241	862.161		2.71199	511.752	518.083	472.353	507.547	484.297	494.355	480.041		2.19739	1261.11	813.371	939.932	794.691	1098.97	973.351
3.51565	1114.86	807.866	840.9	825.139	868.291	859.412		3.73475	513.673	519.08	475.48	508.263	484.581	493.622	480.734		3.36761	1257.54	813.154	939.864	796.44	1099.47	973.341
4.68616	1121.33	812.352	843.934	824.97	866.564	860.371		4.76961	508.767	517.802	471.002	505.453	479.905	492.017	478.632		4.53766	1259.68	814.136	938.945	791.758	1099.19	972.493
5.85801	1117.28	807.864	840.753	824.786	867.693	858.054		5.69158	511.444	517.378	474.164	507.111	483.069	493.654	481.636		5.7071	1260.25	812.921	942.168	793.588	1099.56	973.896
7.02834	1121.22	807.347	841.646	823.551	869.074	857.974		6.71771	509.109	517.612	471.671	506.68	482.369	492.823	479.419		6.87692	1262.22	813.114	941.529	791.49	1098.3	973.648
8.19816	1122.42	808.484	841.303	826.411	868.223	857.503		7.74137	509.881	517.874	473.168	505.854	481.599	492.607	479.034		8.04649	1255.73	811.289	940.531	790.558	1097.98	972.076
9.36838	1122.46	807.192	839.351	824.51	866.21	854.968		8.76386	512.429	520.817	476.634	509.52	484.995	494.924	481.415		9.21167	1254.73	808.36	939.694	788.51	1094.43	969.11
10.5387	1122.92	808.312	840.922	823.08	868.27	855.389		9.68715	511.877	519.453	476.1	510.17	484.598	496.029	480.669		10.3809	1250.8	806.759	933.869	786.606	1094.58	965.746
11.7047	1120.14	804.669	838.712	821.78	865.371	857.263		10.7125	507.259	516.692	470.158	505.36	480.747	490.531	477.134		11.5503	1252.23	806.764	935.646	784.727	1095.41	968.115
12.8746	1121.82	807.392	838.971	818.957	862.932	853.848		11.7343	511.846	519.32	475.171	509.067	484.451	496.008	481.343		12.7214	1250.87	807.307	934.967	785.781	1094.46	965.039
14.0437	1122.56	807.702	840.883	822.293	866.746	855.229		12.757	509.707	516.741	472.07	506.802	482.242	494.101	479.986		13.8919	1250.52	805.263	934.837	783.297	1093.03	966.666
15.2149	1118.77	806.109	839.195	819.822	864.302	854.362		13.6859	508.319	516.657	471.63	505.606	479.782	492.219	477.659		15.0627	1247.64	803.462	935.375	783.531	1092.09	968.009
16.3852	1120.66	804.849	838.981	816.894	863.697	852.503		14.7098	510.353	518.453	474.958	508.961	484.337	494.109	482.883		16.2324	1242.88	802.529	935.124	781.044	1090.66	965.168
17.5556	1121.7	806.351	838.178	818.506	864.941	854.685		15.7313	507.073	515.133	471.511	505.582	480.848	492.039	478.427		17.4028	1242.49	803.605	934.246	781.33	1089.4	961.67
18.7265	1124.51	807.459	839.439	816.831	868.484	858.126		16.7551	507.343	517.331	473.832	508.219	482.51	493.697	479.647		18.5722	1322.86	879.376	1037.5	857.381	1177.05	1049.89
19.8975	1136.06	836.89	858.764	834.057	882.282	875.32		17.6871	510.443	518.178	472.769	505.88	482.56	493.164	480.992		19.7436	1288.93	848.566	986.668	826.307	1141.46	1018.89
21.0676	1136.09	821.029	861.797	835.053	883.398	875.31		18.7118	512.35	519.522	475.639	503.768	483.299	494.805	481.057		20.9133	1286.11	844.401	983	824.277	1141.73	1030.18
22.2383	1138.36	822.462	862.401	835.849	884.309	875.496		19.7344	515.711	522.196	478.594	509.098	488.086	498.531	485.151		22.0832	1282.31	842.048	981.402	821.063	1137.34	1024.06
23.4082	1138.04	823.99	859.452	833.787	882.791	875.405		20.7575	513.654	521.642	477.764	508.117	488.11	498.275	485.342		23.2538	1283.49	844.349	982.78	822.53	1138.72	1027.85
24.5784	1133.87	824.577	858.666	831.741	879.996	872.134		21.686	511.158	518.429	474.375	504.658	483.592	493.402	480.667		24.4236	1283.38	842.401	978.749	820.521	1138.59	1025.9
25.7481	1132.83	823.5	859.63	829.733	879.877	870.629		22.7099	513.578	521.138	478.086	508.371	486.63	496.457	483.83		25.5941	1281.29	840.233	979.072	817.248	1135.11	1027.64
26.918	1130.82	819.769	855.355	828.936	877.405	868.262		23.7322	512.562	521.012	476.944	507.588	484.311	496.933	483.737		26.7645	1280.01	840.074	978.313	819.351	1133.94	1027.09
28.0883	1128.27	819.715	853.662	823.926	874.456	866.407		24.7559	509.281	519.021	472.853	504.865	481.616	492.56	480.81		27.9292	1277.76	838.927	976.96	817.901	1132.73	1023.48
29.2593	1131.55	818.432	853.833	829.255	876.073	867.273		25.686	515.336	521.96	478.778	510.152	487.747	498.48	484.599		29.0987	1278.06	838.51	976.819	817.368	1133.44	1018.64
30.4319	1129.89	819.848	853.385	825.87	874.925	866.656		26.711	516.041	523.51	478.967	510.317	486.895	498.621	485.208		30.2689	1273.11	833.725	972.469	813.117	1129.1	1011.6
31.6028	1128.06	817.408	852.186	824.287	874.288	863.165		27.7337	511.548	520.449	474.046	505.886	482.914	492.538	481.41		31.4383	1273.22	835.038	974.277	815.425	1129.37	1013.27
32.6267	1128.07	822.293	850.013	825.419	876.817	867.4		28.752	511.173	519.222	473.629	505.18	483.805	493.615	483.14		32.6107	1268.37	832.263	970.771	810.625	1124.55	1016.25
33.6447	1133.75	826.919	853.301	827.186	876.912	866.367		29.6859	518.719	527.829	481.496	510.238	488.787	498.801	486.454		33.6341	1270.66	834.044	971.907	811.701	1128.14	1018.07
34.6677	1132.09	832.235	849.539	823.845	877.063	865.798		30.6859	512.691	521.866	474.954	507.013	485.424	496.321	480.503		34.6571	1272.58	836.215	975.762	811.381	1130.18	1017.06
35.6907	1131.27	829.664	850.856	824.753	875.121	864.242		31.6859	519.22	525.756	480.339	510.395	487.7	498.862	483.632		35.6791	1269.46	834.256	971.751	812.847	1129.09	1018.76
36.7137	1128.44	821.821	850.147	823.647	876.015	862.763		32.6859	514.341	521.342	476.708	508.61	484.551	495.955	482.999		36.7011	1270.88	836.01	975.639	810.189	1128.02	1013.25
37.7367	1130.32	819.39	848.344	823	872.529	863.318		33.6859	515.935	526.091	481.193	510.686	488.976	497.719	484.789		37.7241	1266.09	835.304	969.744	810.525	1125.63	1007.35
38.7597	1132.3	821.074	851.755	826.001	876.015	865.287		34.6859	515.158	522.225	480.191	510.907	487.354	497.601	483.83		38.7471	1268.96	832.672	971.992	812.562	1129.91	1014.52
39.7827	1131.6	819.476	848.257	823.377	873.385	862.935		35.6859	516.202	523.226	478.264	506.489	485.302	496.185	484.627		39.7701	1272.1	837.768	974.3	814.885	1132.85	1012.7
40.8057	1128.38	817.444	848.085	824.049	871.832	862.88		36.6859	519.692	527.509	482.625	514.536	490.009	501.384	487.001		40.7932	1270.43	837.32	973.288	813.511	1129.4	1008.7
41.8287	1134.45	818.541	851.537	823.102	872.3	864.375		37.6859	514.922	521.927	477.025	509.307	484.336	497.692	484.399		41.8161	1269.47	835.682	974.307	811.897	1128.14	1013.19
42.8517	1130.78	819.938	849.142	822.463	871.82	863.004		38.6809	514.668	523.161	477.913	508.66	485.745	497.778	483.232		42.8381	1265.73	832.973	971.583	809.711	1130.09	1011.27
43.8747	1131.25	817.566	848.967	822.837	871.844	863.823		39.6859	519.846	526.214	479.921	510.548	489.643	500.291	485.931		43.8611	1267.07	834.081	972.649	811.408	1128.22	1013.49
44.8977	1127.38	815.547	845.777	821.333	872.151	860.056		40.6859	515.787	525.173	479.743	511.531	488.338	498.11	485.386		44.8782	1266.13	834.227	973.051	809.351	1128.09	1014.24
45.9197	1128.48	815.091	846.32	818.798	869.853	859.095		41.6859	515.515	521.014	474.395	508.507	484.902	495.123	481.942		45.8961	1262.79	831.508	969.29	808.576	1125.95	1016.04
46.9427	1129.66	817.471	848.485	820.921	873.086	860.315		42.6859	514.909	525.13	478.036	509.357	485.659	497.456	484.484		46.9191	1264.37	834.672	973.049	811.898	1129.15	1024.02
47.9647	1131.8	818.192	848.246	821.952	873.836	862.747		43.6859	517.687	528.668	481.591	511.454	488.762	500.712	487.524		47.9422	1266.97	834.76	973.792	811.51	1129.51	1019.89
48.9877	1131.14	816.194	848.034	820.925	872.06	861.297		44.6859	516.286	525.067	478.964	510.206	486.492	497.366	485.598		48.9652	1261.59	830.382	971.182	806.743	1124.27	1021.69
50.0107	1127.77	818.873	846.62	820.443	872.092	862.301		45.6859	514.57	521.385	478.958	509.309	488.751	495.973	482.027		49.9882	1260.04	830.975	969.959	809.039	1127.67	1020.79
51.0337	1131.42	815.987	846.285	820.222	869.903	860.777		46.6859	519.532	528.032	480.539	513.117	490.546	500.46	487.419		51.0111	1263.56	830.596	971.13	809.327	1127.36	1014.39
52.0567	1129.8	816.555	846.987	820.375	869.267	858.82		47.6859	514.955	521.803	476.72	507.629	484.281	499.715	483.296		52.0342	1263.4	833.846	974.013	810.443	1128.11	1019.07
53.0787	1132.2	816.041	848.975	823.375	871.89	862.03		48.6859	520.588	529.743	480.373	513.842	489.371	500.882	487.615		53.0571	1262.9	832.227	972.08	811.444	1128.4	1010.49
54.1017	1129.04	814.55	845.703	818.989	868.603	858.639		49.6859	516.126	522.585	478.083	510.303	486.031	497.125	483.17		54.0802	1262.36	830.042	969.693	810.399	1124.45	1009.29
55.1197	1129.26	814.29	845.162	819.918	868.364	857.5		50.686	512.696	522.541	478.67	509.46	485.527	497.034	480.895		55.1031	1262.88	833.208	970.291	811.137	1127.18	1016.34
56.1427	1125.51	814.188	844.403	817.75	867.897	857.033		51.6859	518.992	526.279	480.122	513.308	490.046	500.117	487.223		56.1262	1263.16	832.954	974.766	811.609	1126.24	1014.9
57.1647	1127.75	817.894	845.932	817.734	866.615	857.79		52.686	515.646	524.71	478.854	508.455	485.578	498.205	484.284		57.1491	1261.68	830.691	969.21	809.9	1126.31	1012.84
58.1877	1128.61	817.459	844.796	820.327	870.168	859.623		53.6859	517.283	527.287	480.741	512.443	487.117	502.033	486.201		58.1682	1258.16	831.66	968.156	809.392	1124.92	1010.92
59.2067	1127.73	816.886	844.876	818.206	869.761	858.99		54.6859	515.318	524.86	479.784	511.393	488.045	499.156	485.246		59.1912	1264.59	833.229	973.886	812.988	1126.89	1013.29
60.2307	1125.36	817.921	846.562	818.833	866.828	857.927		55.6859	513.381	521.343	474.86	509.865	484.629	496.208	481.039		60.2151	1262.68	831.788	969.245	811.269	1126.12	1007.27
61.2547	1127.27	818.873	845.91	819.424	870.59	859.866		56.6859	514.484	526.324	479.932	511.286	487.158	499.501	482.886		61.2381	1261.69	833.588	970.897	811.988	1127.9	1010.62
62.2817	1126.26	818.995	847.338	821.591	872.602	860.023		57.6859	517.193	525.572	480.351	513.353	488.377	500.514	485.851		62.2622	1264.49	834.093	973.747	812.486	1132.47	1011.71
63.2997	1125.75	818.876	845.269	820.59	869.053	860.074		58.6809	513.643	521.395	477.097	509.372	486.303	497.608	483.506		63.2861	1256.67	831.831	970.667	810.571	1126.37	1006.18
64.3237	1124.55	815.611	843.096	817.516	865.322	857.912		59.686	520.001	527.986	481.268	513.303	489.162	501.053	487.764		64.3091	1262.46	832.793	971.003	811.652	1127.76	1007.49
65.3487	1124.57	817.917	843.9	817.842	868.824	859.215		60.6859	518.969	524.988	479.78	513.012	487.332	499.785	484.889		65.3322	1257.85	830.219	969.681	809.463	1127.16	1005.95
66.3727	1127.77	821.025	847.164	820.946	871.192	862.95		61.6859	513.848	520.873	477.531	508.107	483.348	496.91	482.241		66.3551	1256.89	832.344	969.218	811.065	1127.62	1003.65
67.3967	1127.39	820.988	846.276	820.119	868.478	862.386		62.6859	520.019	527.778	482.642	515.225	490.899	503.255	487.742		67.3782	1262.76	834.8	974.49	812.813	1133.65	1010.54
68.4217	1121.84	815.72	842.829	817.609	866.964	859.176		63.6859	516.091	523.055	479.5	509.184	485.561	498.051	484.514		68.4011	1255.92	831.816	970.002	810.618	1127.11	1003.96
69.4457	1126.28	820.709	844.836	819.51	868.67	862.178		64.744	515.337	522.307	480.66	510.621	485.596	500.848	484.711		69.4231	1255.84	830.6	969.019	809.489	1127.73	1004.99
70.4707	1124.21	816.337	844.432	819.941	868.136	861.9		65.7662	511.574	520.586	475.297	509.187	484.242	496.71	482.284		70.4452	1258.56	832.904	970.756	813.196	1130.82	1005.19
71.4957	1121.53	820.533	844.911	819.332	868.442	860.022		66.6879	509.153	516.988	474.737	507.576	483.88	495.773	481.88		71.4682	1256	832.832	971.788	811.602	1126.26	1005.05
72.5187	1128.96	823.157	851.534	821.517	872.51	864.054		67.7138	515.112	521.267	479.306	509.189	486.195	499.749	484.231		72.4862	1255.47	829.137	968.902	809.689	1128.03	1001.56
73.5427	1128.43	824.302	847.794	822.948	871.302	863.382		68.686	522.33	525.916	482.175	513.374	488.597	502.916	487.125		73.5031	1255.01	831.907	969.232	810.688	1130.26	1005.32
74.5667	1127.23	819.127	847.025	819.482	868.441	862.358		69.6859	516.066	523.776	478.636	512.207	486.609	497.775	486.099		74.5262	1261.88	833.969	970.85	813.993	1132.66	1008.18
75.5917	1127.03	820.408	847.503	820.369	871.019	860.731		70.6859	514.025	520.274	476.875	507.418	483.771	496.479	482.35		75.5492	1255.91	832.886	971.566	811.99	1127.47	1004.73
76.6157	1128.86	821.635	849.63	822.286	873.392	860.469		71.6859	518.107	524.828	483.219	512.168	486.361	500.888	485.869		76.5722	1257.05	832.582	967.335	809.551	1129.98	1001.65
77.6407	1132.74	821.03	848.939	821.394	870.455	862.8		72.6859	519.944	526.004	480.8	512.52	486.923	499.941	485.298		77.5901	1254.24	832.105	969.51	810.483	1125.6	1002.55
78.6647	1130.18	823.339	850.088	824.679	873.69	863.842		73.6859	515.946	522.84	479.093	510.21	485.773	498.137	483.081		78.6122	1256.43	834.91	972.079	811.503	1131.17	1004.59
79.6836	1129.96	822.109	847.846	820.593	869.246	861.32		74.6859	519.91	527.127	483.224	514.241	491.219	502.274	487.026		79.8369	1257.33	833.917	970.936	813.382	1131.75	1004.2
80.7077	1131.71	822.142	850.568	824.121	873.238	864.722		75.686	520.354	525.622	480.011	513.498	488.306	500.707	487.169		81.0071	1255.18	829.231	968.599	810.517	1129.83	1003.47
81.7317	1125.52	818.593	846.684	819.945	869.653	861.587		76.6859	515.907	521.066	475.587	508.063	484.774	495.522	482.232		82.1788	1257.41	833.798	972.06	812.364	1130.48	1005.56
82.7547	1127.72	820.442	846.91	821.638	869.23	860.315		77.6859	518.042	525.713	480.229	511.483	487.278	499.367	485.286		83.3486	1254.4	831.176	969.439	809.989	1126.93	1001.68
83.7747	1129.74	826.263	852.008	826.537	870.848	864.436		78.6859	519.631	527.385	482.981	513.619	488.746	500.287	488.579		84.519	1254.3	831.839	968.155	811.902	1126.34	1002.53
84.7937	1128.72	821.838	849.956	822.043	871.363	862.971		79.6859	515.216	522.027	476.014	509.24	483.919	494.878	481.749		85.6896	1254.41	831.114	969.575	812.123	1130.17	1004.09
85.8177	1125.8	820.697	850.092	820.955	870.137	860.795		80.686	520.73	527.08	481.345	515.754	488.584	499.754	486.798		86.8591	1254.04	831.988	969.236	809.813	1125.54	1005.66
86.8428	1124.81	820.886	847.315	820.653	868.272	859.956		81.6859	519.836	526.731	479.978	512.69	488.297	499.894	486.817		88.0292	1247.83	827.975	967.176	807.527	1124.07	1000.79
87.8667	1125.7	823.665	850.451	821.791	867.405	861.754		82.686	516.205	523.013	477.455	510.185	486.701	497.436	481.703		89.1987	1251.33	829.651	970.155	808.705	1128.4	1006.21
88.8907	1128.44	822.08	850.426	823.066	868.931	864.773		83.6859	521.768	526.896	482.283	515.056	490.344	501.911	487.814		90.3691	1251.62	831.603	968.95	811.009	1126.02	1005.08
89.9137	1126.05	822.863	847.713	823.368	868.112	863.415		84.6859	514.429	521.965	476.338	509.336	484.743	496.389	482.053		91.5385	1247.51	830.277	964.08	807.907	1124.72	1002.24
90.9367	1125.04	822.947	850.941	821.531	867.304	861.051		85.686	517.207	524.493	480.339	509.269	484.621	498.798	485.035		92.7051	1250.33	828.241	967.827	808.097	1123.53	1000.96
91.9597	1129.35	824.205	851.147	825.439	869.796	864.259		86.686	518.928	526.131	481.822	513.466	491.374	501.817	486.806		93.8718	1251.55	829.146	968.313	811.961	1124.12	1002.08
92.9837	1125.9	822.067	850.69	823.883	868.321	863.065		87.6859	515.526	523.421	479.146	511.619	484.321	497.482	484.269		95.0426	1251.42	829.68	969.05	810.274	1127.63	1002.41
94.0057	1124.82	824.094	850.743	823.407	867.941	864.994		88.6859	513.483	520.683	476.593	507.752	482.53	496.755	481.989		96.2089	1250.23	830.1	970.171	811.36	1128.25	1004.63
95.0287	1124.04	822.752	850.873	822.503	867.644	867.118		89.6859	518.785	527.798	481.459	512.251	487.664	501.789	487.944		97.3789	1250.33	830.05	966.677	810.703	1127.19	1006.11
96.0517	1124.04	822.59	849.138	823.568	868.076	865.941		90.686	516.757	521.793	478.283	510.471	485.592	498.226	483.796		98.5485	1252.37	829.933	966.331	808.405	1125.6	1004.57
97.0748	1129.02	824.811	851.767	824.354	868.757	866.551		91.6859	515.867	523.881	480.609	510.178	485.323	497.414	483.399		99.719	1250.39	827.886	967.24	809.27	1124.21	1000.45
98.0977	1121.3	824.162	851.198	824.022	866.254	864.181		92.6859	519.4	526.985	481.858	512.117	487.875	501.022	487.221		100.889	1246.59	825.702	967.978	806.58	1124.25	1001.71
99.1207	1122.15	825.439	849.992	824.655	868.638	864.84		93.6859	516.466	522.462	479.472	510.796	485.325	497.764	483.215		102.059	1246.23	826.28	965.152	804.824	1121.95	999.278
100.145	1125.2	822.012	853.456	824.882	869.985	865.527		94.686	520.04	527.311	482.304	514.821	488.137	503.9	488.245		103.229	1250.46	828.896	968.704	808.11	1126.71	1005.27
101.167	1121.72	825.332	848.917	823.385	866.707	867.727		95.686	518.688	524.158	480.545	512.221	488.049	499.374	486.185		104.4	1249.69	829.354	968.283	809.513	1128.07	1004.11
102.184	1120.99	823.3	850.131	824.169	868.992	862.149		96.6859	514.001	520.884	477.048	509.53	484.201	497.513	482.006		105.57	1248.51	827.599	964.025	808.192	1123.54	1004.55
103.207	1122.23	822.745	852.358	824.728	868.066	865.99		97.6859	514.392	522.167	478.314	510.712	483.524	497.3	481.914		106.74	1250.2	828.371	965.304	806.689	1125.84	1001.09
104.23	1123.24	823.999	853.363	825.49	868.933	867.176		98.6859	519.355	525.805	481.72	514.524	489.817	500.808	488.73		107.91	1249.89	826.482	966.682	809.316	1127.31	1004.38
105.254	1124.07	823.156	852.252	826.564	870.398	868.14		99.6859	515.439	522.314	477.609	512.281	483.32	498.906	483.599		109.08	1249.25	828.144	967.156	807.443	1125.35	1003.09
106.277	1125.43	826.195	854.226	825.716	869.93	864.314		100.686	518.705	525.719	481.585	511.473	485.633	501.239	486.547		110.249	1245.58	825.803	963.498	806.008	1121.33	999.769
107.298	1125.1	826.964	856.588	828.522	872.662	866.229		101.686	518.779	526.359	481.683	512.219	488.944	499.151	485.134		111.42	1251.01	827.985	964.731	807.484	1124.69	1002.82
108.316	1122.69	828.555	853.922	827.995	871.571	867.458		102.686	514.249	520.307	477.657	507.764	484.025	497.398	482.313		112.591	1247.9	827.717	965.029	807.858	1121.92	1001.04
109.339	1124.55	826.621	855.147	826.015	871.969	866.163		103.686	515.686	522.492	480.473	510.592	484.341	499.193	483.529		113.76	1248.26	825.092	963.646	806.843	1123.54	1001.95
110.362	1121.34	824.398	854.007	825.52	871.805	866.983		104.686	519.617	525.499	482.417	512.727	488.063	499.451	485.753		114.786	1247.06	827.721	964.601	806.978	1123.75	1003.75
111.385	1121.72	828.194	854.951	827.558	874.337	866.043		105.686	514.28	522.668	477.776	508.564	483.747	496.235	483.863		115.956	1245.01	824.134	961.749	805.741	1121.89	1000.73
112.408	1127.5	828.043	856.424	825.432	873.722	866.53		106.686	520.09	527.953	483.347	514.023	489.945	501.676	487.066		117.126	1245.91	827.144	965.934	807.332	1126.95	1004.82
113.431	1123.93	829.993	855.304	827.059	875.538	867.799		107.788	514.358	518.912	477.236	509.301	483.161	496.715	481.583		118.292	1245.2	829.318	965.581	807.456	1125.83	1001.95
114.454	1124.28	829.373	853.864	828.873	875.558	869.912		108.715	511.016	519.287	477.122	507.124	481.981	497.161	482.243		119.461	1245.55	825.029	960.676	807.668	1124.64	1001.47
115.477	1121.67	827.419	855.649	828.405	874.936	866.176		109.738	516.546	524.273	479.77	510.386	485.842	500.639	484.917		120.632	1246.03	827.839	966.103	809.344	1125.76	1006.15
116.5	1117.36	824.301	855.644	827.452	872.92	864.805		110.761	510.893	519.229	476.593	505.703	482.934	496.314	482.865
117.523	1119.25	829.687	856.056	827.344	873.387	867.319		111.686	511.794	517.31	476.921	508.392	482.509	494.297	481.969
118.546	1115.06	829.212	856.373	827.023	871.731	866.07		112.711	513.541	519.695	477.546	509.03	481.949	495.464	483.788
119.568	1115.67	829.831	856.639	825.836	872.367	865.614		113.733	516.379	523.29	478.395	511.384	484.557	499.856	485.53
120.591	1118.46	827.62	855.116	827.285	872.793	868.236		114.756	511.437	519.762	475.677	506.843	483.697	496.338	483.142
121.614	1117.48	830.327	854.88	826.061	877.404	870.014		115.686	514.798	520.994	477.869	509.785	484.919	500.169	484.798
122.637	1120.78	829.222	860.073	829.449	876.619	867.536		116.712	513.68	521.053	477.648	509.382	483.158	497.827	483.561
123.659	1115.68	829.714	857.264	827.905	875.195	866.51		117.736	513.93	521.849	478.773	510.365	484.868	498.979	482.926
124.677	1115.47	829.923	854.683	826.276	874.561	866.852		118.759	513.612	523.131	478.224	511.183	486.086	499.242	485.074
125.695	1118.39	829.397	856.144	828.314	877.069	867.146		119.686	512.813	518.714	477.128	508.879	482.533	496.765	482.211
126.718	1115.45	828.378	856.659	827.713	873.695	865.998
127.743	1114.47	830.368	856.219	829.356	874.404	868.678
128.772	1110.12	827.761	856.395	826.48	875.18	868.064
129.794	1114.98	829.82	856.519	828.019	875.435	865.788
130.819	1111.82	830.256	856.593	826.446	874.585	867.947
131.839	1118.74	833.422	861.401	832.405	878.54	869.449
132.863	1119.34	833.23	858.53	827.157	878.378	869.758
133.887	1118.1	831.971	856.438	828.897	878.19	867.588
134.911	1113.4	830.024	855.604	826.553	871.455	866.894
135.936	1119.23	832.897	861.825	833.514	881.319	869.209
136.96	1117.86	831.488	858.359	829.832	877.738	869.31
137.985	1114.71	830.417	856.917	827.854	876.107	867.681
139.012	1114.03	829.876	853.201	826.467	874.753	866.065
140.037	1117.69	831.591	856.704	827.326	874.615	869.019
141.061	1114.39	830.661	856.198	826.309	873.427	864.101
142.081	1116.57	830.215	858.76	830.2	877.171	866.237
143.105	1121.05	834.042	860.358	830.347	879.506	868.131
144.129	1115.02	829.514	858.184	825.12	871.514	864.507
145.153	1113.09	828.185	855.981	823.992	871.188	863.749
146.177	1117.12	830.563	857.691	826.127	875.329	866.033
147.202	1115.29	833.417	858.897	828.443	875.844	868.664
148.222	1117.48	832.585	859.224	826.436	874.424	867.701
149.246	1115.75	832.26	857.69	828.558	878.253	865.639
150.27	1114.86	830.466	854.554	822.456	873.378	864.381
151.296	1117.25	835.042	859.13	826.461	877.889	868.689
152.327	1112.47	829.988	854.336	824.037	875.216	865.402
153.352	1118.18	833.364	857.573	826.151	875.078	866.221
154.377	1116.43	830.527	856.858	826.575	876.828	867.705
155.402	1113.93	831.882	858.145	827.829	874.229	866.381
156.425	1113.8	830.305	856.846	826.256	875.532	864.714
157.443	1107.74	830.023	856.227	825.144	872.086	863.358
158.466	1108.88	831.258	857.911	826.079	872.917	864.802
159.489	1109.17	831.068	855.761	823.16	874.234	861.846
160.513	1107.82	828.118	852.307	821.695	871.997	860.098
161.536	1111.6	832.396	857.072	824.363	875.457	862.805
162.559	1112.55	836.015	860.049	827.267	875.367	865.376
163.582	1106.63	830.008	855.024	822.087	874.571	861.325
164.605	1106.83	829.592	854.967	823.36	873.659	862.041
165.628	1105.39	829.737	853.677	822.464	869.859	860.605
166.646	1107.98	829.32	853.449	823.895	873.572	863.512
167.669	1107.35	832.039	855.764	823.596	873.215	862.173
168.687	1106.65	830.062	853.714	823.784	871.078	860.514
169.71	1108.76	831.253	854.513	822.997	875.456	860.537
170.733	1110.75	831.466	856.312	823.257	873.734	860.278
171.756	1109.44	828.808	854.202	822.556	875.029	859.101
172.779	1111.45	832.799	854.824	821.307	873.251	860.678
173.802	1111.91	832.483	854.256	821.52	875.211	863.12
174.825	1113.25	833.723	859.306	826.092	880.58	865.378
175.848	1112.72	831.171	856.687	821.964	876.198	862.313
176.866	1111.36	835.485	857.142	823.741	878.914	863.393
177.889	1111.02	831.142	854.581	820.961	874.851	861.992
178.912	1110.02	831.886	855.283	821.791	875.931	861.429
179.935	1111.96	832.521	854.404	822.012	876.781	864.302
